# Supplementary material for: Identifying temporal molecular signatures underlying cardiovascular diseases: A data science platform
Source: PubMed Central journal article supplement (PMC7583079; doi:10.1016/j.yjmcc.2020.05.020), 2020-06-03
Supplement: NIHMS1637030-supplement-Supplementary_Data.pdf [file NIHMS1637030-supplement-Supplementary_Data.pdf]

## SUPPLEMENTAL INFORMATION

Identifying Temporal Molecular Signatures Underlying Cardiovascular Diseases: A Data Science Platform

Neo Christopher Chung<sup>1,2,3,\*</sup>, Howard Choi<sup>1,2,4,5</sup>, Ding Wang<sup>2</sup>, Bilal Mirza<sup>2</sup>, Alexander R. Pelletier<sup>1,4,5</sup>, Dibakar Sigdel<sup>1,2</sup>, Wei Wang<sup>1,4,5</sup>, Peipei Ping<sup>1,2,4,5,\*</sup>

<sup>1</sup>NHLBI Integrated Cardiovascular Data Science Training Program at University of California, Los Angeles (UCLA), <sup>2</sup>Departments of Physiology and Medicine (Cardiology) at UCLA School of Medicine, <sup>3</sup>Institute of Informatics, Faculty of Mathematics, Informatics and Mechanics University of Warsaw, Warsaw, Poland, <sup>4</sup>Bioinformatics and Medical Informatics, and <sup>5</sup>Scalable Analytics Institute (ScAi) at UCLA School of Engineering, Los Angeles, CA, 90095, USA

## Preprocessing Assessment

Preprocessing helps the users to impute and denoise temporal proteomics data. It is important to understand how the choices of methods and parameters impact data analysis. While comprehensive comparison is beyond the scope of this paper, we have used two assessment approaches to ensure reliability. First, we calculated Pearson correlation statistics between original observed O-PTM values and their corresponding preprocessed values. Then, these 1605 correlation statistics are shown in **Supplemental Figure S1A**. Most users may likely be interested in ensuring that such correlation remains high. In O-PTM data, the correlation coefficients are strongly skewed towards 1, with a median of 0.97. Second, similarly we calculated the mean squared differences (MSD) between original and preprocessed data. As shown in **Supplemental Figure S1B**, The median MSD is 0.28 and 76.8% of O-PTMs have MSDs < 1. Unlike correlation coefficients which are bounded by [-1,1], MSDs depend on magnitudes. Note that extremely low MSDs do not necessarily mean superior performance; not applying any denoising would result in MSD = 0. In the future, it may be beneficial to utilize preprocessing assessments such as correlation and MSD to filter out problematic variables in the downstream analyses.

## Selecting the Number of Clusters

A key hyperparameter in identifying major temporal patterns in an unsupervised setting is the number of clusters. As one of the most popular methods, the Elbow method creates the scree plot of the total within-cluster sum of squares (WCSS). Generally, one would like to approximate the point of inflection (elbow point) in WCSS. Our analysis indicates the point of inflection around 5 (**Fig. 2A**). Alternatively, the silhouette analysis measures within-cluster cohesion and between-cluster separation [9]. Ranging from -1 to 1, the high values indicate better clustering where a variable is confidently assigned to its own cluster. In **Supplemental Figure S2**, the average silhouette values are shown; the maximum value occurs at 2. However, using K of 2 is the most coarse option, splitting O-PTMs into two large groups (**Supplemental Figure S3**). It appears when K is set to 5, we could get the most distinct representatives of temporal patterns. We recommend the investigators to test a range of K values based on visualization, evaluation metric, and data analysis.

## Alternate Choices in Omics Analysis Software Packages

There exists a wide range of software packages that facilitate omics data analyses. Here we provide comparisons of their functional specialties, which may help investigators to choose for

their own datasets. Generally, identifying major patterns in large-scale data is an active area of research, and time-series clustering remains a challenge [1,2]. Thus, there are several popular software packages that aim to accomplish clustering temporal proteomics data.

TSClust written in R by Drs. Montero and Vilaris (University of A Coruña) implements various similarity measures and time-series clustering algorithms [3]. This includes and extends K-means clustering, hierarchical clustering, and dynamic time warping [4]. It may be very useful to compare different model-free and model-based algorithms and their options available in TSClust. However, it doesn't provide an end-to-end pipeline, such as preprocessing and evaluation, and is not tailored to proteomics or cardiovascular research. CV.Signature.TCP is designed to be modular and extensible such that other clustering algorithms can be incorporated when appropriate.

MetaboAnalyst developed by Xia Lab (McGill University) and Wishart Lab (University of Alberta) offers a web-based platform with a variety of commonly used procedures for data processing, multivariate statistical analysis and data annotation [5]. There are some similarities between MetaboAnalyst and our platform, such as SVD/PCA for missing value imputation and k-means clustering. In contrast, we focus on identifying molecular signatures from temporal proteomics. CV.Signature.TCP performs data preprocessing prior to the Clustering module, which reduces noise from temporal proteomics data, allowing essential patterns of the variables to stand out. Moreover, CV.Signature.TCP offers the Evaluation module to identify biological variables with significant temporal patterns.

mixOmics is an R package composed by Prof. Lê Cao and colleagues (University of Melbourne) for multivariate models of omics data, integrating a mixture of omics data [6]. Analysis methods available in mixOmics mostly rely on existing phenotypes. With respect to phenotypes or other independent variables, mixOmics identifies important variables such as proteins. In contrast, CV.Signature.TCP enables an unsupervised clustering and evaluation, and may be helpful when independent variables are inaccurate or unavailable. Note that both mixOmics and CV.Signature.TCP allow missing data imputation using the non-linear Iterative Partial Least Squares (NIPALS) algorithm [7]. Particularly, in Preprocessing module, PCA/SVD must be approximated if there are missing values, where NIPALS [7] and SVDImpute [8] are available for missing data imputation.

## Temporal and Functional Annotation of O-PTMs

We conducted the temporal and functional annotation of O-PTMs. Our goal is not only to perform pathway enrichment on the protein hosts of O-PTMs, but also to uncover whether there are potential links between the temporal behavior of an O-PTM and its functional attribute. Functional annotation often implies the spatial proximity (e.g., ETC complex proteins), subcellular localization (e.g., ECM proteins), and sequence homology (e.g, contractile proteins) among members belonging to the same pathway. We input the protein hosts of O-PTMs exhibiting the same temporal patterns (i.e., separately for members in Clusters I-V) into the analysis pipeline using the Reactome database ([www.reactome.org](http://www.reactome.org)) and the over-representation of pathways was statistically measured using hypergeometric test followed by multiple testing correction (i.e., Benjamini-Hochberg method). The false discovery rates (FDR) were then used to map the high-score functional pathways back to the proteins associated with individual temporal clusters. We first selected 36 pathways that highly enriched with O-PTMs with temporal significance and then prioritized 10 pathways carrying significant biological functions (**Fig. 2D**). Within each biological functional group (BFs) of proteins, their O-PTMs are categorized into 5 clusters based on their temporal behaviors under oxidative regulation, which are defined by 3 critical parameters (i.e., the number of O-PTMs, FDR, and number of protein hosts).

## SUPPLEMENTAL FIGURES

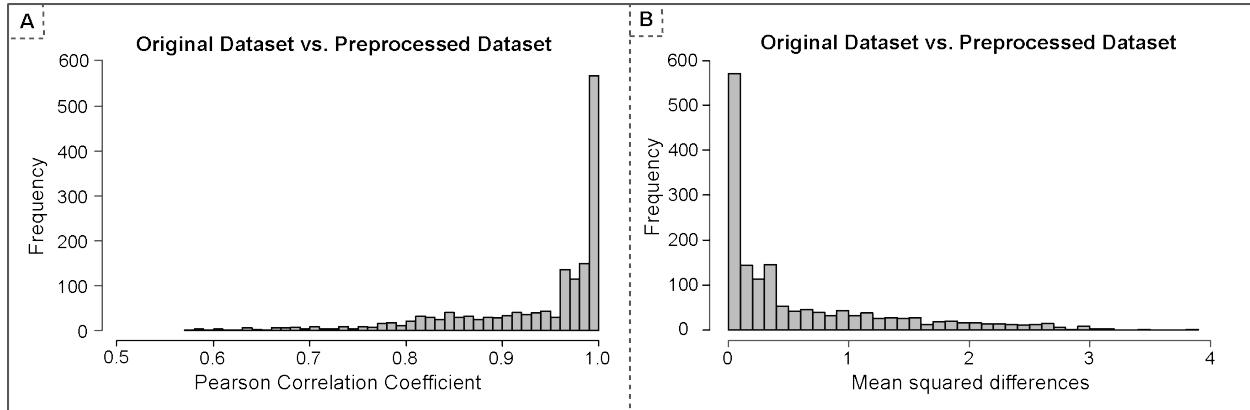

**Supplemental Figure S1.** Preprocessing assessment. We calculate Pearson correlation statistics and mean squared differences (MSD) between the original O-PTM values and corresponding preprocessed values. The medians of correlation and MSD are 0.97 and 0.28, respectively.

(Two-column Figure, Black & White Figure)

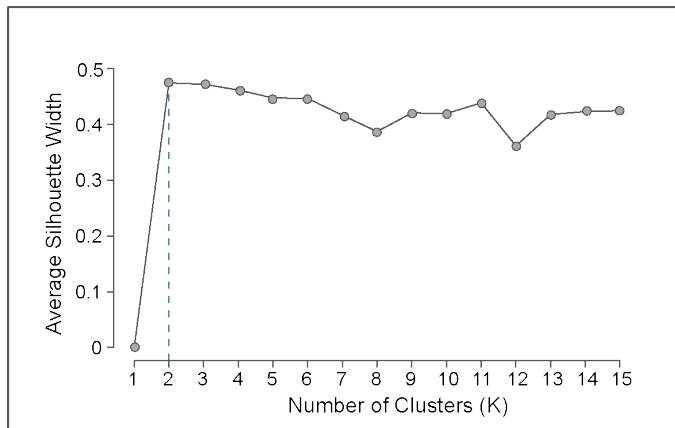

**Supplemental Figure S2.** Silhouette analysis of O-PTM data. In addition to the scree plot of the total within-cluster sum of squares (Figure 2(a)), the silhouette plot may be used to help select the number of clusters. In O-PTM data, the maximum average silhouette width occurs at K=2.

(One-column Figure, Color Figure)

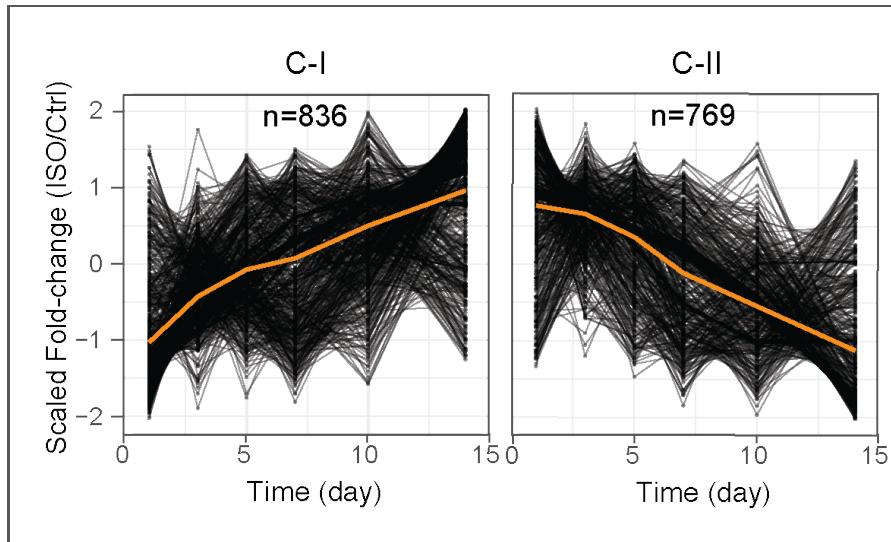

**Supplemental Figure S3.** K-means clustering of O-PTM data with K=2. Out of 1605 preprocessed O-PTMs, 836 and 769 O-PTMs were clustered into clusters I and II, respectively. Exploring the O-PTM data demonstrated that setting a small K (e.g., as suggested by the silhouette plot) may ignore granular temporal trends. (One-column Figure, Color Figure)

## SUPPLEMENTAL BIBLIOGRAPHY

- [1] Aghabozorgi S, Seyed Shirخورshidi A, Ying Wah T. Time-series clustering – A decade review. *Inf Syst* 2015; 53:16–38. <https://doi.org/10.1016/j.is.2015.04.007>.
- [2] Liao TW. Clustering of time series data — a survey. *Pattern Recognition* 2005; 38: 1857–74. <https://doi.org/10.1016/j.patcog.2005.01.025>.
- [3] Montero P, Vilar JA. TSClust: an *R* package for time series clustering. *J Stat Softw* 2014; 62(1): 1–43. <https://doi.org/10.18637/jss.v062.i01>.
- [4] Berndt DJ, Clifford J. Using dynamic time warping to find patterns in time Series. AAAIWS'94: Proceedings of the 3rd International Conference on Knowledge Discovery and Data Mining 1994; 359–370.
- [5] Chong J, Wishart DS, Xia J. Using metaboanalyst 4.0 for comprehensive and integrative metabolomics data analysis. *Curr Protoc Bioinformatics* 2019; 68(1): e86. <https://doi.org/10.1002/cpbi.86>.
- [6] Rohart F, Gautier B, Singh A, Lê Cao K-A. mixOmics: An R package for 'omics feature selection and multiple data integration. *PLoS Comput Biol* 2017; 13(11): e1005752. <https://doi.org/10.1371/journal.pcbi.1005752>.
- [7] Wold H. Path models with latent variables: The NIPALS approach. In: Blalock HM, Aganbegian A, Borodkin FM, Boudon R, Capecchi V (Eds.), *Quantitative Sociology*, New York: Academic Press; 1975, pp. 307–57.
- [8] Troyanskaya O, Cantor M, Sherlock G, Brown P, Hastie T, Tibshirani R, et al. Missing value estimation methods for DNA microarrays. *Bioinformatics* 2001; 17(6): 520–5. <https://doi.org/10.1093/bioinformatics/17.6.520>.
- [9] Rousseeuw PJ. Silhouettes: A graphical aid to the interpretation and validation of cluster analysis. *J Comput Appl Math* 1987; 20: 53–65. [https://doi.org/10.1016/0377-0427\(87\)90125-7](https://doi.org/10.1016/0377-0427(87)90125-7).

## SUPPLEMENTAL TABLES.

**Supplemental Table S1.** A list of 1,605 cysteine O-PTMs and their abundance ratios (i.e., abundance of ISO-treated over control mice) across 6 timepoints.

| UniProt ID | Modified Amino Acid | Cysteine PTM type | Day 1 | Day 3 | Day 5 | Day 7 | Day 10 | Day 14 |
|------------|---------------------|-------------------|-------|-------|-------|-------|--------|--------|
| A2ASQ1     | C123                | reversible        | 0.81  | 1.02  | 0.94  | 0.93  | NA     | NA     |
| A2ASQ1     | C1921               | reversible        | 0.9   | 1.23  | 0.77  | 1.09  | NA     | 1.11   |
| A2ASQ1     | C441                | reversible        | 0.84  | 0.79  | 0.95  | 0.89  | 0.79   | 0.87   |
| A2AUC9     | C35                 | reversible        | NA    | 1.63  | 1     | 0.98  | 0.63   | 0.96   |
| A2AUC9     | C593                | reversible        | 1.4   | NA    | 1.34  | 1.11  | 0.68   | 0.83   |
| O08528     | C368                | reversible        | 1.21  | NA    | 0.64  | 0.7   | 0.83   | 0.61   |
| O08528     | C375                | reversible        | 1.26  | 1.97  | 0.72  | 0.69  | NA     | 0.68   |
| O08528     | C909                | reversible        | 1.29  | 1.17  | 0.74  | 0.73  | 1.12   | 0.78   |
| O08529     | C82                 | reversible        | 1.39  | 0.92  | 0.55  | 0.95  | NA     | 1.08   |
| O08553     | C248                | reversible        | 0.89  | 1.51  | 1.15  | 1.36  | 1.52   | 1.46   |
| O08553     | C504                | reversible        | 1.03  | 1.11  | 1.17  | 1.1   | 1.47   | 0.96   |
| O08677     | C339                | reversible        | 0.98  | 0.61  | 1.42  | 0.98  | 0.87   | 1.26   |
| O08709     | C47                 | reversible        | 0.87  | 1.12  | 1.07  | 0.81  | 1.25   | 1.36   |
| O08749     | C477                | reversible        | NA    | 0.89  | 1.05  | NA    | 0.72   | 0.75   |
| O08749     | C80                 | reversible        | 1.02  | 1.09  | 0.8   | 0.89  | 0.75   | 1.33   |
| O08749     | C85                 | reversible        | 1.01  | 1.1   | 0.71  | 0.86  | 0.92   | 1.18   |
| O08796     | C145                | reversible        | 0.93  | 0.95  | 0.73  | 0.82  | 0.82   | NA     |
| O08807     | C54                 | reversible        | 1.12  | 1.06  | 1.58  | 1.54  | 1.39   | NA     |
| O09161     | C53                 | reversible        | 1.07  | 1.06  | 0.95  | 0.72  | 0.78   | 1.05   |
| O35459     | C186                | reversible        | 1.09  | 0.93  | 0.99  | 0.66  | 0.86   | 1.29   |
| O35459     | C91                 | reversible        | 1.05  | 0.92  | 0.84  | 0.53  | 0.62   | 0.88   |
| O35604     | C177                | reversible        | 0.78  | 0.9   | 1.11  | 0.9   | 0.97   | 1.38   |
| O35678     | C55                 | reversible        | NA    | 1.05  | 1.12  | 1.02  | NA     | 1.21   |
| O35682     | C273                | reversible        | 0.88  | 1.12  | 1     | 1.02  | 0.78   | 1.12   |
| O35855     | C136                | reversible        | 0.8   | 0.95  | 1.26  | NA    | NA     | 1      |
| O35855     | C148                | reversible        | NA    | 0.69  | 0.87  | 0.7   | 0.89   | 0.83   |
| O35855     | C229                | reversible        | 0.99  | 0.97  | 1.21  | 0.86  | 0.78   | 1.13   |
| O35855     | C343                | reversible        | 1.08  | 0.98  | 0.88  | 0.8   | 0.67   | 0.97   |
| O35855     | C346                | reversible        | 1.33  | 1.13  | 1.44  | 0.9   | NA     | NA     |
| O35855     | C93                 | reversible        | 1.12  | 1.34  | 1.01  | NA    | 1.04   | 1.04   |
| O55023     | C183                | reversible        | NA    | 1.22  | 1.28  | 1.23  | 1.61   | 1.55   |
| O55040     | C5                  | so3h              | 1.07  | 1.32  | NA    | 1.29  | NA     | 1.45   |



|        |       |            |      |      |      |      |      |      |
|--------|-------|------------|------|------|------|------|------|------|
| O55040 | C8    | so3h       | 1.07 | 1.32 | NA   | 1.29 | NA   | 1.45 |
| O55126 | C80   | reversible | 1.41 | 1.02 | 1.14 | 1.22 | NA   | NA   |
| O55126 | C88   | reversible | 1.06 | 1.09 | 1.14 | 0.82 | 1.09 | 1.21 |
| O55137 | C412  | reversible | 1.89 | 0.96 | 1.08 | NA   | NA   | 0.64 |
| O55143 | C349  | reversible | 0.76 | 0.92 | 0.78 | 0.89 | 0.92 | 1.06 |
| O55143 | C377  | reversible | 0.92 | 1.48 | 0.78 | 0.77 | 1.3  | 1    |
| O55143 | C447  | reversible | 0.88 | 1    | 0.82 | 0.76 | 1.1  | 1.1  |
| O55143 | C471  | reversible | 0.97 | 1.37 | 0.67 | 0.85 | 1.69 | 1.61 |
| O55143 | C635  | reversible | 1.04 | 1.24 | 0.79 | 0.81 | 1.17 | 1.1  |
| O55143 | C669  | reversible | 1    | 1.32 | 0.88 | 0.79 | 1.17 | 1.12 |
| O55143 | C875  | reversible | 0.96 | 1.11 | 0.67 | 0.74 | 1.17 | 0.96 |
| O70250 | C153  | reversible | 1.05 | 1.29 | 1.08 | 0.71 | 1    | 1.46 |
| O70325 | C102  | reversible | 1.05 | 1.26 | 1.52 | 1.23 | 1.14 | 1.24 |
| O70423 | C430  | reversible | 0.98 | 0.66 | 1.04 | 0.91 | 0.98 | 0.97 |
| O70433 | C165  | reversible | 1.09 | NA   | 0.72 | 1.25 | 1.31 | 1.66 |
| O70433 | C272  | reversible | 1.33 | NA   | 0.71 | NA   | 2.27 | 1.08 |
| O70433 | C275  | reversible | 0.78 | 1.31 | 0.91 | 1.24 | NA   | 1.59 |
| O70468 | C715  | reversible | 1.1  | 1.24 | 0.67 | 0.67 | 1.14 | 1.01 |
| O88342 | C325  | reversible | 1.14 | 1.69 | 1.1  | 0.8  | 1.12 | 1.85 |
| O88569 | C50   | reversible | 1.46 | 2.61 | 1.49 | NA   | NA   | 1.23 |
| P01027 | C1101 | reversible | 1.14 | 1.38 | 1.86 | 1.63 | 1.23 | 1.14 |
| P01027 | C1389 | reversible | 1.04 | 1.17 | 1.5  | 1.77 | 1.65 | 1.37 |
| P01027 | C1458 | reversible | 1.05 | 1.18 | 1.7  | 1.44 | 1.11 | 1.06 |
| P01027 | C1489 | reversible | 1.24 | 1.37 | 1.76 | 1.49 | 1.47 | 1.35 |
| P01027 | C1511 | reversible | 1.24 | 1.3  | 1.94 | NA   | 1.33 | 2.19 |
| P01027 | C1537 | reversible | 1.08 | 1.36 | 1.71 | 1.77 | 1.33 | 1.13 |
| P01027 | C559  | reversible | 1.22 | 1.47 | 2.04 | 1.64 | 1.36 | 1.27 |
| P01027 | C626  | reversible | 1.18 | 1.49 | 1.93 | 1.46 | 1.44 | NA   |
| P01027 | C720  | reversible | 1.04 | 1.29 | 1.92 | 1.6  | 1.3  | 1.22 |
| P01027 | C727  | reversible | 1.11 | 1.1  | 2.06 | 1.18 | 0.68 | 0.87 |
| P01027 | C728  | reversible | 1.07 | 1.03 | 1.56 | 1.38 | 1.01 | 1.25 |
| P01027 | C816  | reversible | 1.26 | 1.51 | 1.86 | 1.75 | 1.65 | 1.29 |
| P01027 | C873  | reversible | 0.95 | 1.5  | 1.86 | 1.41 | 1.55 | 1    |
| P01029 | C1612 | reversible | 1.01 | 1.16 | 1.37 | 0.82 | 1.4  | 0.85 |
| P01837 | C26   | reversible | 0.87 | 1.16 | 1.67 | NA   | 1.59 | 1.34 |
| P01868 | C138  | reversible | 1    | 1.16 | 1.27 | 0.52 | 1.43 | 1.82 |
| P01872 | C135  | reversible | 1.24 | 1.09 | 1.29 | NA   | 0.36 | 1.4  |
| P01872 | C27   | reversible | 1.09 | 0.96 | 1.07 | 1.07 | NA   | 1.39 |
| P01872 | C88   | reversible | 1.2  | NA   | 0.96 | 1.18 | 0.83 | 1.1  |

|        |       |            |      |      |      |      |      |      |
|--------|-------|------------|------|------|------|------|------|------|
| P01942 | C105  | so3h       | 0.73 | 1.22 | NA   | 1.14 | 1.67 | 0.91 |
| P02088 | C94   | reversible | 0.84 | 1.52 | 0.99 | 1.13 | 1.36 | 1.64 |
| P02089 | C94   | reversible | 1.02 | NA   | 1.2  | 1.01 | 1.31 | 1.45 |
| P02463 | C1616 | reversible | 0.86 | 1.43 | 1.38 | 1.4  | 1.53 | 1.19 |
| P02468 | C349  | reversible | 0.92 | 0.75 | 1    | 1.01 | 0.84 | 1.17 |
| P02468 | C472  | reversible | 0.9  | 1.03 | NA   | NA   | 1.12 | 1.26 |
| P02469 | C170  | reversible | NA   | 0.92 | 1.38 | 0.96 | NA   | 0.97 |
| P02469 | C1785 | reversible | 0.86 | 1.04 | 1.53 | 1.19 | 1.02 | 0.91 |
| P02469 | C190  | reversible | 0.9  | 0.79 | 1.09 | 0.96 | NA   | 0.83 |
| P02469 | C455  | reversible | 1.06 | 1.3  | 1.08 | NA   | 1.89 | 0.84 |
| P04186 | C188  | reversible | 1.06 | 1.29 | 1.04 | 0.92 | 1.24 | 0.85 |
| P04186 | C59   | reversible | 1.15 | 1.29 | 1.06 | NA   | 1.38 | NA   |
| P04186 | C593  | reversible | 1.03 | 0.76 | 1.18 | 1.04 | 2.53 | 1.03 |
| P04186 | C596  | reversible | 1.17 | 1.52 | NA   | 1.17 | NA   | 1.01 |
| P05064 | C178  | reversible | 1.14 | 1.08 | 1.1  | 1.05 | 1    | 1.34 |
| P05064 | C202  | reversible | 0.95 | 0.82 | 0.96 | 1.37 | 1.15 | 1.26 |
| P05064 | C339  | reversible | 1.07 | 1.25 | 1.03 | 1.36 | 1.27 | 1.8  |
| P05064 | C73   | reversible | 0.97 | 1.13 | 0.97 | 1.21 | 1.29 | 1.21 |
| P05201 | C391  | reversible | 0.96 | 1.48 | 1.31 | 1.08 | 1.47 | 1.33 |
| P05202 | C106  | reversible | 0.96 | 1.08 | 0.92 | 0.89 | 1.21 | 1.14 |
| P05202 | C187  | reversible | 1    | 1.16 | 1.05 | 0.87 | 1.25 | 1.29 |
| P05202 | C212  | reversible | 1.07 | 0.81 | 1.06 | 0.96 | NA   | 0.91 |
| P05202 | C295  | reversible | 0.95 | 1.49 | 1.06 | 0.86 | 1.73 | 1.19 |
| P05202 | C382  | reversible | 1.05 | 0.83 | 0.92 | 1.05 | NA   | NA   |
| P06151 | C163  | reversible | 1.1  | 1.27 | 1.24 | 1.12 | 1.5  | 1.64 |
| P06684 | C715  | reversible | 0.91 | 1.18 | 0.9  | 1.13 | 1.07 | 0.63 |
| P06745 | C404  | reversible | 0.98 | 1.07 | 1.08 | 0.86 | 1.55 | 1.28 |
| P06909 | C1048 | reversible | 1.28 | 1.36 | 1.82 | 1.27 | 1.7  | NA   |
| P06909 | C1206 | reversible | 1.77 | 1.04 | 1.54 | 1.18 | 1.09 | 1.37 |
| P06909 | C178  | reversible | 0.55 | 0.74 | 1.27 | NA   | NA   | 1.09 |
| P06909 | C267  | reversible | 0.93 | 1.5  | 1.38 | 0.94 | 1.38 | 0.69 |
| P06909 | C294  | reversible | 1.52 | 1.18 | 1.94 | 1.08 | 1.24 | 1.31 |
| P06909 | C536  | reversible | 1.2  | 1.14 | 1.26 | 1.05 | 1.15 | 1.3  |
| P06909 | C569  | reversible | 1.32 | 1.47 | 1.63 | 1.17 | NA   | NA   |
| P06909 | C85   | reversible | 1.61 | 1.84 | 2.01 | 1.46 | 1.79 | 1.18 |
| P06909 | C867  | reversible | 1.46 | 1.37 | 2.16 | 1.69 | 1.32 | 1.14 |
| P06909 | C994  | reversible | 1.32 | NA   | 1.45 | 1.28 | 1.44 | 1.15 |
| P07310 | C146  | reversible | 0.9  | 1.46 | 1.1  | 0.86 | 1.42 | 1.44 |
| P07310 | C254  | reversible | 1.24 | 1.15 | 0.83 | 0.9  | 1.43 | 1.49 |

|        |      |            |      |      |      |      |      |      |
|--------|------|------------|------|------|------|------|------|------|
| P07310 | C283 | reversible | NA   | 1.37 | 1.02 | 1.12 | 1.48 | 1.41 |
| P07724 | C114 | reversible | 1.08 | 1.26 | 1.26 | 0.94 | 1.25 | 1.43 |
| P07724 | C115 | reversible | 1.13 | 1.32 | 1.42 | 0.95 | 1.31 | 1.72 |
| P07724 | C148 | reversible | 1.12 | 1.37 | 1.56 | 0.87 | 1.35 | 1.49 |
| P07724 | C201 | reversible | 1.17 | 1.33 | 1.27 | 0.9  | 1.02 | 1.44 |
| P07724 | C289 | reversible | 1.1  | 1.6  | 1.6  | 0.8  | 1.56 | 1.49 |
| P07724 | C302 | reversible | 1.26 | 1.6  | 1.74 | 1.32 | 1.43 | 1.21 |
| P07724 | C303 | reversible | 1.47 | 1.27 | 1.45 | 0.92 | 0.88 | 1.56 |
| P07724 | C313 | reversible | 1.26 | 1.14 | 1.23 | NA   | 1.09 | 1.34 |
| P07724 | C340 | reversible | 1.08 | 1.08 | 1.17 | 0.94 | 1.14 | 1.34 |
| P07724 | C393 | reversible | 0.84 | 0.77 | 1.3  | 1.46 | 1.11 | 1.14 |
| P07724 | C416 | reversible | 1.02 | 1.86 | 1.24 | 0.9  | 1.97 | 1.23 |
| P07724 | C461 | reversible | 1.02 | 1.22 | 1.13 | 1.31 | 1.21 | 1.2  |
| P07724 | C462 | reversible | 0.85 | 1.02 | 1.28 | 1.3  | 1.14 | 1.39 |
| P07724 | C472 | reversible | 1    | 1.4  | 1.35 | 1.15 | 1.4  | 1.37 |
| P07724 | C472 | so3h       | 1.03 | 1.45 | 0.77 | 1.74 | 1.4  | 1.22 |
| P07724 | C485 | reversible | 1.07 | 1.68 | 1.39 | 1.18 | 1.36 | 1.22 |
| P07724 | C500 | reversible | 0.94 | 1.2  | 1.2  | 1.32 | 1.08 | 1.18 |
| P07724 | C501 | reversible | 0.98 | 0.96 | 1.22 | 1.16 | 1.21 | 1.1  |
| P07724 | C511 | reversible | 1.03 | 1.4  | 1.56 | 1.28 | 1.37 | 1.31 |
| P07724 | C538 | reversible | 1.12 | 1.3  | 1.23 | 1.25 | 1.34 | 1.63 |
| P07724 | C58  | reversible | 1.25 | 1.1  | 1.28 | 1.23 | 1.34 | 1.16 |
| P07724 | C582 | reversible | 1.1  | 1.28 | 1.4  | 1.08 | 1.34 | 1.43 |
| P07724 | C583 | reversible | 1.03 | 1.12 | 1.3  | 1.02 | 1.17 | 1.52 |
| P07724 | C591 | reversible | 1.06 | 1.43 | 1.41 | 1.21 | 1.33 | 1.58 |
| P07724 | C77  | reversible | 1.15 | 1.23 | 1.33 | 0.97 | 1.24 | 1.48 |
| P07724 | C86  | reversible | 1.11 | 1.43 | 1.34 | 1.13 | 1.33 | 1.38 |
| P07724 | C99  | reversible | 1.01 | 1.76 | 1.67 | 1.22 | 1.62 | 1.38 |
| P08228 | C147 | reversible | 0.88 | 1.39 | 1.12 | 0.7  | 1.7  | 1.01 |
| P08249 | C212 | reversible | 1.27 | 1.55 | 1.49 | 1.13 | 1.23 | 1.67 |
| P08249 | C275 | reversible | 1.03 | 1.48 | 1.14 | 0.59 | 1.39 | 1.37 |
| P08249 | C285 | reversible | 1.04 | 1.42 | 1.09 | 0.74 | 1.39 | 1.36 |
| P08249 | C89  | reversible | 0.98 | 1.3  | 1.13 | 0.78 | 1.19 | 1.29 |
| P08249 | C93  | reversible | 1.03 | 1.46 | 1.23 | 0.77 | 1.38 | 1.45 |
| P08752 | C140 | reversible | 1.01 | 1.12 | 1.4  | 1.06 | NA   | NA   |
| P08752 | C255 | reversible | 0.93 | 1.41 | 1.25 | 0.82 | 1.05 | 1.05 |
| P08752 | C287 | reversible | 1.76 | 1.37 | 1.14 | 0.88 | NA   | 1    |
| P08752 | C66  | reversible | 1.03 | 0.92 | 0.7  | 0.51 | NA   | 0.89 |
| P09055 | C691 | reversible | 1.04 | NA   | 1.28 | 0.55 | NA   | 1.24 |

|        |       |            |      |      |      |      |      |      |
|--------|-------|------------|------|------|------|------|------|------|
| P09411 | C108  | reversible | 1.34 | 0.94 | 1.39 | NA   | NA   | 1.33 |
| P09411 | C99   | reversible | NA   | 1.53 | 0.92 | 0.96 | NA   | 0.98 |
| P09541 | C74   | reversible | 0.89 | NA   | 1.51 | 0.78 | NA   | 1.57 |
| P10126 | C234  | reversible | 0.89 | 2.01 | 1.7  | 1.46 | 1.41 | 0.95 |
| P10493 | C1230 | so3h       | 0.82 | 0.89 | 1.02 | 0.93 | 1.06 | NA   |
| P10493 | C1232 | so3h       | 0.82 | 0.89 | 1.02 | 0.93 | 1.06 | NA   |
| P10493 | C423  | reversible | 0.93 | 1.28 | 1.28 | 0.91 | 1.59 | 1    |
| P10493 | C616  | reversible | 0.98 | 0.8  | 0.98 | 0.84 | 0.85 | 0.97 |
| P10493 | C748  | reversible | 1    | 1.01 | 1.32 | 0.83 | 0.89 | 1.07 |
| P10493 | C985  | reversible | 0.91 | 0.74 | 1.1  | NA   | NA   | 0.98 |
| P11152 | C243  | reversible | 1.05 | 0.87 | 0.92 | 0.61 | NA   | 1.3  |
| P11276 | C374  | reversible | 1.22 | NA   | 1.9  | 1.72 | 1.14 | NA   |
| P11276 | C420  | reversible | 1.22 | 2.13 | 1.67 | 1.57 | 1.56 | NA   |
| P11499 | C521  | reversible | 0.95 | 1.84 | 0.69 | 1.11 | NA   | 1.04 |
| P12382 | C351  | reversible | 1.01 | 1.5  | 1.11 | 0.88 | 1.31 | 1.32 |
| P12382 | C708  | reversible | 0.99 | 1.03 | 1.19 | 1.37 | 1.11 | 1.21 |
| P13020 | C329  | reversible | 0.96 | 1.42 | 1.25 | 0.85 | NA   | 1.28 |
| P13020 | C670  | reversible | 1.08 | 1.21 | 1.59 | 1.28 | NA   | 1.14 |
| P14094 | C126  | reversible | 1.08 | 0.94 | 0.88 | 0.61 | 1.1  | 0.89 |
| P14094 | C159  | reversible | 1.15 | 0.69 | 0.92 | 0.95 | 0.86 | NA   |
| P14094 | C175  | reversible | 1.03 | 1.24 | 1.23 | 0.81 | 0.89 | 0.78 |
| P14094 | C214  | reversible | 0.85 | 0.98 | 1.05 | 0.89 | 0.75 | 0.9  |
| P14152 | C137  | reversible | 1.15 | 1.73 | 1.3  | 0.78 | 1.77 | 1.66 |
| P14152 | C154  | reversible | 1.19 | 1.38 | 1.25 | 0.86 | 1.22 | 1.65 |
| P14211 | C137  | reversible | 1    | 1    | 1.4  | 0.69 | 0.92 | 0.93 |
| P14824 | C552  | reversible | 1.09 | 1.25 | 1.81 | 0.97 | 0.81 | 1.58 |
| P14824 | C669  | reversible | 0.99 | 1.14 | 1.63 | 0.86 | 1    | 1.74 |
| P16045 | C61   | reversible | 1.1  | 1.24 | 1.12 | 0.72 | 1.14 | 1.12 |
| P16125 | C294  | reversible | 1.19 | 0.67 | 0.89 | NA   | 0.91 | 0.76 |
| P16858 | C150  | reversible | 0.99 | 1.48 | 1.03 | 1.22 | 1.24 | 1.53 |
| P16858 | C154  | reversible | 1.29 | 1.34 | 0.96 | 1.23 | 1.11 | 1.46 |
| P16858 | C22   | reversible | 1.02 | 1    | 0.85 | 0.91 | 1.12 | 1.25 |
| P16858 | C245  | reversible | 1.03 | 1.38 | 1.1  | 1.44 | 1.52 | 1.45 |
| P17182 | C337  | reversible | 0.85 | 1.26 | 2    | 1.59 | NA   | 1.26 |
| P17182 | C339  | reversible | 1.13 | 1.24 | 1.2  | 1.06 | NA   | 0.83 |
| P17563 | C268  | reversible | 1.07 | 1.17 | 1.25 | 1.04 | 1.16 | 1.43 |
| P17563 | C31   | reversible | 1.08 | 0.97 | 0.96 | 0.93 | 1.04 | 1.4  |
| P17563 | C371  | reversible | 1.05 | 0.87 | 0.86 | 0.74 | 0.93 | 1.21 |
| P17710 | C684  | reversible | 1.14 | 0.98 | 0.77 | 0.87 | 0.96 | 1.03 |

|        |       |            |      |      |      |      |      |      |
|--------|-------|------------|------|------|------|------|------|------|
| P17710 | C869  | reversible | 1.05 | 1.17 | 0.69 | 0.96 | NA   | 0.43 |
| P17742 | C161  | reversible | 1.22 | 1.16 | 1.47 | 0.78 | 1.1  | 1.14 |
| P17742 | C62   | reversible | 1.23 | 1.23 | 1.74 | 0.85 | 1.19 | 1    |
| P17751 | C117  | reversible | 0.94 | NA   | 1.58 | 0.74 | NA   | 1.38 |
| P17751 | C268  | reversible | 1.17 | 1.73 | 1.33 | 1.07 | 1.16 | 1.89 |
| P18242 | C117  | reversible | 0.99 | 0.72 | 1.06 | 1.32 | NA   | 1.07 |
| P18242 | C288  | reversible | 1    | 0.82 | 0.96 | 1    | 0.73 | 1.12 |
| P18242 | C327  | reversible | 0.8  | 0.92 | 1.02 | 0.74 | 0.94 | 0.9  |
| P19221 | C104  | reversible | 0.86 | NA   | 1.35 | 1.16 | 1.02 | NA   |
| P19221 | C264  | reversible | 0.96 | 1.09 | 1.17 | 1.27 | 0.85 | 1.01 |
| P19221 | C333  | reversible | 0.97 | 0.98 | 1.44 | 1.14 | 1.09 | 1.01 |
| P19221 | C388  | reversible | 0.77 | 1.01 | 0.99 | 1.14 | 1.1  | 1.03 |
| P20108 | C230  | reversible | 0.92 | 0.98 | 0.91 | 0.88 | 0.83 | 1.26 |
| P20918 | C103  | reversible | 1.18 | 1.4  | 0.97 | 1.27 | 1.11 | 1.98 |
| P20918 | C49   | reversible | 1.19 | 0.9  | 1.42 | 1.28 | 1.02 | 1.27 |
| P20918 | C586  | reversible | 1.11 | 1.24 | 1.31 | 1.1  | 1.03 | NA   |
| P21550 | C337  | reversible | 1.05 | 1.42 | 1.5  | 1.09 | 1.94 | 1.56 |
| P21550 | C339  | reversible | 1.32 | 1.4  | 1.72 | 1.06 | NA   | 1.85 |
| P21614 | C220  | reversible | 1.27 | 1.13 | 1.46 | 0.96 | 1.1  | 1.47 |
| P21956 | C290  | reversible | 1.09 | 1.21 | 1.1  | 1.05 | NA   | 1.18 |
| P21956 | C303  | reversible | 1.32 | 1.26 | 0.95 | 0.85 | NA   | NA   |
| P21981 | C619  | reversible | 1.03 | 1.72 | 1    | 1.28 | 0.94 | 0.9  |
| P23242 | C198  | reversible | 1.02 | 0.83 | 0.93 | 0.82 | NA   | 0.86 |
| P23953 | C116  | reversible | 0.68 | 1.3  | 1.72 | NA   | 1.12 | NA   |
| P24270 | C232  | reversible | 1.26 | 0.8  | 1    | 0.89 | 0.99 | 0.81 |
| P24270 | C377  | reversible | 1.21 | 1.23 | 1.34 | 0.99 | 1.48 | 1.03 |
| P24270 | C425  | reversible | 1.4  | 1.26 | 1.03 | 1.25 | 1    | 1    |
| P25444 | C229  | reversible | 1.1  | 1.3  | 1.76 | 1.25 | 1.33 | 1.33 |
| P26040 | C117  | reversible | 0.96 | 2.04 | NA   | 1.05 | NA   | 0.89 |
| P26262 | C419  | reversible | 0.99 | 1.18 | 1.25 | 0.9  | 0.91 | 0.8  |
| P26443 | C112  | reversible | 0.93 | 1.23 | 1.39 | 1.3  | 1.36 | 1.14 |
| P26638 | C300  | reversible | 1.08 | 1.5  | 1.31 | 1.32 | 1.25 | 1.07 |
| P27773 | C85   | reversible | 0.84 | 1.08 | 1.25 | 1.36 | NA   | NA   |
| P28474 | C240  | reversible | 0.96 | 0.95 | 0.84 | 1.01 | 1.08 | 0.83 |
| P28665 | C1129 | reversible | 0.87 | 1.13 | 1.21 | 0.95 | 1.1  | NA   |
| P28665 | C276  | reversible | 0.92 | 1.63 | 1.01 | 0.97 | 1.42 | 1.47 |
| P28665 | C587  | reversible | 0.89 | 1.95 | 1.02 | 1.03 | 1.67 | 1.35 |
| P28665 | C680  | reversible | 0.96 | 1.75 | 1.19 | 1.22 | 1.77 | 1.83 |
| P28665 | C86   | reversible | 1.05 | 1.52 | 0.84 | 0.92 | 1.05 | 1.41 |

|        |      |            |      |      |      |      |      |      |
|--------|------|------------|------|------|------|------|------|------|
| P28665 | C923 | reversible | 1.03 | 1.14 | 0.85 | 1.03 | 0.85 | 1.24 |
| P29758 | C150 | reversible | 1.05 | 1.15 | 1.01 | 0.82 | 0.9  | 0.89 |
| P32261 | C54  | reversible | 0.81 | 0.98 | 0.96 | 0.8  | NA   | NA   |
| P34914 | C120 | reversible | 0.86 | 1.5  | 1.33 | 1    | NA   | NA   |
| P34914 | C230 | reversible | 1.09 | 0.89 | 1.14 | 0.83 | NA   | 1.12 |
| P35486 | C181 | reversible | 1.06 | 1.12 | 1.15 | 1.04 | 1.09 | 1.41 |
| P35486 | C218 | reversible | 0.93 | 2.04 | 0.97 | 1.07 | 2.03 | 1.08 |
| P35486 | C222 | reversible | 1.18 | 1.2  | 1.2  | 1.02 | 1.67 | 1.17 |
| P35486 | C261 | reversible | 1.06 | 1.13 | 0.8  | 0.99 | 1.03 | 1.04 |
| P35486 | C273 | reversible | 1.16 | 0.99 | 1.22 | 1.07 | 0.8  | 1.35 |
| P35762 | C156 | reversible | NA   | 1.53 | 0.93 | 1.32 | 0.76 | 1.02 |
| P35762 | C157 | reversible | 1.59 | 1.32 | 1.07 | NA   | 0.6  | NA   |
| P35762 | C175 | reversible | 0.81 | 1.18 | 1.15 | 1.05 | NA   | 1.2  |
| P35979 | C141 | reversible | 1.29 | NA   | 1.55 | 0.98 | NA   | 0.89 |
| P38647 | C608 | reversible | 0.9  | 0.89 | 0.82 | 1.11 | 1.15 | 1.06 |
| P40124 | C92  | reversible | 0.93 | 0.96 | 1.8  | 1.65 | NA   | 1.18 |
| P41216 | C133 | reversible | 1.08 | 0.92 | 0.85 | 0.87 | 0.68 | 0.96 |
| P41216 | C242 | reversible | 0.71 | NA   | 0.98 | 1.4  | NA   | 0.78 |
| P41216 | C298 | reversible | 0.94 | 0.76 | 0.94 | 0.82 | 0.84 | 0.89 |
| P41216 | C510 | reversible | 0.98 | 0.7  | 0.86 | 0.74 | 0.77 | 0.92 |
| P41216 | C55  | reversible | 0.85 | 0.83 | 0.99 | 0.96 | 1.03 | 0.99 |
| P41216 | C626 | reversible | 1    | 0.91 | 0.9  | 0.98 | 0.81 | 0.82 |
| P42208 | C111 | reversible | NA   | 1.17 | 1.34 | 0.82 | 1.31 | 1.31 |
| P45376 | C187 | reversible | 1.14 | 1.18 | 0.8  | 0.62 | 0.6  | 1.24 |
| P45376 | C200 | reversible | 1.1  | 0.79 | 0.84 | 0.86 | 0.7  | 1.15 |
| P45376 | C304 | reversible | 1.48 | 1    | 0.87 | 1.05 | 0.62 | 0.81 |
| P45377 | C200 | reversible | NA   | 0.97 | 1.03 | 1.35 | NA   | 1.03 |
| P45591 | C80  | reversible | 0.99 | 1.41 | 1.34 | 1.31 | 1.23 | 1.24 |
| P46412 | C156 | reversible | 0.93 | 1.42 | 1.34 | 1.2  | 1.57 | 1.27 |
| P46935 | C365 | reversible | 1.17 | 1.53 | 1.85 | NA   | NA   | 1.13 |
| P47738 | C388 | reversible | 1.17 | 0.99 | 1.07 | 0.78 | 0.8  | 1.17 |
| P47738 | C68  | reversible | 1.11 | 0.8  | 0.96 | 0.77 | 0.63 | 0.81 |
| P47857 | C114 | reversible | 1    | 1.28 | 1.02 | 0.97 | 1.1  | 1.14 |
| P47857 | C709 | reversible | 1.07 | 1.18 | 1.15 | 0.93 | 1.2  | 1.21 |
| P47934 | C449 | reversible | 1.07 | 1.16 | 0.88 | 0.9  | 1.07 | 0.83 |
| P48774 | C38  | reversible | 1.31 | 1.1  | 1.02 | NA   | 0.61 | NA   |
| P48962 | C129 | reversible | 0.92 | 0.9  | 0.98 | NA   | NA   | 0.79 |
| P48962 | C57  | reversible | 1.05 | 1.74 | 1.08 | 1.75 | 1.52 | 1.43 |
| P50136 | C194 | reversible | 1.16 | NA   | 1.14 | 0.92 | 0.86 | 0.83 |

|        |       |            |      |      |      |      |      |      |
|--------|-------|------------|------|------|------|------|------|------|
| P50247 | C195  | reversible | 1.21 | NA   | 1.61 | NA   | 1.9  | 1.92 |
| P50247 | C228  | reversible | 0.91 | NA   | 1.27 | NA   | 1.36 | 1.14 |
| P50396 | C302  | reversible | 1.13 | 1.27 | 1.4  | 1.58 | 0.86 | 1.58 |
| P50396 | C317  | reversible | NA   | 1.45 | NA   | 1.19 | 1.19 | 1.04 |
| P50462 | C79   | reversible | 1.46 | NA   | 1.28 | 0.96 | NA   | 0.84 |
| P50544 | C216  | reversible | 1.02 | 0.8  | 1.18 | 0.95 | NA   | 0.62 |
| P50544 | C238  | reversible | 1.09 | 1.09 | 1.16 | 0.98 | 1.04 | 0.82 |
| P50544 | C478  | reversible | 1.05 | 0.95 | 1.13 | 0.93 | 1.09 | 1.21 |
| P50544 | C604  | reversible | 0.85 | 0.89 | 1.76 | 1.35 | NA   | NA   |
| P51174 | C342  | reversible | 0.99 | 1    | 1.09 | 0.89 | 0.56 | 1.05 |
| P51174 | C351  | reversible | 0.93 | 1.01 | 1.01 | 0.75 | 1.22 | 1.04 |
| P52196 | C248  | reversible | 0.91 | 0.7  | 1.33 | 1.02 | 1.11 | 1.23 |
| P52480 | C326  | reversible | 0.97 | NA   | 0.91 | 1.46 | 1.11 | 1.28 |
| P52480 | C358  | reversible | 1.02 | 0.97 | 0.91 | 0.79 | 0.97 | 1.14 |
| P52480 | C474  | reversible | 1.07 | 1.25 | 1.06 | 1    | 1.15 | 1.11 |
| P52480 | C49   | reversible | 1.14 | 1.19 | 0.95 | 1.02 | 1.1  | 1.38 |
| P52503 | C107  | reversible | 1.24 | 1.12 | 1.55 | 1.62 | NA   | NA   |
| P52503 | C79   | reversible | 0.98 | 1.08 | 1.16 | 0.65 | 1.15 | 1.22 |
| P52825 | C489  | reversible | 0.93 | 1.04 | 1.06 | 0.82 | 0.94 | 0.96 |
| P52825 | C512  | reversible | 1.02 | 0.8  | 1.51 | NA   | 0.77 | NA   |
| P52825 | C84   | reversible | 1.4  | 0.74 | 1.23 | 1.98 | 0.7  | 0.8  |
| P53395 | C279  | reversible | 1.1  | 1.02 | 0.7  | 0.87 | 1.66 | 1.02 |
| P53395 | C333  | reversible | 1    | 1.27 | 1.07 | 0.92 | 0.75 | 0.8  |
| P54071 | C113  | reversible | 0.9  | 1.18 | 0.91 | 0.75 | 0.87 | 0.74 |
| P54071 | C154  | reversible | 0.94 | 2.34 | 2.44 | 9.2  | 0.95 | NA   |
| P54071 | C308  | reversible | 0.94 | 1.09 | 0.93 | 0.66 | 1.02 | 0.95 |
| P54071 | C402  | reversible | 1.05 | 1    | 0.91 | 0.6  | 0.98 | 1.04 |
| P54071 | C418  | reversible | 1.04 | 1.08 | 0.96 | 0.66 | 0.82 | 0.98 |
| P55066 | C1160 | so3h       | 0.81 | 0.96 | 1.44 | 1.01 | 1.07 | 1.27 |
| P55264 | C159  | reversible | 1.23 | 0.9  | 1.81 | 0.86 | NA   | NA   |
| P56382 | C19   | reversible | 1.18 | 1.2  | 1.19 | 0.74 | 1.14 | 1.27 |
| P56391 | C30   | reversible | 1.01 | 1.06 | 1.26 | 0.9  | NA   | NA   |
| P56391 | C54   | reversible | 0.99 | 1.63 | 1.25 | 0.91 | NA   | NA   |
| P58021 | C181  | reversible | 0.89 | 0.99 | 1.05 | 1.29 | NA   | NA   |
| P58021 | C193  | reversible | 0.94 | 1.42 | 1.09 | 1    | 0.79 | 0.99 |
| P58252 | C290  | reversible | 1.26 | 1.64 | 1.1  | 1.46 | 1.3  | 0.8  |
| P58252 | C41   | reversible | 1.08 | 1.64 | 0.78 | 1.31 | NA   | NA   |
| P58252 | C466  | reversible | NA   | 1.31 | 0.9  | NA   | 1.04 | 1.53 |
| P58252 | C567  | reversible | 1.22 | 1.26 | 0.9  | 0.95 | 1.04 | 1.02 |

|        |      |            |      |      |      |      |      |      |
|--------|------|------------|------|------|------|------|------|------|
| P58252 | C591 | reversible | 0.81 | 1.47 | NA   | 1.21 | NA   | 0.34 |
| P58252 | C693 | reversible | 1.08 | 1.08 | 1.09 | NA   | 0.89 | 0.82 |
| P58252 | C728 | reversible | 0.68 | 1.03 | 2.56 | NA   | 0.74 | 1.27 |
| P58281 | C786 | reversible | 0.91 | 0.94 | 0.66 | 0.86 | 0.82 | 0.91 |
| P58281 | C856 | reversible | NA   | NA   | 0.76 | 0.8  | 1.09 | 0.54 |
| P62242 | C174 | reversible | 1.22 | 2.04 | 1.43 | 1.2  | 1.19 | 1.59 |
| P62281 | C116 | reversible | 1.15 | NA   | 1.63 | 1.29 | NA   | 1.08 |
| P62631 | C326 | reversible | 1.11 | 0.99 | 0.94 | 0.92 | 0.64 | NA   |
| P62702 | C181 | reversible | 1.04 | 1.01 | 1.63 | 1.42 | NA   | NA   |
| P62702 | C41  | reversible | 0.94 | 2    | NA   | 1.49 | 1.94 | 0.97 |
| P62717 | C109 | reversible | 1.02 | NA   | 1.49 | 1.19 | 1.24 | 1.26 |
| P62737 | C219 | reversible | 0.95 | 1.08 | 1.02 | 1.16 | 1.47 | NA   |
| P62737 | C259 | reversible | 0.88 | 1.19 | 1.29 | 1.11 | 1.28 | NA   |
| P62754 | C12  | reversible | 1.25 | 2.15 | 1.5  | 1.32 | 1.44 | 1.05 |
| P62827 | C112 | reversible | 1.42 | 1.03 | 0.55 | 1.34 | NA   | 0.82 |
| P62908 | C119 | reversible | 0.98 | 1.29 | 1.66 | 1.18 | 0.94 | 1.01 |
| P62908 | C134 | reversible | 0.81 | NA   | 1.21 | 1.24 | 1.01 | NA   |
| P62908 | C97  | reversible | 1.49 | NA   | 1.46 | 1.38 | 1.11 | NA   |
| P63001 | C157 | reversible | 1.11 | 1.24 | 1.42 | 1.18 | 1.28 | 1.27 |
| P63001 | C178 | reversible | 1.03 | 1.51 | 1.06 | 1.14 | 1.13 | 1.29 |
| P63017 | C17  | reversible | 0.92 | 1    | 1.07 | 1.16 | NA   | 1.5  |
| P63017 | C603 | reversible | 1.1  | 1.16 | 1.11 | 0.94 | 1.39 | 1.29 |
| P63087 | C62  | reversible | NA   | 1.22 | 0.98 | 1    | NA   | 0.94 |
| P68033 | C219 | reversible | NA   | 1    | 1.4  | 1.09 | 0.97 | 1.21 |
| P68033 | C259 | reversible | 1.01 | 0.92 | 1.15 | NA   | 1.18 | 1.33 |
| P68040 | C182 | reversible | 1.11 | NA   | 1.47 | 1.29 | 1.27 | NA   |
| P68040 | C249 | reversible | 1.05 | 1.7  | 1.93 | 1.38 | 1.13 | 1.32 |
| P70404 | C148 | reversible | 1.01 | 0.95 | 0.89 | 1    | 1.19 | 1.27 |
| P70404 | C235 | reversible | 0.94 | 1.21 | 1.03 | 0.83 | 1.49 | 1.27 |
| P70404 | C236 | reversible | 0.95 | 1.15 | 0.79 | 1.06 | 1.07 | 1.09 |
| P70404 | C333 | reversible | 1.11 | 1.2  | 1.27 | 1.34 | 1.33 | 1.11 |
| P70670 | C354 | reversible | 1.13 | 1.44 | 1.36 | 0.96 | 1.22 | 0.8  |
| P97351 | C201 | reversible | 1.19 | 2.09 | 1.49 | 1.03 | 3.04 | 1.55 |
| P97351 | C96  | reversible | 1.04 | 1.47 | 1.37 | 1.38 | 1.14 | 0.98 |
| P97370 | C170 | reversible | 0.86 | 0.97 | 1.03 | 0.82 | NA   | NA   |
| P97370 | C191 | reversible | 0.81 | 0.88 | 1.13 | 1.18 | 1.04 | 1.16 |
| P97370 | C249 | reversible | 1.04 | 0.89 | 0.94 | 0.72 | 0.87 | 0.79 |
| P97443 | C125 | reversible | 1.04 | 0.99 | 0.73 | 0.78 | 0.84 | 0.96 |
| P97447 | C273 | reversible | NA   | 1.24 | 2.12 | 2.24 | NA   | 1.79 |



|        |       |            |      |      |      |      |      |      |
|--------|-------|------------|------|------|------|------|------|------|
| P97467 | C226  | reversible | 0.79 | 0.85 | 1.63 | NA   | 1.64 | 1.32 |
| P97467 | C292  | reversible | 0.99 | 0.9  | 1.1  | 6.96 | 1.12 | 0.77 |
| P97467 | C46   | reversible | 0.75 | 1.1  | 1.67 | 1.92 | 1.23 | 0.9  |
| P97927 | C1222 | reversible | NA   | NA   | 1.54 | 0.98 | 1.06 | 1.39 |
| Q01768 | C109  | reversible | 1.1  | 1.09 | 1.28 | 0.84 | 1.17 | 1.27 |
| Q01853 | C105  | reversible | 1.25 | 1.21 | 1.25 | 1.16 | 1.15 | 1.29 |
| Q01853 | C209  | reversible | 1.18 | 1.06 | 1.21 | NA   | 1.06 | 0.58 |
| Q01853 | C522  | reversible | 1.16 | 1.54 | 1.45 | 1.31 | 1.43 | 1.46 |
| Q01853 | C572  | reversible | 1.06 | 1.24 | 1.26 | 1.31 | 1.11 | 1.09 |
| Q01853 | C691  | reversible | 1.59 | 1.43 | 1.34 | 1.73 | NA   | 0.93 |
| Q02053 | C481  | reversible | 1.17 | 1.13 | 1.44 | 1.2  | 1.35 | NA   |
| Q02566 | C1750 | reversible | 0.91 | 1.55 | 0.83 | 0.71 | 1.06 | 0.72 |
| Q02566 | C37   | reversible | 1    | 1.86 | 0.54 | 0.73 | 0.73 | 0.89 |
| Q02566 | C949  | reversible | 0.88 | NA   | 0.92 | NA   | 0.83 | 0.77 |
| Q03265 | C244  | reversible | 0.92 | 1.27 | 1.52 | 1.26 | 1.35 | 1.14 |
| Q04447 | C146  | reversible | 1.16 | 1.53 | NA   | NA   | 2.41 | 1.61 |
| Q04447 | C254  | reversible | 0.89 | 1.68 | 2.01 | 1.27 | 1.9  | 1.29 |
| Q05793 | C1156 | reversible | 0.72 | 1.09 | 1.01 | 0.99 | 0.98 | 0.7  |
| Q05793 | C2313 | reversible | 0.98 | NA   | 1.1  | 0.63 | 0.98 | 1.29 |
| Q05793 | C2456 | reversible | 0.7  | NA   | 1    | 0.88 | 1.09 | 1    |
| Q05793 | C3137 | reversible | 0.89 | 1.05 | 1.21 | 1.07 | 1.12 | 0.95 |
| Q05793 | C731  | reversible | 0.93 | 1.25 | 1.06 | 0.9  | 1.04 | 0.86 |
| Q05793 | C811  | reversible | 0.68 | 1.34 | NA   | 1.03 | 1.24 | 1.04 |
| Q05793 | C892  | reversible | 0.86 | 1.26 | 1.22 | 0.93 | 1.18 | 0.9  |
| Q05BC3 | C769  | reversible | 1.37 | 1.1  | 1.37 | 1.24 | NA   | NA   |
| Q07113 | C513  | reversible | 0.84 | 1.37 | 1.46 | 1.16 | 1.8  | 1.26 |
| Q07113 | C724  | reversible | 0.92 | 1.3  | 1.27 | 1.25 | 1.01 | 0.84 |
| Q07113 | C807  | reversible | 1.06 | 1.06 | 1.24 | 1.29 | 1.2  | NA   |
| Q07113 | C886  | reversible | 1    | 1.3  | 1.38 | 1.22 | 0.99 | 1.07 |
| Q07417 | C151  | reversible | 0.98 | 1.08 | 1.26 | 1.02 | 1.47 | 1.29 |
| Q07417 | C289  | reversible | 1.85 | 1.18 | 1.08 | NA   | 0.99 | 1.12 |
| Q07456 | C336  | reversible | 1.02 | 1.23 | 1.89 | 1.51 | 0.94 | NA   |
| Q08481 | C470  | reversible | 1.48 | 1.21 | 1.26 | 1.07 | 1.09 | 1.09 |
| Q08857 | C272  | reversible | 0.99 | 0.99 | 0.81 | 0.74 | 0.87 | 1.12 |
| Q08857 | C311  | reversible | 1.01 | 1.28 | 1.42 | 0.91 | NA   | 1.11 |
| Q1XH17 | C105  | reversible | 1.19 | 1.25 | 0.97 | 0.72 | 1.17 | 1.08 |
| Q1XH17 | C108  | reversible | 1.06 | NA   | 0.71 | 0.55 | NA   | 0.92 |
| Q1XH17 | C242  | reversible | 1.18 | 1.15 | 0.84 | 0.97 | 1.18 | 1.24 |
| Q2TPA8 | C11   | reversible | 1.07 | 0.74 | 1.31 | 0.78 | 0.53 | NA   |

|        |       |            |      |      |      |      |      |      |
|--------|-------|------------|------|------|------|------|------|------|
| Q2TPA8 | C218  | reversible | 0.94 | 0.77 | 0.95 | 0.92 | 0.67 | 0.9  |
| Q3TC72 | C110  | reversible | 0.98 | 0.81 | 1.11 | 1.03 | NA   | 0.9  |
| Q3TC72 | C119  | reversible | 0.89 | 0.77 | NA   | 0.98 | 0.92 | NA   |
| Q3TC72 | C214  | reversible | 1.07 | 0.66 | 0.94 | 1.22 | 1.21 | NA   |
| Q3U269 | C354  | reversible | 0.75 | 0.93 | NA   | NA   | 0.79 | 0.85 |
| Q3ULD5 | C167  | reversible | 1    | 1.05 | 1.15 | 1    | 0.99 | 1.22 |
| Q3ULD5 | C267  | reversible | 1.13 | 0.79 | 0.98 | 0.93 | 0.82 | NA   |
| Q3ULD5 | C391  | reversible | 1.28 | 1.12 | 1.14 | 0.74 | 0.89 | 1.36 |
| Q3ULD5 | C392  | reversible | 1.13 | 1.23 | 1.86 | 1.23 | 1.09 | 1    |
| Q3ULD5 | C431  | reversible | 1.39 | 0.75 | 1.15 | 1.16 | 1.23 | 1.27 |
| Q3V1T4 | C571  | reversible | 0.94 | NA   | 1.43 | 1.67 | NA   | 0.96 |
| Q3V3R4 | C130  | reversible | 0.91 | 0.99 | NA   | 0.97 | NA   | 0.55 |
| Q4FZG7 | C66   | so3h       | 0.81 | 1.81 | 0.79 | 0.81 | NA   | NA   |
| Q60597 | C395  | reversible | 1.04 | 0.96 | 0.95 | 0.75 | 0.94 | 0.94 |
| Q60597 | C487  | reversible | 1.05 | 1    | 1.04 | 1.17 | 0.75 | 0.97 |
| Q60597 | C566  | reversible | 1.06 | 1.18 | 1.21 | 0.89 | 1.2  | 1.14 |
| Q60597 | C904  | reversible | 1.1  | 1.21 | 1.1  | 0.87 | 1.22 | 1.27 |
| Q60675 | C1141 | reversible | 0.91 | 1.03 | 1.26 | 0.87 | 0.89 | 0.62 |
| Q60675 | C1447 | reversible | 0.75 | 0.73 | 0.72 | 0.6  | NA   | 0.67 |
| Q60675 | C1502 | reversible | 1.03 | 0.99 | 1.7  | 0.74 | 1.05 | 0.81 |
| Q60675 | C1544 | reversible | 0.22 | 1.1  | 1.11 | 0.95 | 1.07 | NA   |
| Q60675 | C2905 | reversible | 0.95 | 0.37 | 0.95 | 0.74 | NA   | 0.71 |
| Q60675 | C349  | reversible | 0.98 | 0.85 | 1.08 | 0.96 | 0.81 | NA   |
| Q60675 | C493  | reversible | 0.9  | 0.85 | 1.14 | 0.78 | 0.97 | 0.88 |
| Q60692 | C76   | reversible | 1.02 | 1.41 | 1.49 | 1.23 | 1.84 | NA   |
| Q60759 | C176  | reversible | 1.55 | 0.81 | 1.2  | 1.01 | 1.13 | NA   |
| Q60854 | C102  | reversible | 1.26 | 1.08 | 1.28 | 0.98 | NA   | 1.4  |
| Q60854 | C352  | reversible | 0.97 | 1.2  | 1.09 | 1.45 | NA   | 1.13 |
| Q60864 | C461  | reversible | 1.03 | 0.67 | NA   | NA   | 0.9  | 1.27 |
| Q60930 | C48   | reversible | 1.06 | 1.09 | 1.08 | 1.1  | 0.75 | 1.53 |
| Q60930 | C77   | reversible | 1.1  | 1.28 | 1.22 | 1    | NA   | 1.12 |
| Q60931 | C65   | reversible | 1.06 | 1.01 | 1.07 | 0.97 | 0.99 | 1.38 |
| Q60932 | C140  | reversible | 1.01 | 0.94 | 0.85 | 0.78 | 0.95 | 1.36 |
| Q60932 | C245  | reversible | 1.19 | 0.92 | 0.97 | 0.91 | 0.97 | 1.43 |
| Q60936 | C265  | reversible | 0.73 | 1.05 | 1.32 | 0.64 | 0.81 | 0.76 |
| Q60936 | C403  | reversible | 0.93 | 0.9  | 0.93 | 0.86 | 0.62 | 1.06 |
| Q61129 | C96   | reversible | 0.83 | 1.19 | 1.33 | 0.91 | 0.68 | NA   |
| Q61147 | C199  | reversible | 1.15 | 1.36 | 1.51 | 1.23 | 1.61 | 1.16 |
| Q61147 | C713  | reversible | 0.94 | 1.4  | 1.55 | 1.65 | 1.47 | 1.33 |

|        |       |            |      |      |      |      |      |      |
|--------|-------|------------|------|------|------|------|------|------|
| Q61147 | C895  | reversible | 1.05 | 1.17 | 1.25 | 1.01 | 1.11 | 1.14 |
| Q61292 | C185  | reversible | 0.89 | 1.12 | 1.07 | 0.82 | 1.29 | 1    |
| Q61292 | C505  | reversible | 0.77 | 0.89 | 0.95 | NA   | NA   | 0.88 |
| Q61292 | C906  | reversible | 0.86 | 0.88 | 0.9  | 0.72 | 1.07 | NA   |
| Q61316 | C140  | reversible | 1.13 | 1.27 | 1.22 | 1.15 | NA   | 1.18 |
| Q61316 | C380  | reversible | 0.96 | 1.32 | 1.37 | 1.19 | 1.21 | NA   |
| Q61316 | C780  | reversible | 1.26 | 1.24 | 1.39 | 1.24 | 1.07 | 1.07 |
| Q61425 | C201  | reversible | 1    | 0.92 | 0.95 | 0.81 | 0.92 | 1.03 |
| Q61425 | C99   | reversible | 1.05 | 1.02 | 1.41 | NA   | 0.6  | NA   |
| Q61543 | C320  | reversible | 0.93 | 1.23 | 1.49 | 0.58 | 0.89 | 0.81 |
| Q61554 | C1847 | reversible | 1.24 | 1.73 | 1.27 | 1.41 | 1.39 | 1.59 |
| Q61554 | C2251 | reversible | 1.01 | 1.83 | 1.76 | 1.42 | NA   | NA   |
| Q61554 | C2413 | reversible | 1    | 1.71 | 1.7  | 1.2  | 1.34 | 1.34 |
| Q61554 | C460  | reversible | 1.05 | 1.85 | 1.46 | 1.45 | 1.42 | 1.01 |
| Q61554 | C845  | reversible | 1.2  | NA   | 1.29 | 1.96 | 1.11 | NA   |
| Q61554 | C967  | reversible | 1.14 | 1.81 | 1.63 | 1.32 | 1.23 | NA   |
| Q61598 | C282  | reversible | 0.94 | 1.07 | 1.07 | 0.86 | 0.98 | 0.77 |
| Q61598 | C302  | reversible | 1.21 | 1.17 | 1.47 | 1.48 | 1.17 | 1.49 |
| Q61598 | C414  | reversible | 1.24 | 0.98 | 1.24 | 0.65 | 0.92 | NA   |
| Q61702 | C265  | reversible | 1.05 | 1.63 | 2    | NA   | 1.48 | 1.06 |
| Q61738 | C546  | reversible | 1.06 | NA   | 1.01 | 0.88 | 0.8  | NA   |
| Q61738 | C687  | reversible | 0.88 | 1.16 | 1.22 | 1.02 | 0.91 | 1.09 |
| Q61739 | C154  | reversible | 0.77 | 1.05 | 1.02 | NA   | 1.13 | 0.64 |
| Q61739 | C881  | reversible | 1.06 | 0.91 | 1.05 | NA   | 0.8  | 1.13 |
| Q61830 | C149  | reversible | 0.95 | 1.15 | 1.4  | 1.24 | 1.18 | 1.07 |
| Q61830 | C209  | reversible | 1.13 | 1.61 | 1.83 | 1.49 | 1.94 | 1.39 |
| Q61830 | C391  | reversible | 0.97 | 1.19 | 1.27 | NA   | 1.19 | 1.31 |
| Q61838 | C340  | reversible | 1.03 | 1.33 | 1.7  | 1.26 | 1.66 | 0.93 |
| Q61838 | C642  | reversible | 1.1  | 0.81 | 1.47 | 0.81 | 0.77 | 0.62 |
| Q61838 | C833  | reversible | 1.12 | 1.37 | 1.31 | 0.91 | 1.59 | 1.26 |
| Q63961 | C209  | reversible | 1.21 | 1.05 | NA   | 1.46 | 0.95 | 0.99 |
| Q64669 | C180  | reversible | 0.93 | 1    | NA   | 1.28 | 1.14 | NA   |
| Q6DIB5 | C615  | reversible | NA   | 1.28 | 1.16 | NA   | 0.87 | 1.59 |
| Q6IRU2 | C154  | reversible | 1    | 2.38 | 1    | NA   | NA   | 1.27 |
| Q6NVE9 | C130  | reversible | 1.06 | 1.1  | 1.47 | 1.47 | 1.32 | 0.99 |
| Q6P3A8 | C226  | reversible | 0.67 | NA   | 1.09 | 0.88 | 0.98 | 1.07 |
| Q6P3A8 | C233  | reversible | 0.96 | 1.01 | 0.96 | 1.07 | 1.08 | 0.83 |
| Q6P3A8 | C297  | reversible | 1    | 1.91 | 1.03 | 1.02 | 1.33 | 0.87 |
| Q6P4U0 | C864  | so2h       | 0.84 | 1.09 | 1.23 | 0.79 | 1.06 | 1.04 |

|        |       |            |      |      |      |      |      |      |
|--------|-------|------------|------|------|------|------|------|------|
| Q6P5E4 | C159  | reversible | 0.67 | 1.13 | 1.21 | NA   | 1.18 | NA   |
| Q6P8J7 | C180  | reversible | 1.11 | 1.19 | 1.22 | 1.08 | 1.1  | 1.54 |
| Q6P8J7 | C238  | reversible | 1.14 | 1.11 | 1.22 | 0.91 | 1.01 | 1.36 |
| Q6P8J7 | C317  | reversible | 0.98 | 1.64 | 1.38 | 0.92 | 1.45 | 1.43 |
| Q6P8J7 | C317  | so3h       | 0.87 | NA   | 1.66 | NA   | 1.13 | 0.79 |
| Q6P8J7 | C63   | reversible | 0.89 | 0.43 | 1.08 | 0.97 | NA   | 0.88 |
| Q6P8J7 | C90   | reversible | 1.16 | 0.89 | 1.01 | 1.13 | 1.01 | 1.34 |
| Q6PB66 | C1042 | reversible | 1.14 | 1.25 | 1.06 | NA   | NA   | 1.14 |
| Q6PB66 | C112  | reversible | 1.28 | 0.82 | 0.82 | 1.11 | NA   | 0.82 |
| Q6PB66 | C626  | reversible | 1.19 | NA   | 0.6  | 0.92 | 0.85 | 1.22 |
| Q6PB66 | C847  | reversible | 0.89 | 0.91 | 1.04 | 0.74 | NA   | 0.93 |
| Q6PDM2 | C16   | reversible | 1.19 | 1.21 | 1.58 | 0.86 | 1.05 | NA   |
| Q6PIE5 | C702  | reversible | 1.06 | 1.2  | 1.15 | 1.03 | NA   | NA   |
| Q6ZWY3 | C77   | reversible | 1.02 | NA   | NA   | 1    | 1.43 | 1.01 |
| Q71RI9 | C417  | reversible | NA   | 1.09 | 1.25 | 0.92 | 1.75 | NA   |
| Q791V5 | C49   | reversible | 0.98 | 1.11 | 1.1  | 0.8  | 1.17 | 1.25 |
| Q791V5 | C56   | reversible | 1.01 | 0.99 | 1.03 | 1.04 | 1.04 | 1.46 |
| Q791V5 | C79   | reversible | 1.06 | 1.1  | 1.2  | 0.99 | 1.17 | 1.63 |
| Q7M760 | C104  | reversible | NA   | 1.14 | 0.86 | 0.58 | 1.1  | 0.75 |
| Q7TMF3 | C92   | reversible | 1.15 | 0.96 | 1.05 | 1.16 | 1.18 | 1.29 |
| Q7TMK9 | C289  | reversible | 1.32 | 1.54 | 1.14 | 1.08 | NA   | NA   |
| Q7TNG5 | C605  | reversible | 0.98 | NA   | 1.14 | NA   | 1.1  | 1.29 |
| Q7TQ48 | C863  | reversible | 1.12 | 0.62 | 1.35 | 0.64 | NA   | NA   |
| Q7TQ48 | C894  | reversible | 0.99 | 0.85 | 1.27 | 0.75 | 1.16 | 1.29 |
| Q7TQ48 | C899  | reversible | 0.67 | 0.83 | 0.62 | 0.77 | 0.67 | NA   |
| Q7TSQ8 | C84   | reversible | 1.09 | 1.33 | 1.11 | 0.84 | NA   | 1.07 |
| Q80TZ3 | C372  | reversible | NA   | NA   | 0.7  | 0.82 | 0.77 | 0.75 |
| Q80VJ8 | C368  | reversible | 0.76 | 1.1  | 1.95 | 1.01 | 1.23 | 0.72 |
| Q80XL6 | C635  | so3h       | 0.83 | 0.84 | NA   | 0.86 | 1.26 | NA   |
| Q80XN0 | C221  | reversible | 0.68 | 1.72 | 0.92 | 1.58 | 2.53 | 2.32 |
| Q80YC5 | C47   | reversible | 0.95 | 1.03 | 1.35 | 1.1  | 1.08 | NA   |
| Q8BFR5 | C222  | reversible | 1.19 | 1.43 | 0.95 | 0.82 | 1.38 | 1.26 |
| Q8BFR5 | C290  | reversible | 1.06 | 1.19 | 0.95 | 0.9  | 1.44 | 1.09 |
| Q8BGC4 | C330  | reversible | 1.17 | 1.19 | 1.24 | 1.24 | NA   | 0.81 |
| Q8BGH2 | C65   | reversible | 1.03 | 0.81 | 0.84 | 0.84 | 0.94 | 0.93 |
| Q8BGK2 | C206  | reversible | 0.99 | NA   | 0.54 | 0.62 | NA   | 0.86 |
| Q8BH35 | C199  | reversible | 0.66 | 0.65 | 0.89 | 1.2  | 1.08 | 1.26 |
| Q8BH59 | C435  | reversible | 0.92 | 0.82 | 1.17 | NA   | 1.07 | 0.74 |
| Q8BH59 | C563  | reversible | 0.95 | NA   | 1.32 | 0.96 | NA   | 1.27 |

|        |       |            |      |      |      |      |      |      |
|--------|-------|------------|------|------|------|------|------|------|
| Q8BH95 | C111  | reversible | 1.22 | 1.57 | 1.56 | 0.59 | 1.32 | 1.28 |
| Q8BH95 | C225  | reversible | 1    | 1.11 | 1.19 | 2.62 | NA   | NA   |
| Q8BHT6 | C402  | reversible | NA   | 1.15 | 0.97 | 1.38 | NA   | 0.83 |
| Q8BLF1 | C345  | reversible | 0.85 | 1.01 | 1.2  | 1.19 | 1.05 | 1.41 |
| Q8BMF3 | C450  | reversible | NA   | 0.8  | 1.02 | 0.89 | 1.04 | 0.92 |
| Q8BMF4 | C163  | reversible | NA   | 1.51 | 0.61 | 1.07 | NA   | 0.93 |
| Q8BMF4 | C290  | reversible | 1.11 | 1.17 | 1.23 | 0.93 | NA   | 1.54 |
| Q8BMF4 | C483  | reversible | 0.98 | 1.31 | 1.21 | 0.82 | 1.08 | 1.24 |
| Q8BMF4 | C581  | reversible | 1.09 | 0.96 | 1.16 | 0.79 | 1.9  | 1.66 |
| Q8BMS1 | C349  | reversible | 1.03 | 1.17 | 1.34 | 0.93 | 1.15 | 1.15 |
| Q8BMS1 | C470  | reversible | 1.13 | 1.07 | 0.92 | 0.83 | 0.78 | 0.97 |
| Q8BMS1 | C747  | reversible | 1.12 | 1.05 | 1.29 | 0.77 | 1    | 1.2  |
| Q8BW75 | C26   | reversible | 1.15 | 0.89 | 1.34 | 1.56 | NA   | 1    |
| Q8BWF0 | C260  | reversible | 1    | NA   | 0.74 | 0.98 | NA   | 1.32 |
| Q8BWF0 | C81   | reversible | 1.12 | 1.22 | 0.9  | 1.05 | 0.94 | 1.1  |
| Q8BWT1 | C103  | reversible | 0.77 | 0.94 | 1.3  | 0.91 | NA   | 0.71 |
| Q8BWT1 | C107  | reversible | 0.87 | 1.08 | 1.01 | 0.99 | 1.61 | 1.06 |
| Q8BWT1 | C287  | reversible | 0.9  | 1.24 | 1.26 | 0.96 | 1.52 | 0.92 |
| Q8BWT1 | C92   | reversible | 1.06 | 1.12 | 1.19 | 0.82 | 1.1  | 0.51 |
| Q8BY89 | C401  | reversible | 0.88 | NA   | 1.12 | 0.55 | NA   | 0.82 |
| Q8C522 | C34   | reversible | NA   | 0.85 | 1.25 | 1.17 | NA   | 1.15 |
| Q8CEE7 | C69   | reversible | NA   | NA   | 0.95 | 0.86 | 1.49 | 1.41 |
| Q8CFX1 | C376  | reversible | 1.21 | 1.4  | 1.5  | 1.09 | 1.07 | 1.24 |
| Q8CGC7 | C1076 | reversible | 0.91 | NA   | 1    | 0.81 | NA   | 0.53 |
| Q8CGC7 | C697  | reversible | 1.22 | 1.12 | 1.46 | 0.97 | NA   | 1.22 |
| Q8CGK3 | C898  | reversible | 0.73 | 1.11 | 1    | 0.8  | 1.09 | 0.99 |
| Q8CI94 | C326  | reversible | 0.77 | NA   | 1.06 | 0.93 | 0.97 | 1.17 |
| Q8CI94 | C373  | reversible | 1.12 | 1.07 | 1.04 | 0.87 | 1.21 | 1.52 |
| Q8CI94 | C437  | reversible | 1.05 | 1.05 | 1.03 | 0.64 | 1    | 0.83 |
| Q8CI94 | C446  | reversible | 0.98 | 1.85 | 1.03 | 0.94 | 1.78 | 1.28 |
| Q8CI94 | C581  | reversible | 1.68 | 1.16 | 1.41 | NA   | 1.16 | 2.35 |
| Q8JZN5 | C275  | reversible | 1.12 | 0.98 | 1.01 | 0.77 | 0.85 | 0.88 |
| Q8JZN5 | C617  | reversible | 1.08 | 1.17 | 1.13 | 0.77 | 1.13 | 1.04 |
| Q8JZQ2 | C401  | reversible | NA   | 1.23 | 0.9  | 0.75 | NA   | 1.12 |
| Q8K010 | C408  | reversible | 1.03 | 1.04 | 1.23 | 1.01 | 1.37 | 0.97 |
| Q8K182 | C140  | reversible | 0.93 | 0.77 | 0.68 | 0.85 | 0.83 | 0.84 |
| Q8K182 | C497  | reversible | 0.76 | 1.19 | 0.65 | NA   | 1.57 | NA   |
| Q8K1M6 | C367  | reversible | 1.04 | 1.36 | 1.21 | NA   | 1.32 | 0.98 |
| Q8K1M6 | C373  | reversible | 1.15 | 0.92 | 1.04 | 1.29 | 1.32 | 1.01 |

|        |      |            |      |      |      |      |      |      |
|--------|------|------------|------|------|------|------|------|------|
| Q8K1M6 | C452 | reversible | 1.09 | 0.92 | 1.23 | 1.09 | 1.13 | 1.24 |
| Q8K1R3 | C459 | reversible | 1.26 | 1.27 | 1.04 | 0.88 | NA   | 1.29 |
| Q8K224 | C489 | so2h       | 0.7  | 1.07 | NA   | 0.42 | 0.72 | NA   |
| Q8K2B3 | C189 | reversible | 0.75 | 0.9  | 0.89 | NA   | 1.42 | NA   |
| Q8K2B3 | C191 | reversible | 1.16 | 0.89 | 1.18 | NA   | 1.16 | 0.37 |
| Q8K2B3 | C238 | reversible | 1.15 | 1.05 | 0.89 | 0.87 | 1.21 | 1.1  |
| Q8K2B3 | C266 | reversible | 1.07 | 1.15 | 1.12 | 0.81 | 1.18 | 1.21 |
| Q8K2B3 | C357 | reversible | NA   | 0.62 | 1.07 | NA   | 1.45 | 0.44 |
| Q8K2B3 | C467 | reversible | 1.04 | 0.99 | 1.19 | 1.1  | NA   | 1.37 |
| Q8K2B3 | C475 | reversible | 1.18 | 0.93 | 0.96 | 0.83 | 0.94 | 1.08 |
| Q8K2B3 | C536 | reversible | 1.02 | 0.88 | 0.87 | 0.79 | 0.83 | 1.01 |
| Q8K2B3 | C654 | reversible | 1.08 | 0.94 | 0.77 | 0.93 | 0.86 | 1.11 |
| Q8K2C6 | C293 | reversible | 1.13 | 1.1  | 1.4  | 1.17 | 1.34 | NA   |
| Q8K3A6 | C211 | reversible | NA   | 1.14 | 0.86 | 1.54 | NA   | 1    |
| Q8K3J1 | C119 | reversible | 1.22 | 0.89 | 1.22 | 0.82 | 1.66 | 1.39 |
| Q8K3J1 | C123 | reversible | 0.93 | 1.06 | 1.2  | 0.98 | 0.83 | 1.4  |
| Q8K411 | C627 | reversible | NA   | NA   | 1.01 | 1.03 | 1.04 | 2.13 |
| Q8K4G1 | C599 | reversible | 1.05 | 1.37 | 1.15 | NA   | 1.47 | 1.1  |
| Q8QZR5 | C238 | reversible | 1.01 | 1.11 | 1    | 1.24 | 1.33 | NA   |
| Q8QZS1 | C335 | reversible | 1.03 | 0.71 | 0.91 | 0.96 | 1.37 | 1.09 |
| Q8QZS1 | C94  | reversible | 1    | 1.26 | 1.04 | 0.75 | 1    | 1.08 |
| Q8QZT1 | C116 | reversible | 1.1  | 1.24 | 1.14 | 0.8  | 1.19 | 1.14 |
| Q8QZT1 | C193 | reversible | 1.17 | 1.26 | 0.88 | 0.55 | 1.15 | 1.16 |
| Q8R086 | C300 | reversible | 1.02 | 1.2  | 1.05 | 0.96 | 1.03 | 1.58 |
| Q8R086 | C509 | reversible | 1.02 | 0.88 | 1.04 | NA   | 0.96 | 1.29 |
| Q8R0F8 | C115 | reversible | 0.76 | 1.1  | NA   | 1.06 | 0.93 | 1.65 |
| Q8R127 | C98  | reversible | 0.95 | 1.6  | 1.23 | 0.96 | 2.28 | 0.8  |
| Q8R4N0 | C181 | reversible | NA   | 0.86 | 1.24 | NA   | 0.84 | 1.47 |
| Q8R5C5 | C34  | reversible | 1.02 | 1.31 | 1.08 | 0.72 | 1.12 | 1.19 |
| Q8VBT0 | C106 | reversible | 1.06 | 1.13 | 1.2  | 1.45 | 1.08 | NA   |
| Q8VCG4 | C188 | reversible | 0.81 | NA   | 0.87 | 1.21 | NA   | 1.11 |
| Q8VCM7 | C34  | reversible | 1.08 | 1.38 | 1.47 | 1.34 | 1.38 | 0.91 |
| Q8VCT4 | C284 | reversible | 1.61 | 0.54 | 1.3  | 0.58 | 1.42 | 0.87 |
| Q8VDM4 | C448 | reversible | NA   | 1.67 | 1.22 | 1.16 | NA   | 1.17 |
| Q8VDN2 | C211 | reversible | 0.93 | 1.23 | 1.01 | 0.77 | 1    | 1.13 |
| Q8VDN2 | C249 | reversible | 1.02 | 1.09 | 1.37 | 0.99 | 1.02 | 1.02 |
| Q8VDN2 | C663 | reversible | 1.13 | NA   | 0.96 | 0.58 | 0.86 | 1.1  |
| Q8VDN2 | C705 | reversible | 1.28 | 1.16 | 1.09 | 0.91 | 0.92 | 0.98 |
| Q8VE95 | C100 | reversible | 1.02 | 1.4  | NA   | 1.09 | NA   | 0.91 |

|        |      |            |      |      |      |      |      |      |
|--------|------|------------|------|------|------|------|------|------|
| Q8VE96 | C254 | reversible | 0.8  | 1.14 | 1.04 | 1.06 | 0.87 | 0.89 |
| Q91VD9 | C367 | reversible | 0.92 | 0.99 | 0.82 | 0.92 | 0.93 | 0.98 |
| Q91VD9 | C554 | reversible | 1.01 | 1.18 | 1.25 | 0.95 | 1.3  | 1.21 |
| Q91VD9 | C75  | reversible | 1.03 | 0.98 | 1.05 | 0.8  | 1.06 | 1.27 |
| Q91VD9 | C78  | reversible | 1.21 | 1.02 | 1.18 | 0.75 | 1    | 1.09 |
| Q91VD9 | C92  | reversible | 1.1  | 1.02 | 1.12 | 1.02 | 1.08 | 1.47 |
| Q91VR2 | C103 | reversible | 1.09 | 1.11 | 1.25 | 0.9  | 1.13 | 1.43 |
| Q91WK1 | C114 | reversible | 1.01 | 0.78 | NA   | 0.89 | 0.83 | 1.41 |
| Q91X72 | C148 | reversible | 0.96 | 1.24 | 1.21 | 1.05 | 1.31 | 1.15 |
| Q91X72 | C153 | reversible | 0.87 | 1.17 | 1.49 | 1.21 | 1.31 | 0.93 |
| Q91X72 | C199 | reversible | 1.09 | 0.75 | 1.44 | 1.24 | 0.9  | 1.03 |
| Q91X72 | C230 | reversible | 1.01 | 1.25 | 1.84 | 1.21 | 1.49 | 1.2  |
| Q91X72 | C255 | reversible | 0.68 | 0.97 | 1.14 | 0.83 | 1.09 | 0.75 |
| Q91X72 | C364 | reversible | 0.99 | 0.97 | 1.61 | 1.3  | 1.19 | 1.01 |
| Q91X72 | C406 | reversible | 0.89 | 0.8  | 1.55 | 1.08 | 1.11 | 0.9  |
| Q91X72 | C458 | reversible | 0.92 | 0.81 | 1.77 | 1.26 | 1.14 | 1.14 |
| Q91YT0 | C125 | reversible | 0.9  | 0.97 | 0.99 | 0.77 | 1.08 | 1.1  |
| Q91YT0 | C142 | reversible | 1    | 1.15 | 1.1  | 0.86 | 1.33 | 1.32 |
| Q91YT0 | C238 | reversible | 0.94 | 1.05 | 1.39 | NA   | 1.73 | 1.35 |
| Q91YT0 | C255 | reversible | 1.05 | 0.89 | 1.29 | NA   | 1.17 | 1.1  |
| Q91YT0 | C425 | reversible | 0.98 | 0.65 | 0.97 | 1.2  | 1.09 | NA   |
| Q91YY4 | C141 | reversible | 0.99 | 1.07 | 0.91 | NA   | 1.07 | 1.27 |
| Q91ZA3 | C612 | reversible | 1.22 | NA   | 0.76 | 0.86 | NA   | 0.93 |
| Q91ZX7 | C808 | so2h       | 0.94 | 1.02 | NA   | NA   | 0.83 | 0.95 |
| Q91ZX7 | C815 | so2h       | NA   | 1.44 | 1.01 | 1.03 | NA   | 0.85 |
| Q921G7 | C117 | reversible | 1.29 | 0.87 | 1.01 | 0.91 | 0.92 | 1.22 |
| Q921G7 | C265 | reversible | 1.14 | 1.05 | 0.89 | 0.82 | 1.03 | 1.04 |
| Q921G7 | C386 | reversible | 0.99 | 1    | 1.08 | 1.1  | 1.24 | 0.96 |
| Q921G7 | C585 | reversible | 0.97 | 0.72 | 1.17 | 0.72 | 1.09 | 0.97 |
| Q921G7 | C588 | reversible | 0.92 | 0.92 | 1.02 | 0.81 | 0.91 | 0.59 |
| Q92111 | C156 | reversible | 0.92 | 1.24 | 1.54 | NA   | NA   | 1.18 |
| Q92111 | C177 | reversible | 0.94 | 1.13 | 1.56 | 1.68 | 1.01 | 1.28 |
| Q92111 | C180 | reversible | 1.11 | 1.07 | 1.49 | 1.79 | 1.23 | 1.02 |
| Q92111 | C246 | reversible | 0.95 | 1.22 | 1.34 | 1.25 | 1.06 | 1.14 |
| Q92111 | C260 | reversible | 0.79 | 1.14 | 1.2  | 1.14 | 1    | 0.97 |
| Q92111 | C28  | reversible | 0.83 | 1.03 | 1.39 | 1.29 | 1.2  | 1.16 |
| Q92111 | C350 | reversible | 0.86 | 1.23 | 1.22 | 1.18 | 1.3  | 1.08 |
| Q92111 | C363 | reversible | 0.86 | 1.47 | 1.84 | 1.36 | NA   | 1.36 |
| Q92111 | C373 | reversible | 0.87 | 0.79 | 1.15 | 0.69 | 0.96 | NA   |

|        |      |            |      |      |      |      |      |      |
|--------|------|------------|------|------|------|------|------|------|
| Q92111 | C386 | reversible | 0.93 | 1.14 | 1.21 | 1.13 | 1.19 | 0.95 |
| Q92111 | C472 | reversible | 0.85 | 1.32 | 1.64 | 1.07 | 1.17 | 1.43 |
| Q92111 | C506 | reversible | 1    | 1.02 | 1.26 | 1.37 | 0.94 | 1.14 |
| Q92111 | C583 | reversible | 0.93 | 1.18 | 1.33 | 1.14 | 0.89 | 1.31 |
| Q92111 | C597 | reversible | 1.08 | 1.3  | 1.54 | 1.21 | 1.27 | 1.3  |
| Q92111 | C633 | reversible | 1.04 | 0.9  | 1.91 | NA   | NA   | 0.87 |
| Q92111 | C638 | reversible | 0.9  | 1.03 | 1.25 | 1.54 | 1.13 | 1.11 |
| Q92111 | C67  | reversible | 0.84 | 1.14 | 1.42 | 1.21 | 1.3  | 1.5  |
| Q92111 | C692 | reversible | 0.83 | 1.01 | 1.55 | 1.46 | 0.81 | 0.97 |
| Q922B2 | C203 | reversible | 1.11 | 1.72 | 1.11 | 0.62 | 1.46 | 0.94 |
| Q922B2 | C267 | reversible | 0.92 | 1.45 | 1    | 1.11 | 1.26 | 1.56 |
| Q924M7 | C309 | reversible | 0.98 | NA   | 1.13 | 1.32 | 1.32 | 1.44 |
| Q924X2 | C448 | reversible | 1    | 1.26 | 1.07 | 0.92 | 1.16 | 1.21 |
| Q924X2 | C526 | reversible | 0.95 | 1.18 | 0.78 | 0.81 | NA   | NA   |
| Q924X2 | C86  | reversible | 1.37 | 1.01 | 0.64 | NA   | 1.01 | 0.91 |
| Q99J39 | C359 | reversible | 1.12 | 0.9  | 0.82 | 0.74 | 0.86 | 0.66 |
| Q99KI0 | C385 | reversible | 1.01 | 1.22 | 1.1  | 0.75 | 1.27 | 1.11 |
| Q99KI0 | C451 | reversible | 1.06 | 0.97 | 0.87 | 0.94 | 1.3  | 0.98 |
| Q99LB2 | C210 | reversible | 1.15 | 0.91 | 1.5  | 1.04 | 1.26 | 1.5  |
| Q99LC3 | C183 | reversible | 0.97 | 0.72 | 0.83 | 0.91 | 0.8  | 1.13 |
| Q99LC3 | C67  | reversible | 1.07 | 1.15 | 0.94 | 0.96 | 1.23 | 1.31 |
| Q99LC5 | C109 | reversible | 1.2  | 1.03 | 1.27 | 1.02 | 1.07 | 1.3  |
| Q99LC5 | C155 | reversible | 1.1  | 1.33 | 1.14 | 0.74 | 1.45 | 1.37 |
| Q99LC5 | C53  | reversible | 1.07 | 1.31 | 1.11 | 0.75 | 1.22 | 1.28 |
| Q99LC5 | C68  | reversible | 0.97 | 1.04 | 0.97 | 0.75 | 1.14 | 1.09 |
| Q99LX0 | C46  | reversible | 1.32 | 1.04 | 1.12 | 0.67 | 0.69 | NA   |
| Q99LX0 | C53  | reversible | 1.03 | 0.84 | 0.71 | 1.16 | NA   | NA   |
| Q99LY9 | C43  | reversible | 1.15 | 1.02 | 0.82 | 0.96 | 0.78 | 1.11 |
| Q99LY9 | C66  | reversible | 1.02 | 1.06 | 0.8  | 0.81 | 0.97 | 1.04 |
| Q99MN9 | C518 | reversible | NA   | NA   | 0.97 | 0.35 | 1.02 | 0.47 |
| Q99MR8 | C186 | reversible | NA   | 0.97 | 0.94 | NA   | 0.84 | 0.57 |
| Q99MR8 | C450 | reversible | 1    | 0.95 | 1.04 | 0.68 | 0.93 | NA   |
| Q99MR8 | C591 | reversible | 1.04 | 0.96 | 0.8  | NA   | 0.96 | NA   |
| Q99NB1 | C235 | reversible | 1.04 | 1.05 | 1.13 | 1.07 | 1.1  | 1.32 |
| Q99NB1 | C86  | reversible | 0.82 | 0.83 | 1.21 | 1.18 | NA   | NA   |
| Q9CPU4 | C56  | reversible | 1.12 | 1.26 | 1.16 | 1.2  | 0.96 | 1.67 |
| Q9CPV4 | C182 | reversible | 0.96 | 0.9  | 1.03 | 1.15 | 1.06 | 1.21 |
| Q9CPV4 | C206 | reversible | 0.97 | 0.9  | 1.14 | 1.36 | 1.48 | NA   |
| Q9CPY7 | C129 | reversible | 1.09 | 1.22 | 1.18 | 0.88 | 1.04 | 1.46 |



|        |      |            |      |      |      |      |      |      |
|--------|------|------------|------|------|------|------|------|------|
| Q9CPY7 | C335 | reversible | 0.87 | NA   | 1.21 | 0.9  | 0.99 | NA   |
| Q9CPY7 | C462 | reversible | 1.23 | 1.15 | 1.21 | 0.96 | 1.25 | 1.35 |
| Q9CQ62 | C86  | reversible | 0.88 | 1.41 | 1.55 | 1.1  | NA   | 1.02 |
| Q9CQN1 | C503 | reversible | 0.69 | NA   | 0.92 | 1.04 | 0.49 | 0.78 |
| Q9CR57 | C42  | reversible | 1.11 | 0.98 | 1.61 | NA   | 1.26 | NA   |
| Q9CR61 | C59  | reversible | 0.97 | 0.8  | 0.96 | 0.65 | NA   | NA   |
| Q9CR61 | C80  | reversible | 1.1  | 1.01 | 0.98 | 0.83 | 1.06 | 1.23 |
| Q9CR62 | C184 | reversible | 1    | 1.24 | 1.54 | 0.96 | 0.85 | 1.73 |
| Q9CRB9 | C183 | reversible | 0.96 | 0.9  | 0.83 | 0.67 | 0.86 | 1    |
| Q9CRB9 | C193 | reversible | 0.7  | 0.82 | 0.71 | 0.29 | 0.88 | NA   |
| Q9CRB9 | C204 | reversible | 0.88 | 0.53 | 1.22 | 0.83 | NA   | 1.09 |
| Q9CRB9 | C214 | reversible | 0.95 | 0.94 | 0.86 | 0.96 | NA   | 0.8  |
| Q9CY64 | C280 | reversible | 1.01 | 1.53 | 0.85 | NA   | 1.05 | 1.1  |
| Q9CZ13 | C268 | reversible | 0.97 | 1.2  | 1.13 | 0.96 | 1.33 | 1.41 |
| Q9CZ13 | C380 | reversible | 1.02 | 1.38 | 1.27 | 0.88 | 1.38 | 1.4  |
| Q9CZ13 | C410 | reversible | 0.93 | 1.22 | 0.96 | 0.96 | 1.47 | 1.28 |
| Q9CZ13 | C453 | reversible | 0.95 | 1.08 | 1.04 | 0.87 | 1.45 | 1.31 |
| Q9CZ13 | C69  | reversible | 0.89 | 0.71 | 1.12 | 1.03 | NA   | NA   |
| Q9CZB0 | C107 | reversible | 1.26 | 1.17 | 1.19 | 0.9  | 1.27 | 1.46 |
| Q9CZB0 | C70  | reversible | 1.15 | 1.23 | NA   | 1.05 | 0.9  | NA   |
| Q9CZU6 | C101 | reversible | 0.98 | 1.21 | 1.1  | 0.83 | 1.34 | 1.33 |
| Q9D051 | C169 | reversible | 0.69 | 0.84 | 0.83 | 1.04 | 2.45 | NA   |
| Q9D051 | C263 | reversible | 1.04 | 1.23 | 0.91 | 0.85 | 1.18 | 1.06 |
| Q9D0F9 | C101 | reversible | 1.07 | 1    | 1.3  | 1.24 | 1.31 | NA   |
| Q9D0F9 | C160 | reversible | 0.96 | 0.88 | 1.11 | 0.82 | NA   | 1.23 |
| Q9D0G0 | C196 | reversible | 1.01 | 0.93 | NA   | 1.36 | 0.88 | NA   |
| Q9D0K2 | C456 | reversible | 0.75 | 1.02 | 1.11 | 0.98 | 1.34 | NA   |
| Q9D172 | C174 | reversible | 1.13 | 1.1  | 0.65 | 1.1  | 0.66 | 1.01 |
| Q9D1Q6 | C189 | reversible | 0.91 | 0.98 | 1.05 | 1.09 | 1.02 | 1.26 |
| Q9D1Q6 | C301 | reversible | 0.69 | 0.82 | 1.08 | 0.86 | 0.98 | 1.05 |
| Q9D1Q6 | C318 | reversible | 0.99 | 1.14 | NA   | 1.04 | 1.2  | 1.34 |
| Q9D404 | C86  | reversible | 1.1  | 0.83 | 0.94 | 1.11 | 0.97 | NA   |
| Q9D5T0 | C137 | reversible | 0.88 | 1.01 | 1.66 | 1.2  | NA   | NA   |
| Q9D5T0 | C310 | reversible | 1.05 | 1.07 | 1.05 | 0.95 | NA   | 1.88 |
| Q9D6R2 | C222 | reversible | 0.88 | 0.84 | 0.87 | 0.85 | 0.67 | 1.05 |
| Q9D6R2 | C331 | reversible | 1.08 | 1    | 0.99 | 0.82 | 0.86 | 1.28 |
| Q9D6R2 | C359 | reversible | 0.89 | 0.96 | 1.1  | 0.71 | 0.78 | 0.79 |
| Q9D7B6 | C215 | reversible | 1.22 | 1.38 | 1.04 | 0.9  | 1.29 | 1.27 |
| Q9D7B6 | C281 | reversible | NA   | NA   | 0.78 | 1.03 | 1.12 | 1.28 |

|        |      |            |      |      |      |      |      |      |
|--------|------|------------|------|------|------|------|------|------|
| Q9D7N3 | C227 | reversible | NA   | 1.23 | 0.92 | 0.85 | NA   | 0.74 |
| Q9D7N9 | C148 | reversible | 1.18 | 1.18 | 1.82 | 0.9  | 1.38 | NA   |
| Q9D8B4 | C18  | reversible | 0.88 | 1.03 | 0.9  | 0.78 | 1.11 | 1.05 |
| Q9D8B4 | C95  | reversible | 0.83 | 0.96 | 0.91 | 0.82 | 1.01 | 1.25 |
| Q9DB20 | C141 | reversible | 1.18 | 1.13 | 1.27 | 0.66 | 1.21 | 1.46 |
| Q9DB77 | C192 | reversible | 1.1  | 1.6  | 1.01 | 0.88 | 1.28 | 1.26 |
| Q9DBD0 | C260 | reversible | 0.83 | 1.46 | NA   | 1.14 | NA   | 0.75 |
| Q9DBD0 | C58  | reversible | 1    | 1.16 | 1.91 | 1.29 | 1.56 | NA   |
| Q9DBD0 | C67  | reversible | 1.1  | 1.22 | 1.19 | 1.07 | NA   | NA   |
| Q9DBL1 | C261 | reversible | 0.98 | NA   | 0.94 | NA   | 1.15 | 1.37 |
| Q9DC69 | C86  | reversible | 0.85 | 1.05 | 1.03 | 0.98 | 1.58 | 0.95 |
| Q9DCJ5 | C110 | reversible | 0.99 | 0.91 | 0.83 | 0.68 | 1    | 1.12 |
| Q9DCJ5 | C36  | reversible | 1    | 0.98 | 1.04 | 0.8  | 1.07 | 1.28 |
| Q9DCJ5 | C66  | reversible | 0.99 | 1.44 | 1.02 | 0.75 | 1.62 | 1.56 |
| Q9DCL9 | C281 | reversible | 1.04 | 1.36 | 1.22 | NA   | 1.35 | 0.94 |
| Q9DCS9 | C125 | reversible | 0.99 | 1.09 | 1.15 | 0.83 | 1.09 | 1.12 |
| Q9DCS9 | C77  | reversible | 1.12 | 1.13 | 0.9  | 0.96 | 1.17 | 1.27 |
| Q9DCW4 | C66  | reversible | 1    | 1.09 | 1.17 | 0.79 | 1.25 | 1.1  |
| Q9DCW4 | C71  | reversible | 1.07 | 0.95 | 1.47 | 0.75 | 1.07 | 1.13 |
| Q9DCX2 | C101 | reversible | 0.73 | 2.04 | 1.64 | 0.81 | 0.82 | 1.64 |
| Q9DCZ1 | C186 | reversible | 1.07 | NA   | 1.09 | 1.09 | 1.25 | 1.21 |
| Q9EQ20 | C368 | reversible | NA   | 1.28 | 1.25 | 0.88 | NA   | 1.38 |
| Q9EQ20 | C86  | reversible | 1.13 | 0.88 | 0.64 | 1.07 | 0.68 | 1.05 |
| Q9EQH3 | C156 | reversible | 1.37 | NA   | NA   | 1    | 1.21 | 1.33 |
| Q9ESB3 | C103 | reversible | 0.83 | 1.39 | 1.64 | 1.39 | NA   | NA   |
| Q9ESB3 | C216 | reversible | 0.97 | 1.55 | 1.41 | 1.53 | 1.14 | 1.39 |
| Q9ESB3 | C89  | reversible | 0.96 | 1.45 | 1.31 | 1.68 | NA   | NA   |
| Q9ESW4 | C72  | reversible | 0.88 | 1.52 | 1.3  | 1.15 | 1    | 0.94 |
| Q9JHI5 | C134 | reversible | 0.99 | 0.97 | 1.03 | 1.2  | 1.07 | 0.77 |
| Q9JHI5 | C252 | reversible | 1    | 0.81 | 1.02 | 0.77 | 0.86 | 0.98 |
| Q9JHI5 | C348 | reversible | 1.09 | 1.04 | 0.91 | 0.51 | 1.22 | 1.03 |
| Q9JHW2 | C44  | reversible | 0.78 | 0.88 | NA   | 1.3  | 0.93 | 1.05 |
| Q9JHW2 | C97  | reversible | 0.9  | 0.79 | 1.04 | 1.25 | NA   | NA   |
| Q9JI91 | C187 | reversible | 0.68 | 1.91 | 1.38 | 1.38 | 2.14 | 0.97 |
| Q9QUI0 | C16  | reversible | 1.13 | 1.26 | 1.17 | 1.57 | 1.01 | 1.31 |
| Q9QUR6 | C57  | reversible | 1.21 | 1.37 | 1.34 | 1.55 | 1.4  | 1.18 |
| Q9QWK4 | C194 | reversible | 1.08 | 1.19 | 0.84 | 1.03 | 1.92 | 1.18 |
| Q9QXX4 | C504 | reversible | 0.96 | 1.04 | 1.3  | 1.22 | NA   | 1.01 |
| Q9QY15 | C320 | reversible | 0.97 | 1.35 | NA   | NA   | 1.35 | 1.06 |

|        |       |            |      |      |      |      |      |      |
|--------|-------|------------|------|------|------|------|------|------|
| Q9QYG0 | C78   | reversible | 0.76 | 1.35 | 1.1  | 0.69 | NA   | NA   |
| Q9QZZ6 | C50   | reversible | 1.05 | 0.63 | 1    | 0.7  | NA   | 0.79 |
| Q9R069 | C118  | reversible | 0.96 | 1.17 | 0.89 | 0.78 | 1.11 | 0.72 |
| Q9R069 | C284  | reversible | 0.97 | NA   | 1.22 | 0.81 | NA   | 0.74 |
| Q9R069 | C516  | reversible | 0.95 | 1    | 1.23 | 0.74 | 0.8  | 1    |
| Q9R0H0 | C199  | reversible | 1.18 | 0.82 | 0.86 | 0.63 | NA   | 0.62 |
| Q9WTP6 | C42   | reversible | 0.98 | 0.46 | 1.08 | 0.87 | NA   | NA   |
| Q9WTP6 | C92   | reversible | 0.99 | 1.06 | NA   | 0.57 | NA   | 0.73 |
| Q9WUB3 | C446  | reversible | 0.94 | 1.48 | 1.1  | 1.03 | 1.52 | 1.22 |
| Q9WUB3 | C496  | reversible | 1.57 | 1.14 | 1.16 | 1.2  | 1.4  | 1.27 |
| Q9WUM5 | C172  | reversible | 0.99 | 0.97 | 1.07 | 1.16 | 1.92 | 1    |
| Q9WUM5 | C181  | reversible | 0.82 | 1.03 | 0.93 | 1.61 | 0.87 | 1.01 |
| Q9WUM5 | C60   | reversible | 0.96 | 1    | 1.11 | 1.32 | 1.27 | 1.04 |
| Q9WUR2 | C279  | reversible | 1.07 | NA   | 1.29 | 1.1  | 0.66 | NA   |
| Q9WVH9 | C46   | reversible | 0.97 | 0.85 | NA   | NA   | 0.86 | 0.77 |
| Q9Z0P5 | C275  | reversible | 0.98 | 0.87 | 1.23 | NA   | 1.17 | NA   |
| Q9Z0P5 | C67   | reversible | 0.99 | 0.95 | 1.09 | 1.55 | 1.3  | NA   |
| Q9Z1Q2 | C7    | reversible | 0.98 | NA   | 1.48 | 1.35 | 1.23 | NA   |
| Q9Z2C5 | C482  | reversible | 1.22 | 1.15 | NA   | 1.46 | 0.88 | NA   |
| Q9Z2I9 | C152  | reversible | 1.01 | 1.31 | 0.87 | 0.8  | 0.9  | 1.19 |
| Q9Z2I9 | C158  | reversible | 1.11 | 1.14 | 0.85 | 0.81 | 0.9  | 1.2  |
| Q9Z2I9 | C270  | reversible | 1.41 | 0.92 | 0.9  | NA   | NA   | 0.89 |
| Q9Z2I9 | C430  | reversible | 1.04 | 1.02 | 0.77 | 0.68 | 0.85 | 1    |
| Q9Z2Z6 | C155  | reversible | 1    | 1.18 | 0.51 | NA   | 1.15 | NA   |
| A2A8L5 | C1527 | so3h       | 0.77 | NA   | NA   | 0.97 | NA   | 1.56 |
| A2A8L5 | C1539 | so2h       | 0.77 | NA   | NA   | 0.97 | NA   | 1.56 |
| A2AUC9 | C147  | reversible | 1.04 | NA   | 1.19 | 1.22 | NA   | NA   |
| B2RXS4 | C617  | reversible | 0.92 | NA   | 0.95 | 0.8  | NA   | NA   |
| E9PV24 | C438  | reversible | 1.06 | 0.94 | NA   | NA   | NA   | 0.72 |
| O08529 | C374  | reversible | 1.18 | 1.39 | 1.11 | NA   | NA   | NA   |
| O35600 | C1487 | so2h       | 0.81 | NA   | 1.24 | NA   | NA   | 1.23 |
| O35600 | C1489 | so2h       | 0.81 | NA   | 1.24 | NA   | NA   | 1.23 |
| O55143 | C344  | reversible | NA   | NA   | 0.73 | 0.93 | 0.83 | NA   |
| O55143 | C498  | reversible | NA   | 1.22 | 0.6  | 1    | NA   | NA   |
| O70370 | C178  | reversible | NA   | 1.6  | 0.79 | 1.05 | NA   | NA   |
| O70468 | C1260 | reversible | 0.85 | NA   | NA   | 0.78 | NA   | 0.99 |
| O88737 | C1775 | so2h       | 1.17 | NA   | 0.76 | 1.16 | NA   | NA   |
| O88792 | C49   | reversible | 1.03 | NA   | 1.29 | 1.29 | NA   | NA   |
| O89103 | C297  | reversible | 1    | 0.85 | NA   | 0.45 | NA   | NA   |

|        |       |            |      |      |      |      |      |      |
|--------|-------|------------|------|------|------|------|------|------|
| P01029 | C667  | reversible | 2.32 | 1.08 | NA   | 3.38 | NA   | NA   |
| P01872 | C304  | reversible | 1.27 | NA   | 1.1  | 0.85 | NA   | NA   |
| P01872 | C352  | reversible | 0.88 | NA   | 1.22 | NA   | NA   | 0.89 |
| P02463 | C1493 | reversible | 1.1  | 0.94 | 1.33 | NA   | NA   | NA   |
| P02468 | C475  | reversible | NA   | NA   | 1.46 | 0.63 | 0.98 | NA   |
| P06801 | C47   | reversible | 1.09 | 1.01 | 1.26 | NA   | NA   | NA   |
| P06909 | C205  | so3h       | NA   | NA   | NA   | 0.69 | 0.94 | 0.78 |
| P06909 | C210  | so2h       | NA   | NA   | NA   | 1.07 | 0.94 | 0.78 |
| P07724 | C384  | reversible | NA   | 0.96 | NA   | 1.09 | NA   | 1.45 |
| P07724 | C385  | reversible | NA   | 0.96 | NA   | 1.09 | NA   | 1.45 |
| P08607 | C245  | reversible | 1.42 | 1.54 | NA   | 2.23 | NA   | NA   |
| P09055 | C618  | reversible | NA   | NA   | 1.54 | 0.43 | NA   | 1.89 |
| P09411 | C50   | reversible | NA   | 1.31 | NA   | 0.95 | NA   | 1.37 |
| P10605 | C319  | reversible | 0.8  | 0.87 | 0.99 | NA   | NA   | NA   |
| P10751 | C9    | reversible | 1.46 | 0.86 | NA   | 1.12 | NA   | NA   |
| P16015 | C187  | reversible | 2.27 | NA   | 1.65 | 1.09 | NA   | NA   |
| P19221 | C236  | reversible | 1.06 | NA   | 1.38 | 1.18 | NA   | NA   |
| P19221 | C547  | reversible | NA   | 0.81 | 1.02 | 1.31 | NA   | NA   |
| P20918 | C324  | reversible | 1.37 | 1.6  | 1    | NA   | NA   | NA   |
| P20918 | C609  | reversible | 0.99 | 1.08 | 0.72 | NA   | NA   | NA   |
| P20918 | C625  | reversible | 0.99 | 1.08 | 0.72 | NA   | NA   | NA   |
| P21981 | C553  | reversible | NA   | NA   | 0.78 | 1.02 | NA   | 0.71 |
| P22315 | C193  | reversible | NA   | 1.55 | NA   | 0.75 | NA   | 1.1  |
| P26041 | C117  | reversible | 1.31 | 1.79 | NA   | NA   | NA   | 1.38 |
| P28271 | C392  | reversible | 1.12 | 1.3  | NA   | NA   | NA   | 1.6  |
| P28474 | C97   | reversible | 1.44 | 1.01 | NA   | 0.91 | NA   | NA   |
| P34914 | C312  | reversible | NA   | 0.74 | 1.18 | NA   | 0.67 | NA   |
| P34914 | C521  | reversible | 1.04 | NA   | 0.83 | 0.91 | NA   | NA   |
| P35700 | C71   | reversible | 0.89 | 0.73 | NA   | 1.38 | NA   | NA   |
| P35922 | C141  | so2h       | NA   | NA   | 0.73 | 0.99 | 1.03 | NA   |
| P41183 | C636  | reversible | 0.89 | NA   | 0.95 | NA   | NA   | 1.37 |
| P42125 | C87   | reversible | 0.87 | NA   | 1.02 | NA   | 0.78 | NA   |
| P45376 | C299  | reversible | NA   | NA   | 0.64 | 1.63 | 0.97 | NA   |
| P45377 | C83   | so3h       | NA   | 0.94 | NA   | NA   | 1.24 | 0.84 |
| P50396 | C202  | reversible | 1.21 | 1.6  | 1.19 | NA   | NA   | NA   |
| P50462 | C168  | reversible | 1.17 | NA   | 0.7  | 1.22 | NA   | NA   |
| P50462 | C25   | reversible | NA   | NA   | 1.18 | 0.82 | NA   | 1.26 |
| P50544 | C423  | reversible | NA   | 0.96 | 1.25 | 1.19 | NA   | NA   |
| P51881 | C257  | reversible | 1.93 | 1.09 | NA   | 0.69 | NA   | NA   |

|        |       |            |      |      |      |      |      |      |
|--------|-------|------------|------|------|------|------|------|------|
| P52503 | C104  | reversible | 0.87 | NA   | 1.34 | 1.12 | NA   | NA   |
| P54797 | C135  | reversible | 0.99 | NA   | 1.49 | NA   | 1.27 | NA   |
| P56391 | C65   | reversible | 1.12 | NA   | 1.9  | 0.85 | NA   | NA   |
| P62281 | C60   | reversible | 1.13 | NA   | 1.56 | 1.18 | NA   | NA   |
| P62827 | C120  | reversible | NA   | 2.26 | NA   | 1.85 | NA   | 1.61 |
| P62880 | C148  | reversible | 0.86 | 1.21 | NA   | 0.82 | NA   | NA   |
| P63011 | C184  | reversible | 0.51 | NA   | 1.05 | 1.26 | NA   | NA   |
| P67778 | C69   | reversible | 1.19 | 1.1  | 1.28 | NA   | NA   | NA   |
| P97351 | C139  | reversible | NA   | 1.89 | 1.78 | NA   | 1.16 | NA   |
| Q00724 | C192  | reversible | 1.43 | NA   | 1.63 | 1.18 | NA   | NA   |
| Q03265 | C294  | reversible | 0.99 | 0.9  | NA   | NA   | 0.81 | NA   |
| Q04998 | C38   | reversible | NA   | 1.07 | NA   | NA   | 1.07 | 1.21 |
| Q05920 | C739  | reversible | NA   | 1.22 | 0.91 | 1.08 | NA   | NA   |
| Q07113 | C1509 | reversible | 0.92 | NA   | NA   | 0.95 | 0.83 | NA   |
| Q07113 | C2241 | reversible | 0.92 | 1.19 | NA   | 1.63 | NA   | NA   |
| Q07968 | C379  | reversible | NA   | 1.8  | 1.4  | NA   | 1.76 | NA   |
| Q08857 | C313  | reversible | NA   | 1.34 | NA   | 0.87 | NA   | 1.09 |
| Q2TL60 | C331  | reversible | NA   | NA   | 1.21 | 1.1  | NA   | 1.34 |
| Q2VLH6 | C591  | reversible | 1.35 | 1.09 | 0.91 | NA   | NA   | NA   |
| Q3THS6 | C34   | reversible | 1.82 | NA   | 1.16 | NA   | NA   | 1.37 |
| Q3TMH2 | C143  | reversible | 1.01 | 2.41 | 1.28 | NA   | NA   | NA   |
| Q3TXS7 | C898  | reversible | NA   | NA   | 1.31 | 1.08 | NA   | 1.17 |
| Q3UX10 | C323  | reversible | 0.59 | NA   | 0.99 | NA   | 1.17 | NA   |
| Q3V384 | C72   | reversible | NA   | 1.24 | 1.15 | NA   | NA   | 1.12 |
| Q60675 | C3115 | reversible | NA   | 1.15 | NA   | NA   | 1.15 | 0.76 |
| Q60930 | C104  | reversible | 1.05 | 1.18 | NA   | NA   | NA   | 1.21 |
| Q61147 | C173  | reversible | 0.74 | NA   | NA   | NA   | 1.23 | 1.21 |
| Q61543 | C114  | reversible | 0.68 | 1.11 | NA   | 0.72 | NA   | NA   |
| Q61554 | C1182 | reversible | 1.46 | NA   | 1.56 | NA   | NA   | 1.85 |
| Q61554 | C2489 | reversible | 0.89 | 1.46 | 1.34 | NA   | NA   | NA   |
| Q61738 | C103  | reversible | NA   | 0.46 | 0.63 | 0.85 | NA   | NA   |
| Q61838 | C1339 | reversible | 1.01 | NA   | 1.38 | NA   | NA   | 0.62 |
| Q61838 | C249  | reversible | 1.5  | 0.93 | NA   | 1.02 | NA   | NA   |
| Q61838 | C689  | reversible | NA   | 0.63 | 1.72 | NA   | 1.21 | NA   |
| Q61838 | C859  | reversible | 1.23 | 1.25 | 1.2  | NA   | NA   | NA   |
| Q61838 | C861  | reversible | 1.23 | 1.2  | NA   | NA   | NA   | 1.11 |
| Q62188 | C248  | reversible | 0.73 | NA   | 2.1  | 1.57 | NA   | NA   |
| Q64112 | C63   | so2h       | NA   | 1.39 | 0.95 | NA   | NA   | 0.88 |
| Q6GYP7 | C1152 | reversible | NA   | 0.63 | 0.73 | 0.98 | NA   | NA   |

|        |       |            |      |      |      |      |      |      |
|--------|-------|------------|------|------|------|------|------|------|
| Q6PIE5 | C372  | reversible | 1.16 | NA   | 0.85 | 0.83 | NA   | NA   |
| Q6PIE5 | C426  | reversible | 1    | 0.75 | NA   | 0.88 | NA   | NA   |
| Q6X893 | C97   | reversible | 0.72 | NA   | 1.28 | NA   | 0.8  | NA   |
| Q6ZVV3 | C105  | reversible | 1.21 | NA   | 1.74 | 1.35 | NA   | NA   |
| Q80V23 | C162  | reversible | 1.38 | 1.12 | 1.25 | NA   | NA   | NA   |
| Q80YQ8 | C4    | reversible | NA   | 1.12 | NA   | NA   | 1.27 | 1.21 |
| Q8BFP9 | C238  | reversible | 1.04 | NA   | NA   | 0.95 | NA   | 0.82 |
| Q8BGK2 | C23   | reversible | NA   | 1.31 | 0.77 | 0.92 | NA   | NA   |
| Q8BH35 | C502  | reversible | 0.83 | NA   | 0.76 | 1.03 | NA   | NA   |
| Q8BH86 | C54   | reversible | 1.24 | NA   | 0.74 | 0.91 | NA   | NA   |
| Q8BJU9 | C267  | reversible | NA   | 1.07 | 1.09 | NA   | NA   | 0.8  |
| Q8BKY8 | C12   | so2h       | 1.15 | NA   | 0.99 | NA   | 0.81 | NA   |
| Q8C7H1 | C97   | reversible | NA   | 0.99 | 1.03 | 1.28 | NA   | NA   |
| Q8C7X2 | C339  | reversible | 0.94 | NA   | NA   | 1.37 | NA   | 0.72 |
| Q8CC88 | C415  | reversible | NA   | NA   | 0.87 | 0.88 | NA   | 0.81 |
| Q8CFX1 | C390  | reversible | NA   | 0.79 | 1.01 | NA   | 1.25 | NA   |
| Q8CFX1 | C621  | reversible | NA   | 0.79 | 0.65 | 0.77 | NA   | NA   |
| Q8CGK3 | C509  | reversible | NA   | 1.2  | 0.71 | NA   | 0.97 | NA   |
| Q8JZQ2 | C312  | reversible | 1.01 | 0.86 | 0.72 | NA   | NA   | NA   |
| Q8K182 | C194  | reversible | 0.82 | 0.74 | NA   | NA   | 0.74 | NA   |
| Q8K2B3 | C311  | reversible | 1.86 | 0.95 | 0.59 | NA   | NA   | NA   |
| Q8K2C6 | C181  | reversible | NA   | NA   | 1.25 | 0.86 | 0.96 | NA   |
| Q8K3A6 | C209  | reversible | NA   | NA   | 1.01 | 0.72 | NA   | 0.77 |
| Q8K4G1 | C417  | reversible | NA   | 1.05 | 1.33 | 0.9  | NA   | NA   |
| Q8QZS1 | C44   | reversible | NA   | 1.4  | 1.14 | 0.87 | NA   | NA   |
| Q8QZT1 | C123  | reversible | NA   | NA   | 1.21 | 0.88 | NA   | 0.99 |
| Q8R2Q0 | C420  | reversible | 0.92 | NA   | 1.22 | NA   | 1.23 | NA   |
| Q8R3F9 | C577  | reversible | 1.02 | NA   | 0.79 | NA   | NA   | 1.1  |
| Q8R4N0 | C72   | reversible | 1.11 | 0.73 | NA   | NA   | NA   | 1.27 |
| Q8VBT1 | C275  | reversible | 0.68 | 1.19 | NA   | NA   | 1.1  | NA   |
| Q8VDQ1 | C187  | reversible | 1.01 | NA   | 0.79 | 0.98 | NA   | NA   |
| Q8VEM8 | C131  | reversible | 0.72 | 1    | NA   | 1.35 | NA   | NA   |
| Q91W90 | C366  | reversible | NA   | 1.33 | 1.71 | NA   | NA   | 1.21 |
| Q91YK8 | C153  | reversible | NA   | NA   | 1.28 | 0.97 | 0.99 | NA   |
| Q91ZJ5 | C123  | reversible | 1.05 | 1.39 | 1.4  | NA   | NA   | NA   |
| Q91ZX7 | C3696 | reversible | NA   | NA   | 1.86 | 1.25 | 1.33 | NA   |
| Q922B1 | C197  | reversible | NA   | 1.81 | NA   | 0.72 | NA   | 0.71 |
| Q924D0 | C130  | reversible | 0.85 | NA   | 1.2  | NA   | NA   | 0.7  |
| Q924X2 | C155  | reversible | 1.22 | NA   | 1.19 | 1.03 | NA   | NA   |

|        |       |            |      |      |      |      |      |      |
|--------|-------|------------|------|------|------|------|------|------|
| Q99J39 | C214  | reversible | 1.07 | 0.7  | 0.87 | NA   | NA   | NA   |
| Q99J39 | C67   | reversible | 1    | 0.52 | 0.64 | NA   | NA   | NA   |
| Q99JY3 | C61   | reversible | NA   | NA   | 1.2  | 0.89 | NA   | 1.47 |
| Q99M04 | C210  | reversible | 0.67 | 1.23 | 1.51 | NA   | NA   | NA   |
| Q99M87 | C292  | reversible | 1.1  | 1.26 | NA   | 0.95 | NA   | NA   |
| Q99MN9 | C367  | reversible | 1.12 | 2.39 | NA   | 0.76 | NA   | NA   |
| Q99MN9 | C519  | reversible | 0.83 | NA   | 1.35 | 0.49 | NA   | NA   |
| Q99P30 | C223  | reversible | 1.25 | NA   | 1.46 | 0.84 | NA   | NA   |
| Q9CPU0 | C139  | reversible | 1.01 | NA   | 1.59 | 1.05 | NA   | NA   |
| Q9CPY7 | C376  | reversible | 1.05 | 1.74 | NA   | 1.09 | NA   | NA   |
| Q9CQJ8 | C42   | reversible | NA   | NA   | NA   | 1.66 | 1.42 | 1.37 |
| Q9CZ30 | C75   | reversible | NA   | 1.22 | 3.02 | 1.25 | NA   | NA   |
| Q9D0S9 | C75   | reversible | 1.15 | NA   | 1.35 | NA   | NA   | 1.1  |
| Q9D5T0 | C359  | reversible | 0.95 | NA   | 1.28 | 1.08 | NA   | NA   |
| Q9D6R2 | C351  | reversible | NA   | 1.94 | 0.58 | NA   | NA   | 1.25 |
| Q9D7B6 | C249  | reversible | 0.84 | NA   | 0.51 | NA   | NA   | 0.92 |
| Q9D7J4 | C28   | reversible | 1.13 | 0.74 | NA   | 0.7  | NA   | NA   |
| Q9D7N9 | C139  | reversible | 0.98 | NA   | 1.87 | 1.01 | NA   | NA   |
| Q9D8N0 | C194  | reversible | NA   | 1.61 | NA   | 1.49 | NA   | 1.56 |
| Q9DBL1 | C234  | reversible | 1.8  | NA   | NA   | 0.98 | NA   | 1.7  |
| Q9DC70 | C194  | reversible | 0.74 | 0.62 | NA   | NA   | NA   | 1.05 |
| Q9DCM0 | C219  | reversible | 0.82 | 1.2  | 1.24 | NA   | NA   | NA   |
| Q9DCM0 | C34   | reversible | 1    | 0.94 | NA   | 1.2  | NA   | NA   |
| Q9ET30 | C64   | reversible | 1.35 | NA   | 2.05 | 1.37 | NA   | NA   |
| Q9JI91 | C48   | reversible | 0.9  | NA   | NA   | 1.48 | 2.4  | NA   |
| Q9QXX4 | C566  | reversible | 1.22 | NA   | 0.95 | 1.11 | NA   | NA   |
| Q9QYJ0 | C146  | reversible | NA   | 1.34 | NA   | 0.98 | 1.34 | NA   |
| Q9QZ88 | C41   | reversible | 1    | NA   | 1.1  | 1.28 | NA   | NA   |
| Q9R069 | C47   | reversible | NA   | 1.13 | 1.32 | 0.82 | NA   | NA   |
| Q9R0P9 | C220  | reversible | 0.98 | 2.58 | NA   | 1.4  | NA   | NA   |
| Q9Z0X1 | C316  | reversible | 0.66 | NA   | NA   | NA   | 0.83 | 1.09 |
| Q9Z2W0 | C445  | reversible | NA   | 2.25 | NA   | 1.01 | 1.19 | NA   |
| Q9Z2Z6 | C58   | reversible | 0.76 | 0.67 | NA   | 1.11 | NA   | NA   |
| P08122 | C1653 | reversible | 1.22 | 1.25 | 1.27 | 1.3  | 1.34 | 1.39 |
| P08122 | C1660 | reversible | 2.23 | 2.01 | 1.79 | 1.57 | 1.24 | 0.79 |
| P13542 | C950  | reversible | 0.87 | 0.84 | 0.82 | 0.79 | 0.75 | 0.7  |
| P16125 | C164  | reversible | 1.31 | 1.27 | 1.24 | 1.2  | 1.14 | 1.07 |
| Q61292 | C50   | reversible | 0.58 | 0.62 | 0.66 | 0.71 | 0.77 | 0.86 |
| Q61835 | C61   | so3h       | 0.73 | 0.74 | 0.75 | 0.76 | 0.77 | 0.79 |

|        |       |            |      |      |      |      |      |      |
|--------|-------|------------|------|------|------|------|------|------|
| Q8C547 | C870  | so2h       | 5.28 | 4.48 | 3.67 | 2.87 | 1.67 | 0.06 |
| Q9JKS4 | C594  | reversible | 0.64 | 0.67 | 0.71 | 0.75 | 0.81 | 0.89 |
| A2ARA8 | C933  | so2h       | 1.17 | 1.02 | 2.58 | 3.54 | 4.98 | 6.99 |
| E9Q394 | C1380 | so3h       | 0.79 | 0.57 | 0.54 | 0.44 | 0.29 | 0.1  |
| O54734 | C130  | reversible | 0.97 | 1.28 | 2.6  | 3.56 | 5.01 | 6.99 |
| O88516 | C415  | reversible | 1.06 | 1.06 | 2.55 | 3.52 | 4.97 | 6.99 |
| P16332 | C469  | reversible | 1.02 | 0.69 | 0.67 | 0.54 | 0.35 | 0.1  |
| P17710 | C214  | reversible | 1.1  | 1.33 | 2.66 | 3.61 | 5.03 | 6.99 |
| P20918 | C73   | reversible | 1.55 | 1.51 | 2.91 | 3.8  | 5.13 | 6.99 |
| P21956 | C308  | reversible | 0.83 | 1.6  | 2.66 | 3.62 | 5.06 | 6.99 |
| Q06806 | C325  | reversible | 0.96 | 1.19 | 2.56 | 3.53 | 4.99 | 6.99 |
| Q3UHN9 | C6    | so2h       | 0.79 | 0.83 | 0.63 | 0.52 | 0.35 | 0.1  |
| Q60864 | C62   | reversible | 0.91 | 0.8  | 0.67 | 0.54 | 0.36 | 0.1  |
| Q61129 | C62   | so3h       | 1.38 | 0.84 | 2.6  | 3.55 | 4.97 | 6.99 |
| Q61129 | C64   | so3h       | 1.38 | 0.84 | 2.6  | 3.55 | 4.97 | 6.99 |
| Q6TL19 | C605  | reversible | 0.94 | 0.87 | 0.7  | 0.57 | 0.37 | 0.1  |
| Q6TL19 | C608  | reversible | 0.94 | 0.87 | 0.7  | 0.57 | 0.37 | 0.1  |
| Q80V03 | C321  | so3h       | 1.01 | 0.86 | 0.73 | 0.59 | 0.38 | 0.1  |
| Q8BFZ8 | C12   | so3h       | 1.36 | 0.63 | 0.78 | 0.62 | 0.38 | 0.1  |
| Q8BGA8 | C10   | so3h       | 1.06 | 1.01 | 2.53 | 3.51 | 4.96 | 6.99 |
| Q8VCM7 | C48   | reversible | 1.13 | 0.9  | 2.52 | 3.49 | 4.95 | 6.99 |
| Q9CR55 | C19   | so3h       | 1.04 | 1.03 | 2.53 | 3.5  | 4.96 | 6.99 |
| Q9CZ49 | C559  | so3h       | 0.92 | 0.94 | 0.72 | 0.59 | 0.39 | 0.1  |
| Q9DCJ5 | C78   | reversible | 1.38 | 0.57 | 0.77 | 0.61 | 0.37 | 0.1  |
| A2ARA8 | C923  | so2h       | 1.17 | 1.02 | 3.56 | 6.99 | 6.99 | 6.99 |
| O35660 | C87   | reversible | 0.99 | 1    | 0.62 | 0.1  | 0.1  | 0.1  |
| O70325 | C16   | so2h       | 1.1  | 0.88 | 0.62 | 0.1  | 0.1  | 0.1  |
| P06909 | C906  | reversible | 1.22 | 0.99 | 3.57 | 6.99 | 6.99 | 6.99 |
| P62897 | C18   | so2h       | 1.06 | 0.72 | 0.57 | 0.1  | 0.1  | 0.1  |
| P63038 | C442  | reversible | 1.67 | 1.12 | 3.75 | 6.99 | 6.99 | 6.99 |
| Q5SUV1 | C56   | reversible | 1.08 | 0.96 | 3.52 | 6.99 | 6.99 | 6.99 |
| Q60766 | C373  | so3h       | 0.41 | 0.59 | 0.33 | 0.1  | 0.1  | 0.1  |
| Q61129 | C57   | so2h       | 1.38 | 0.84 | 3.58 | 6.99 | 6.99 | 6.99 |
| Q61316 | C417  | reversible | 1.06 | 2.37 | 3.9  | 6.99 | 6.99 | 6.99 |
| Q61702 | C537  | reversible | 0.84 | 0.76 | 0.51 | 0.1  | 0.1  | 0.1  |
| Q6PDM2 | C148  | reversible | 1.22 | 1.03 | 3.58 | 6.99 | 6.99 | 6.99 |
| Q80W21 | C87   | reversible | 1.11 | 1    | 3.54 | 6.99 | 6.99 | 6.99 |
| Q8BGA8 | C20   | so3h       | 1.06 | 1.01 | 3.53 | 6.99 | 6.99 | 6.99 |
| Q8BH59 | C505  | reversible | 1.04 | 0.88 | 0.61 | 0.1  | 0.1  | 0.1  |



|        |       |            |      |      |      |      |      |      |
|--------|-------|------------|------|------|------|------|------|------|
| Q8BPB5 | C298  | reversible | 0.92 | 1.11 | 3.51 | 6.99 | 6.99 | 6.99 |
| Q8BPB5 | C48   | reversible | 0.77 | 1.13 | 0.59 | 0.1  | 0.1  | 0.1  |
| Q8CFX1 | C83   | reversible | 1.2  | 1.56 | 3.72 | 6.99 | 6.99 | 6.99 |
| Q91VM9 | C156  | reversible | 0.64 | 1.27 | 0.59 | 0.1  | 0.1  | 0.1  |
| Q99J39 | C31   | so3h       | 1.04 | 1.17 | 3.56 | 6.99 | 6.99 | 6.99 |
| Q9D051 | C161  | reversible | 0.9  | 1.19 | 3.53 | 6.99 | 6.99 | 6.99 |
| Q9JKB1 | C95   | reversible | 1.35 | 1.22 | 3.67 | 6.99 | 6.99 | 6.99 |
| Q9Z1K6 | C163  | reversible | 1    | 0.91 | 0.6  | 0.1  | 0.1  | 0.1  |
| O88799 | C3240 | so2h       | 0.1  | 0.36 | 0.48 | 0.61 | 1.21 | 0.76 |
| P49817 | C156  | so2h       | 6.99 | 5.64 | 4.67 | 3.69 | 1.02 | 1.11 |
| Q05793 | C1140 | reversible | 6.99 | 5.66 | 4.69 | 3.73 | 1.08 | 1.2  |
| Q5M956 | C140  | reversible | 0.1  | 0.33 | 0.46 | 0.59 | 1.07 | 0.87 |
| Q6PFY8 | C537  | reversible | 6.99 | 5.83 | 4.99 | 4.16 | 1.84 | 1.97 |
| Q8K2A7 | C571  | so2h       | 0.1  | 0.25 | 0.4  | 0.56 | 0.76 | 1.11 |
| P01942 | C105  | reversible | 6.99 | 6.99 | 6.99 | 4.58 | 1.27 | 1.69 |
| P49817 | C143  | so2h       | 6.99 | 6.99 | 6.99 | 4.39 | 1.02 | 1.11 |
| Q69ZK6 | C1674 | so3h       | 0.1  | 0.1  | 0.1  | 0.43 | 1.36 | 0.35 |
| Q8BWF0 | C328  | reversible | 6.99 | 6.99 | 6.99 | 4.37 | 0.9  | 1.12 |
| Q9CXW4 | C72   | reversible | 6.99 | 6.99 | 6.99 | 4.48 | 1.13 | 1.4  |
| Q9DB20 | C141  | so3h       | 6.99 | 6.99 | 6.99 | 4.37 | 0.68 | 1.34 |
| A1L317 | C3    | so3h       | 0.69 | 0.6  | 0.51 | 0.42 | 0.29 | 0.1  |
| A2AHJ4 | C1000 | reversible | 1.01 | 1.93 | 2.85 | 3.77 | 5.15 | 6.99 |
| A2ARZ3 | C2049 | so2h       | 0.67 | 0.58 | 0.49 | 0.41 | 0.28 | 0.1  |
| A2AVA0 | C3004 | so2h       | 1.61 | 2.43 | 3.26 | 4.09 | 5.33 | 6.99 |
| A2AVA0 | C3550 | so2h       | 1.14 | 2.04 | 2.94 | 3.84 | 5.19 | 6.99 |
| A4Q9E5 | C922  | so3h       | 0.74 | 0.64 | 0.54 | 0.45 | 0.3  | 0.1  |
| A6H584 | C1974 | so2h       | 0.96 | 0.83 | 0.7  | 0.56 | 0.37 | 0.1  |
| B1AY10 | C575  | reversible | 1.4  | 2.26 | 3.12 | 3.98 | 5.27 | 6.99 |
| D2J0Y4 | C463  | so2h       | 0.88 | 0.76 | 0.64 | 0.52 | 0.34 | 0.1  |
| F7A4A7 | C1907 | so3h       | 1.35 | 2.21 | 3.08 | 3.95 | 5.25 | 6.99 |
| F7A4A7 | C753  | reversible | 1.21 | 2.1  | 2.99 | 3.88 | 5.21 | 6.99 |
| G3X912 | C76   | so2h       | 1.41 | 2.27 | 3.12 | 3.98 | 5.27 | 6.99 |
| O08550 | C1255 | so3h       | 1.28 | 2.16 | 3.04 | 3.92 | 5.23 | 6.99 |
| O35309 | C183  | reversible | 0.8  | 0.69 | 0.58 | 0.48 | 0.32 | 0.1  |
| O35516 | C1344 | so2h       | 1.4  | 2.26 | 3.12 | 3.98 | 5.27 | 6.99 |
| O35516 | C1349 | so2h       | 1.4  | 2.26 | 3.12 | 3.98 | 5.27 | 6.99 |
| O35516 | C410  | reversible | 1.15 | 2.05 | 2.95 | 3.85 | 5.19 | 6.99 |
| O35598 | C436  | reversible | 1.06 | 1.98 | 2.89 | 3.8  | 5.17 | 6.99 |
| O35643 | C123  | so2h       | 0.95 | 0.82 | 0.69 | 0.56 | 0.37 | 0.1  |

|        |       |            |      |      |      |      |      |      |
|--------|-------|------------|------|------|------|------|------|------|
| O35714 | C45   | reversible | 0.97 | 0.84 | 0.7  | 0.57 | 0.37 | 0.1  |
| O35887 | C13   | so3h       | 1.1  | 2.01 | 2.91 | 3.82 | 5.18 | 6.99 |
| O35914 | C700  | so3h       | 1.28 | 2.16 | 3.04 | 3.92 | 5.23 | 6.99 |
| O55222 | C8    | so2h       | 0.94 | 0.81 | 0.68 | 0.55 | 0.36 | 0.1  |
| O88342 | C225  | so2h       | 1.06 | 1.97 | 2.88 | 3.8  | 5.16 | 6.99 |
| P01029 | C1721 | reversible | 0.79 | 0.69 | 0.58 | 0.47 | 0.32 | 0.1  |
| P06909 | C114  | reversible | 1.01 | 1.93 | 2.85 | 3.77 | 5.15 | 6.99 |
| P06909 | C205  | reversible | 0.45 | 0.4  | 0.34 | 0.29 | 0.21 | 0.1  |
| P06909 | C850  | reversible | 1.47 | 2.32 | 3.17 | 4.02 | 5.29 | 6.99 |
| P07759 | C260  | reversible | 1.57 | 2.41 | 3.24 | 4.07 | 5.32 | 6.99 |
| P08607 | C329  | reversible | 0.89 | 0.77 | 0.65 | 0.53 | 0.35 | 0.1  |
| P09528 | C131  | reversible | 1.39 | 2.25 | 3.11 | 3.97 | 5.27 | 6.99 |
| P09542 | C85   | reversible | 1.05 | 1.96 | 2.88 | 3.79 | 5.16 | 6.99 |
| P10493 | C409  | reversible | 0.92 | 0.8  | 0.67 | 0.54 | 0.36 | 0.1  |
| P11152 | C266  | reversible | 1.06 | 1.97 | 2.88 | 3.8  | 5.17 | 6.99 |
| P11276 | C136  | reversible | 1.31 | 2.18 | 3.06 | 3.93 | 5.24 | 6.99 |
| P11881 | C1646 | so3h       | 2.09 | 2.85 | 3.6  | 4.35 | 5.48 | 6.99 |
| P15105 | C99   | reversible | 1.58 | 2.41 | 3.25 | 4.08 | 5.33 | 6.99 |
| P16858 | C150  | so2h       | 1    | 0.86 | 0.72 | 0.59 | 0.38 | 0.1  |
| P16858 | C154  | so3h       | 1    | 0.86 | 0.72 | 0.59 | 0.38 | 0.1  |
| P17534 | C80   | so2h       | 2.11 | 2.86 | 3.61 | 4.36 | 5.49 | 6.99 |
| P17534 | C86   | so2h       | 0.69 | 0.6  | 0.51 | 0.42 | 0.29 | 0.1  |
| P17534 | C86   | so3h       | 0.91 | 0.79 | 0.67 | 0.54 | 0.35 | 0.1  |
| P17710 | C890  | so3h       | 0.4  | 0.36 | 0.31 | 0.27 | 0.2  | 0.1  |
| P25118 | C99   | so3h       | 0.86 | 0.74 | 0.63 | 0.51 | 0.34 | 0.1  |
| P26041 | C284  | reversible | 0.88 | 0.76 | 0.64 | 0.52 | 0.34 | 0.1  |
| P28078 | C105  | so2h       | 0.93 | 0.8  | 0.67 | 0.55 | 0.36 | 0.1  |
| P28825 | C675  | so2h       | 0.81 | 0.7  | 0.59 | 0.48 | 0.32 | 0.1  |
| P28825 | C680  | so2h       | 0.81 | 0.7  | 0.59 | 0.48 | 0.32 | 0.1  |
| P29788 | C179  | so2h       | 1.02 | 1.94 | 2.86 | 3.78 | 5.15 | 6.99 |
| P31938 | C277  | reversible | 0.78 | 0.67 | 0.57 | 0.47 | 0.31 | 0.1  |
| P37242 | C36   | so2h       | 1.06 | 1.98 | 2.89 | 3.8  | 5.17 | 6.99 |
| P37242 | C93   | so3h       | 0.97 | 0.84 | 0.7  | 0.57 | 0.37 | 0.1  |
| P47791 | C355  | reversible | 0.77 | 0.67 | 0.57 | 0.47 | 0.31 | 0.1  |
| P52431 | C1013 | reversible | 0.65 | 0.57 | 0.48 | 0.4  | 0.27 | 0.1  |
| P52480 | C317  | so3h       | 0.95 | 0.82 | 0.69 | 0.56 | 0.37 | 0.1  |
| P54265 | C217  | so2h       | 0.82 | 0.71 | 0.6  | 0.49 | 0.33 | 0.1  |
| P55066 | C252  | so2h       | 0.88 | 0.76 | 0.64 | 0.52 | 0.34 | 0.1  |
| P56400 | C30   | reversible | 0.78 | 0.68 | 0.57 | 0.47 | 0.31 | 0.1  |

|        |       |            |      |      |      |      |      |      |
|--------|-------|------------|------|------|------|------|------|------|
| P58459 | C1101 | so2h       | 0.92 | 0.79 | 0.67 | 0.54 | 0.36 | 0.1  |
| P61407 | C1227 | so3h       | 0.79 | 0.68 | 0.58 | 0.47 | 0.32 | 0.1  |
| P63260 | C217  | so3h       | 0.95 | 0.82 | 0.69 | 0.56 | 0.36 | 0.1  |
| P68040 | C138  | reversible | 1.16 | 2.06 | 2.96 | 3.85 | 5.2  | 6.99 |
| P70398 | C2238 | so3h       | 1.07 | 1.98 | 2.89 | 3.8  | 5.17 | 6.99 |
| P70398 | C2239 | so3h       | 1.07 | 1.98 | 2.89 | 3.8  | 5.17 | 6.99 |
| P80314 | C395  | reversible | 0.83 | 0.72 | 0.61 | 0.5  | 0.33 | 0.1  |
| P81183 | C121  | reversible | 0.87 | 0.76 | 0.64 | 0.52 | 0.34 | 0.1  |
| P97315 | C143  | so3h       | 0.66 | 0.58 | 0.49 | 0.41 | 0.28 | 0.1  |
| P97315 | C149  | so2h       | 0.66 | 0.58 | 0.49 | 0.41 | 0.28 | 0.1  |
| P97412 | C1983 | reversible | 1.01 | 1.93 | 2.85 | 3.77 | 5.15 | 6.99 |
| P97447 | C276  | reversible | 1.12 | 2.02 | 2.92 | 3.83 | 5.18 | 6.99 |
| P97479 | C1864 | so3h       | 1.19 | 2.08 | 2.97 | 3.87 | 5.21 | 6.99 |
| P97479 | C628  | so2h       | 0.92 | 0.8  | 0.67 | 0.55 | 0.36 | 0.1  |
| P97479 | C705  | so3h       | 0.81 | 0.7  | 0.59 | 0.48 | 0.32 | 0.1  |
| P98156 | C400  | reversible | 1.1  | 2    | 2.91 | 3.82 | 5.18 | 6.99 |
| Q08857 | C311  | so3h       | 1.39 | 2.25 | 3.11 | 3.97 | 5.27 | 6.99 |
| Q08857 | C313  | so2h       | 1.39 | 2.25 | 3.11 | 3.97 | 5.27 | 6.99 |
| Q1XH17 | C86   | reversible | 1.31 | 2.18 | 3.06 | 3.93 | 5.24 | 6.99 |
| Q2TJ95 | C105  | so3h       | 1.77 | 2.57 | 3.37 | 4.18 | 5.38 | 6.99 |
| Q2VLH6 | C364  | reversible | 1.05 | 1.96 | 2.88 | 3.79 | 5.16 | 6.99 |
| Q3TXS7 | C571  | reversible | 1.38 | 2.25 | 3.11 | 3.97 | 5.27 | 6.99 |
| Q3U492 | C529  | reversible | 1    | 0.86 | 0.72 | 0.59 | 0.38 | 0.1  |
| Q3UDW8 | C533  | so2h       | 1.02 | 1.94 | 2.86 | 3.78 | 5.15 | 6.99 |
| Q3UH93 | C1592 | reversible | 1.19 | 2.08 | 2.98 | 3.87 | 5.21 | 6.99 |
| Q3UND0 | C190  | reversible | 0.94 | 0.81 | 0.68 | 0.56 | 0.36 | 0.1  |
| Q3URK3 | C592  | reversible | 1.07 | 1.98 | 2.89 | 3.8  | 5.17 | 6.99 |
| Q497K7 | C204  | so3h       | 0.86 | 0.75 | 0.63 | 0.51 | 0.34 | 0.1  |
| Q4U2R1 | C3880 | so3h       | 0.92 | 0.8  | 0.67 | 0.55 | 0.36 | 0.1  |
| Q52KF3 | C547  | so2h       | 0.64 | 0.56 | 0.48 | 0.39 | 0.27 | 0.1  |
| Q5BKS4 | C118  | so2h       | 1.49 | 2.34 | 3.18 | 4.03 | 5.3  | 6.99 |
| Q5BKS4 | C234  | so3h       | 1.02 | 1.94 | 2.86 | 3.78 | 5.15 | 6.99 |
| Q5DU57 | C267  | reversible | 0.88 | 0.76 | 0.64 | 0.52 | 0.34 | 0.1  |
| Q5DU57 | C274  | reversible | 0.88 | 0.76 | 0.64 | 0.52 | 0.34 | 0.1  |
| Q5NCS9 | C361  | so2h       | 1.03 | 1.95 | 2.86 | 3.78 | 5.16 | 6.99 |
| Q5NCS9 | C364  | so2h       | 1.03 | 1.95 | 2.86 | 3.78 | 5.16 | 6.99 |
| Q5SPV6 | C19   | so3h       | 0.68 | 0.59 | 0.51 | 0.42 | 0.28 | 0.1  |
| Q60675 | C784  | reversible | 1.12 | 2.02 | 2.93 | 3.83 | 5.18 | 6.99 |
| Q60675 | C831  | reversible | 0.89 | 0.77 | 0.65 | 0.53 | 0.35 | 0.1  |

|        |       |            |      |      |      |      |      |      |
|--------|-------|------------|------|------|------|------|------|------|
| Q60766 | C371  | so2h       | 0.41 | 0.36 | 0.32 | 0.27 | 0.2  | 0.1  |
| Q60864 | C282  | reversible | 0.69 | 0.6  | 0.51 | 0.42 | 0.28 | 0.1  |
| Q60930 | C9    | so3h       | 1.73 | 2.54 | 3.35 | 4.16 | 5.37 | 6.99 |
| Q61147 | C275  | reversible | 0.99 | 0.85 | 0.71 | 0.58 | 0.38 | 0.1  |
| Q61543 | C400  | reversible | 0.62 | 0.54 | 0.46 | 0.38 | 0.26 | 0.1  |
| Q61554 | C494  | reversible | 1.77 | 2.57 | 3.38 | 4.18 | 5.38 | 6.99 |
| Q61555 | C512  | so3h       | 0.02 | 0.04 | 0.05 | 0.06 | 0.08 | 0.1  |
| Q61792 | C35   | so2h       | 0.83 | 0.72 | 0.61 | 0.5  | 0.33 | 0.1  |
| Q61830 | C316  | reversible | 1.55 | 2.39 | 3.23 | 4.06 | 5.32 | 6.99 |
| Q62443 | C89   | reversible | 0.96 | 0.83 | 0.7  | 0.57 | 0.37 | 0.1  |
| Q63961 | C184  | reversible | 1.62 | 2.44 | 3.27 | 4.1  | 5.34 | 6.99 |
| Q68FD5 | C1565 | so2h       | 1.15 | 2.05 | 2.95 | 3.85 | 5.19 | 6.99 |
| Q6P9Y7 | C285  | reversible | 1.53 | 2.37 | 3.21 | 4.05 | 5.31 | 6.99 |
| Q6PDK2 | C279  | so2h       | 1    | 0.86 | 0.72 | 0.59 | 0.38 | 0.1  |
| Q6PIC6 | C449  | so2h       | 0.28 | 0.26 | 0.23 | 0.2  | 0.16 | 0.1  |
| Q6PZE0 | C254  | so3h       | 1.12 | 2.03 | 2.93 | 3.83 | 5.19 | 6.99 |
| Q6PZE0 | C795  | so2h       | 0.85 | 0.74 | 0.62 | 0.51 | 0.34 | 0.1  |
| Q6Q899 | C811  | so3h       | 0.99 | 0.85 | 0.72 | 0.58 | 0.38 | 0.1  |
| Q6S5J6 | C396  | reversible | 2.82 | 3.46 | 4.1  | 4.74 | 5.71 | 6.99 |
| Q6ZQM0 | C287  | so3h       | 0.96 | 0.83 | 0.7  | 0.57 | 0.37 | 0.1  |
| Q7TMB8 | C1087 | so2h       | 1.32 | 2.19 | 3.06 | 3.94 | 5.25 | 6.99 |
| Q7TNC6 | C187  | reversible | 0.89 | 0.77 | 0.65 | 0.53 | 0.35 | 0.1  |
| Q7TQJ8 | C318  | so2h       | 0.78 | 0.67 | 0.57 | 0.47 | 0.31 | 0.1  |
| Q7TQJ8 | C321  | so2h       | 0.78 | 0.67 | 0.57 | 0.47 | 0.31 | 0.1  |
| Q7TSV6 | C130  | reversible | 1.19 | 2.08 | 2.98 | 3.87 | 5.21 | 6.99 |
| Q80T14 | C1004 | reversible | 0.92 | 0.8  | 0.67 | 0.54 | 0.36 | 0.1  |
| Q80T79 | C2437 | so2h       | 1.53 | 2.37 | 3.21 | 4.05 | 5.31 | 6.99 |
| Q80UE6 | C409  | reversible | 1.06 | 1.97 | 2.88 | 3.79 | 5.16 | 6.99 |
| Q80WQ8 | C841  | reversible | 1.19 | 2.08 | 2.97 | 3.87 | 5.21 | 6.99 |
| Q80WQ9 | C308  | so3h       | 1.18 | 2.08 | 2.97 | 3.86 | 5.2  | 6.99 |
| Q80Z19 | C2385 | reversible | 0.78 | 0.68 | 0.57 | 0.47 | 0.31 | 0.1  |
| Q80Z19 | C2622 | so3h       | 1.04 | 1.96 | 2.87 | 3.79 | 5.16 | 6.99 |
| Q80ZF8 | C482  | reversible | 1.02 | 1.94 | 2.86 | 3.78 | 5.15 | 6.99 |
| Q80ZF8 | C492  | reversible | 1.02 | 1.94 | 2.86 | 3.78 | 5.15 | 6.99 |
| Q8BG26 | C71   | reversible | 1.17 | 2.07 | 2.96 | 3.86 | 5.2  | 6.99 |
| Q8BGA8 | C309  | reversible | 0.93 | 0.81 | 0.68 | 0.55 | 0.36 | 0.1  |
| Q8BGX0 | C546  | reversible | 1.44 | 2.3  | 3.15 | 4    | 5.28 | 6.99 |
| Q8BHE8 | C43   | so3h       | 1.28 | 2.16 | 3.04 | 3.91 | 5.23 | 6.99 |
| Q8BRH4 | C393  | reversible | 1.04 | 1.96 | 2.87 | 3.79 | 5.16 | 6.99 |

|        |       |            |      |      |      |      |      |      |
|--------|-------|------------|------|------|------|------|------|------|
| Q8BRH4 | C434  | reversible | 0.77 | 0.67 | 0.57 | 0.46 | 0.31 | 0.1  |
| Q8BWF0 | C422  | reversible | 0.98 | 0.85 | 0.71 | 0.58 | 0.37 | 0.1  |
| Q8BX70 | C1092 | so3h       | 3.4  | 3.95 | 4.51 | 5.06 | 5.89 | 6.99 |
| Q8C013 | C31   | reversible | 0.84 | 0.73 | 0.61 | 0.5  | 0.33 | 0.1  |
| Q8C8B0 | C99   | reversible | 0.9  | 0.78 | 0.66 | 0.53 | 0.35 | 0.1  |
| Q8C8R3 | C984  | so3h       | 3.27 | 3.84 | 4.41 | 4.99 | 5.85 | 6.99 |
| Q8CBY3 | C585  | so3h       | 1.18 | 2.08 | 2.97 | 3.86 | 5.2  | 6.99 |
| Q8CFI5 | C22   | so2h       | 0.81 | 0.7  | 0.59 | 0.49 | 0.32 | 0.1  |
| Q8CH72 | C62   | reversible | 0.8  | 0.69 | 0.58 | 0.48 | 0.32 | 0.1  |
| Q8CHY6 | C419  | reversible | 1.36 | 2.23 | 3.09 | 3.96 | 5.26 | 6.99 |
| Q8CI32 | C157  | so2h       | 1.18 | 2.08 | 2.97 | 3.86 | 5.2  | 6.99 |
| Q8JZN5 | C331  | reversible | 0.71 | 0.61 | 0.52 | 0.43 | 0.29 | 0.1  |
| Q8K411 | C619  | reversible | 0.68 | 0.59 | 0.5  | 0.42 | 0.28 | 0.1  |
| Q8VCG4 | C96   | reversible | 0.74 | 0.64 | 0.54 | 0.45 | 0.3  | 0.1  |
| Q8VE47 | C248  | reversible | 1.43 | 2.29 | 3.14 | 4    | 5.28 | 6.99 |
| Q8VEM9 | C297  | reversible | 0.93 | 0.8  | 0.68 | 0.55 | 0.36 | 0.1  |
| Q8VHR5 | C421  | so2h       | 1    | 0.86 | 0.72 | 0.59 | 0.38 | 0.1  |
| Q91VD9 | C179  | so3h       | 1.47 | 2.32 | 3.17 | 4.02 | 5.29 | 6.99 |
| Q91XE4 | C26   | reversible | 0.75 | 0.65 | 0.55 | 0.45 | 0.3  | 0.1  |
| Q91ZE5 | C75   | so2h       | 0.82 | 0.71 | 0.6  | 0.49 | 0.33 | 0.1  |
| Q921H8 | C381  | reversible | 1    | 0.86 | 0.72 | 0.59 | 0.38 | 0.1  |
| Q921I1 | C526  | so2h       | 0.98 | 0.85 | 0.71 | 0.58 | 0.38 | 0.1  |
| Q99K43 | C184  | reversible | 0.89 | 0.77 | 0.65 | 0.53 | 0.35 | 0.1  |
| Q99N87 | C326  | reversible | 1.11 | 2.02 | 2.92 | 3.83 | 5.18 | 6.99 |
| Q99P47 | C960  | so2h       | 1.47 | 2.32 | 3.17 | 4.02 | 5.29 | 6.99 |
| Q9CQF0 | C50   | so3h       | 0.85 | 0.73 | 0.62 | 0.5  | 0.33 | 0.1  |
| Q9CQR4 | C74   | reversible | 1.43 | 2.29 | 3.14 | 4    | 5.28 | 6.99 |
| Q9CR50 | C27   | reversible | 0.99 | 0.86 | 0.72 | 0.58 | 0.38 | 0.1  |
| Q9CR50 | C34   | reversible | 0.99 | 0.86 | 0.72 | 0.58 | 0.38 | 0.1  |
| Q9CU65 | C675  | so3h       | 0.92 | 0.79 | 0.67 | 0.54 | 0.36 | 0.1  |
| Q9CU65 | C680  | so3h       | 0.92 | 0.79 | 0.67 | 0.54 | 0.36 | 0.1  |
| Q9CXJ4 | C444  | reversible | 1.07 | 1.98 | 2.89 | 3.8  | 5.17 | 6.99 |
| Q9CZ30 | C187  | reversible | 0.84 | 0.72 | 0.61 | 0.5  | 0.33 | 0.1  |
| Q9D172 | C175  | reversible | 0.97 | 0.83 | 0.7  | 0.57 | 0.37 | 0.1  |
| Q9D4J7 | C283  | so2h       | 1.04 | 1.96 | 2.87 | 3.79 | 5.16 | 6.99 |
| Q9D6I7 | C347  | reversible | 1.03 | 1.95 | 2.86 | 3.78 | 5.16 | 6.99 |
| Q9D7U6 | C87   | so3h       | 1    | 1.92 | 2.85 | 3.77 | 5.15 | 6.99 |
| Q9DBR3 | C288  | so3h       | 0.99 | 0.85 | 0.72 | 0.58 | 0.38 | 0.1  |
| Q9EPL2 | C557  | reversible | 1.05 | 1.96 | 2.88 | 3.79 | 5.16 | 6.99 |

|        |       |            |      |      |      |      |      |      |
|--------|-------|------------|------|------|------|------|------|------|
| Q9ESD7 | C1253 | so3h       | 0.96 | 0.83 | 0.7  | 0.56 | 0.37 | 0.1  |
| Q9ESN2 | C49   | reversible | 0.9  | 0.78 | 0.66 | 0.53 | 0.35 | 0.1  |
| Q9JHW2 | C170  | reversible | 0.93 | 0.8  | 0.68 | 0.55 | 0.36 | 0.1  |
| Q9QXC1 | C10   | so2h       | 1.09 | 2    | 2.91 | 3.81 | 5.18 | 6.99 |
| Q9QXZ0 | C2880 | so3h       | 0.88 | 0.76 | 0.64 | 0.52 | 0.34 | 0.1  |
| Q9QZ59 | C100  | so3h       | 0.47 | 0.41 | 0.36 | 0.3  | 0.22 | 0.1  |
| Q9QZB9 | C125  | so2h       | 0.89 | 0.77 | 0.65 | 0.53 | 0.35 | 0.1  |
| Q9QZR9 | C1675 | reversible | 1.18 | 2.08 | 2.97 | 3.86 | 5.2  | 6.99 |
| Q9R087 | C244  | so2h       | 0.87 | 0.75 | 0.63 | 0.51 | 0.34 | 0.1  |
| Q9R0L7 | C392  | so2h       | 0.77 | 0.67 | 0.57 | 0.46 | 0.31 | 0.1  |
| Q9WUA3 | C122  | reversible | 1.01 | 1.93 | 2.85 | 3.77 | 5.15 | 6.99 |
| Q9WVH9 | C53   | reversible | 0.94 | 0.82 | 0.69 | 0.56 | 0.36 | 0.1  |
| Q9Z1T6 | C1969 | so3h       | 0.92 | 0.8  | 0.67 | 0.54 | 0.36 | 0.1  |
| Q9Z2I0 | C37   | so3h       | 1.08 | 1.99 | 2.9  | 3.81 | 5.17 | 6.99 |
| Q9Z2I0 | C551  | reversible | 1.1  | 2    | 2.91 | 3.82 | 5.18 | 6.99 |
| A2RT91 | C1309 | so2h       | 1.08 | 3.21 | 4.13 | 6.99 | 6.99 | 6.99 |
| B2RXS4 | C1141 | so2h       | 0.95 | 0.64 | 0.51 | 0.1  | 0.1  | 0.1  |
| B7ZWI3 | C44   | reversible | 1    | 0.68 | 0.54 | 0.1  | 0.1  | 0.1  |
| D2JOY4 | C462  | so2h       | 0.88 | 0.6  | 0.48 | 0.1  | 0.1  | 0.1  |
| E9PV24 | C56   | reversible | 2.41 | 4.07 | 4.78 | 6.99 | 6.99 | 6.99 |
| G3X912 | C80   | so2h       | 1.41 | 3.42 | 4.29 | 6.99 | 6.99 | 6.99 |
| O08524 | C276  | so3h       | 0.92 | 0.62 | 0.5  | 0.1  | 0.1  | 0.1  |
| O08550 | C1005 | so2h       | 0.92 | 0.62 | 0.5  | 0.1  | 0.1  | 0.1  |
| O09118 | C341  | so3h       | 1.13 | 3.25 | 4.16 | 6.99 | 6.99 | 6.99 |
| O09118 | C343  | so3h       | 1.13 | 3.25 | 4.16 | 6.99 | 6.99 | 6.99 |
| O09131 | C191  | reversible | 1.11 | 3.23 | 4.15 | 6.99 | 6.99 | 6.99 |
| O35566 | C185  | reversible | 0.6  | 0.42 | 0.34 | 0.1  | 0.1  | 0.1  |
| O35714 | C44   | reversible | 0.97 | 0.66 | 0.52 | 0.1  | 0.1  | 0.1  |
| O35914 | C717  | so2h       | 0.82 | 0.56 | 0.45 | 0.1  | 0.1  | 0.1  |
| O70481 | C511  | so2h       | 0.9  | 0.61 | 0.49 | 0.1  | 0.1  | 0.1  |
| O88322 | C1317 | reversible | 0.67 | 0.47 | 0.38 | 0.1  | 0.1  | 0.1  |
| O88799 | C3349 | so3h       | 1.2  | 3.29 | 4.19 | 6.99 | 6.99 | 6.99 |
| O88839 | C668  | so2h       | 1.19 | 3.29 | 4.19 | 6.99 | 6.99 | 6.99 |
| P02468 | C1013 | reversible | 1.26 | 3.33 | 4.22 | 6.99 | 6.99 | 6.99 |
| P02468 | C859  | so2h       | 1.02 | 3.18 | 4.11 | 6.99 | 6.99 | 6.99 |
| P02468 | C954  | reversible | 1.25 | 3.32 | 4.22 | 6.99 | 6.99 | 6.99 |
| P06684 | C728  | reversible | 0.81 | 0.55 | 0.44 | 0.1  | 0.1  | 0.1  |
| P06801 | C468  | reversible | 0.73 | 0.5  | 0.41 | 0.1  | 0.1  | 0.1  |
| P06909 | C920  | reversible | 1.23 | 3.31 | 4.21 | 6.99 | 6.99 | 6.99 |

|        |       |            |      |      |      |      |      |      |
|--------|-------|------------|------|------|------|------|------|------|
| P07724 | C289  | so3h       | 0.75 | 0.51 | 0.41 | 0.1  | 0.1  | 0.1  |
| P10925 | C585  | so2h       | 0.59 | 0.42 | 0.34 | 0.1  | 0.1  | 0.1  |
| P11103 | C125  | so2h       | 1.1  | 3.23 | 4.14 | 6.99 | 6.99 | 6.99 |
| P11881 | C1653 | so3h       | 2.09 | 3.86 | 4.62 | 6.99 | 6.99 | 6.99 |
| P12656 | C51   | reversible | 0.85 | 0.58 | 0.46 | 0.1  | 0.1  | 0.1  |
| P17534 | C83   | so2h       | 0.91 | 0.62 | 0.5  | 0.1  | 0.1  | 0.1  |
| P20444 | C143  | so2h       | 1.01 | 3.17 | 4.1  | 6.99 | 6.99 | 6.99 |
| P20918 | C257  | reversible | 1.11 | 3.23 | 4.15 | 6.99 | 6.99 | 6.99 |
| P20918 | C335  | reversible | 1.49 | 3.48 | 4.33 | 6.99 | 6.99 | 6.99 |
| P21981 | C230  | reversible | 1.08 | 3.22 | 4.13 | 6.99 | 6.99 | 6.99 |
| P25118 | C102  | so3h       | 0.86 | 0.59 | 0.47 | 0.1  | 0.1  | 0.1  |
| P28652 | C7    | so3h       | 0.9  | 0.61 | 0.49 | 0.1  | 0.1  | 0.1  |
| P28825 | C686  | so3h       | 0.81 | 0.55 | 0.45 | 0.1  | 0.1  | 0.1  |
| P29341 | C132  | reversible | 1.06 | 3.2  | 4.13 | 6.99 | 6.99 | 6.99 |
| P32261 | C463  | reversible | 0.86 | 0.59 | 0.47 | 0.1  | 0.1  | 0.1  |
| P37889 | C754  | reversible | 1.3  | 3.35 | 4.24 | 6.99 | 6.99 | 6.99 |
| P47962 | C62   | so2h       | 0.9  | 0.61 | 0.49 | 0.1  | 0.1  | 0.1  |
| P48754 | C61   | so3h       | 7.81 | 7.51 | 7.39 | 6.99 | 6.99 | 6.99 |
| P51410 | C134  | reversible | 1.16 | 3.26 | 4.17 | 6.99 | 6.99 | 6.99 |
| P51491 | C311  | so2h       | 0.75 | 0.52 | 0.42 | 0.1  | 0.1  | 0.1  |
| P55849 | C673  | so2h       | 0.88 | 0.6  | 0.48 | 0.1  | 0.1  | 0.1  |
| P59511 | C1495 | so3h       | 0.96 | 0.65 | 0.52 | 0.1  | 0.1  | 0.1  |
| P59644 | C556  | so2h       | 1.43 | 3.44 | 4.3  | 6.99 | 6.99 | 6.99 |
| P59997 | C910  | so2h       | 0.81 | 0.55 | 0.44 | 0.1  | 0.1  | 0.1  |
| P59997 | C912  | so3h       | 0.81 | 0.55 | 0.44 | 0.1  | 0.1  | 0.1  |
| P60882 | C2205 | so2h       | 0.84 | 0.57 | 0.46 | 0.1  | 0.1  | 0.1  |
| P63260 | C217  | reversible | 1.49 | 3.48 | 4.33 | 6.99 | 6.99 | 6.99 |
| P70312 | C102  | reversible | 0.74 | 0.51 | 0.41 | 0.1  | 0.1  | 0.1  |
| P70414 | C762  | reversible | 0.88 | 0.6  | 0.48 | 0.1  | 0.1  | 0.1  |
| P97314 | C143  | so3h       | 1.07 | 3.21 | 4.13 | 6.99 | 6.99 | 6.99 |
| P97315 | C146  | so3h       | 0.66 | 0.46 | 0.37 | 0.1  | 0.1  | 0.1  |
| P98156 | C344  | reversible | 0.73 | 0.5  | 0.41 | 0.1  | 0.1  | 0.1  |
| Q00724 | C178  | reversible | 1.66 | 3.59 | 4.42 | 6.99 | 6.99 | 6.99 |
| Q01721 | C175  | reversible | 0.66 | 0.46 | 0.37 | 0.1  | 0.1  | 0.1  |
| Q05793 | C2456 | so3h       | 2.99 | 4.43 | 5.06 | 6.99 | 6.99 | 6.99 |
| Q07802 | C151  | reversible | 1.37 | 3.4  | 4.27 | 6.99 | 6.99 | 6.99 |
| Q2VLH6 | C576  | reversible | 1.3  | 3.36 | 4.24 | 6.99 | 6.99 | 6.99 |
| Q3TZX3 | C173  | so2h       | 0.91 | 0.62 | 0.49 | 0.1  | 0.1  | 0.1  |
| Q3UDW8 | C532  | so2h       | 1.02 | 3.18 | 4.1  | 6.99 | 6.99 | 6.99 |

|        |       |            |      |      |      |      |      |      |
|--------|-------|------------|------|------|------|------|------|------|
| Q3UHK3 | C1058 | reversible | 0.95 | 0.65 | 0.52 | 0.1  | 0.1  | 0.1  |
| Q3ZRW6 | C116  | reversible | 1.06 | 3.2  | 4.12 | 6.99 | 6.99 | 6.99 |
| Q497K7 | C197  | so3h       | 0.96 | 0.65 | 0.52 | 0.1  | 0.1  | 0.1  |
| Q5DU56 | C325  | reversible | 0.82 | 0.56 | 0.45 | 0.1  | 0.1  | 0.1  |
| Q5NC05 | C903  | so2h       | 1.08 | 3.22 | 4.14 | 6.99 | 6.99 | 6.99 |
| Q5SPW0 | C138  | so2h       | 1.36 | 3.39 | 4.27 | 6.99 | 6.99 | 6.99 |
| Q5XJY6 | C515  | so2h       | 0.63 | 0.44 | 0.36 | 0.1  | 0.1  | 0.1  |
| Q5XJY6 | C70   | so3h       | 1.43 | 3.44 | 4.3  | 6.99 | 6.99 | 6.99 |
| Q5XJY6 | C71   | so3h       | 1.43 | 3.44 | 4.3  | 6.99 | 6.99 | 6.99 |
| Q60585 | C317  | reversible | 0.98 | 0.66 | 0.53 | 0.1  | 0.1  | 0.1  |
| Q60676 | C404  | reversible | 1.63 | 3.57 | 4.4  | 6.99 | 6.99 | 6.99 |
| Q60718 | C636  | reversible | 0.83 | 0.57 | 0.45 | 0.1  | 0.1  | 0.1  |
| Q60766 | C375  | so2h       | 0.87 | 0.59 | 0.47 | 0.1  | 0.1  | 0.1  |
| Q60864 | C278  | reversible | 0.69 | 0.48 | 0.39 | 0.1  | 0.1  | 0.1  |
| Q61543 | C980  | reversible | 1.14 | 3.25 | 4.16 | 6.99 | 6.99 | 6.99 |
| Q61554 | C1008 | reversible | 1.29 | 3.35 | 4.23 | 6.99 | 6.99 | 6.99 |
| Q61554 | C1032 | so3h       | 1.59 | 3.54 | 4.38 | 6.99 | 6.99 | 6.99 |
| Q61554 | C1039 | so3h       | 1.59 | 3.54 | 4.38 | 6.99 | 6.99 | 6.99 |
| Q61554 | C2061 | reversible | 0.88 | 0.6  | 0.48 | 0.1  | 0.1  | 0.1  |
| Q61555 | C2335 | so3h       | 0.87 | 0.6  | 0.48 | 0.1  | 0.1  | 0.1  |
| Q62311 | C231  | so3h       | 0.89 | 0.61 | 0.49 | 0.1  | 0.1  | 0.1  |
| Q64737 | C134  | reversible | 0.96 | 0.65 | 0.52 | 0.1  | 0.1  | 0.1  |
| Q67BT3 | C291  | reversible | 1.39 | 3.41 | 4.28 | 6.99 | 6.99 | 6.99 |
| Q68FE8 | C499  | so3h       | 1.13 | 3.25 | 4.16 | 6.99 | 6.99 | 6.99 |
| Q6A0A9 | C147  | so2h       | 0.61 | 0.43 | 0.35 | 0.1  | 0.1  | 0.1  |
| Q6A0D4 | C192  | reversible | 0.97 | 0.66 | 0.52 | 0.1  | 0.1  | 0.1  |
| Q6A4J8 | C489  | so2h       | 0.85 | 0.58 | 0.47 | 0.1  | 0.1  | 0.1  |
| Q6DIB5 | C167  | so2h       | 0.83 | 0.57 | 0.45 | 0.1  | 0.1  | 0.1  |
| Q6NS46 | C505  | so3h       | 0.9  | 0.61 | 0.49 | 0.1  | 0.1  | 0.1  |
| Q6PB97 | C33   | reversible | 1.16 | 3.27 | 4.18 | 6.99 | 6.99 | 6.99 |
| Q6PDN3 | C486  | so2h       | 0.2  | 0.16 | 0.15 | 0.1  | 0.1  | 0.1  |
| Q6PZE0 | C7340 | reversible | 1.15 | 3.26 | 4.17 | 6.99 | 6.99 | 6.99 |
| Q6Q899 | C814  | so3h       | 0.99 | 0.67 | 0.53 | 0.1  | 0.1  | 0.1  |
| Q6Q899 | C819  | so3h       | 0.99 | 0.67 | 0.53 | 0.1  | 0.1  | 0.1  |
| Q6V595 | C337  | so2h       | 1.18 | 3.28 | 4.18 | 6.99 | 6.99 | 6.99 |
| Q6X6Z7 | C76   | reversible | 1.12 | 3.24 | 4.15 | 6.99 | 6.99 | 6.99 |
| Q6ZWR4 | C250  | so3h       | 0.85 | 0.58 | 0.46 | 0.1  | 0.1  | 0.1  |
| Q769J6 | C700  | so2h       | 0.95 | 0.64 | 0.51 | 0.1  | 0.1  | 0.1  |
| Q7TQ48 | C648  | reversible | 0.99 | 0.67 | 0.53 | 0.1  | 0.1  | 0.1  |



|        |       |            |      |      |      |      |      |      |
|--------|-------|------------|------|------|------|------|------|------|
| Q80WQ9 | C305  | so3h       | 1.18 | 3.28 | 4.18 | 6.99 | 6.99 | 6.99 |
| Q80Y50 | C27   | so2h       | 0.72 | 0.5  | 0.4  | 0.1  | 0.1  | 0.1  |
| Q80Y50 | C31   | so2h       | 0.72 | 0.5  | 0.4  | 0.1  | 0.1  | 0.1  |
| Q80Z19 | C2619 | so3h       | 1.04 | 3.19 | 4.11 | 6.99 | 6.99 | 6.99 |
| Q8BFY9 | C862  | reversible | 1.06 | 3.2  | 4.12 | 6.99 | 6.99 | 6.99 |
| Q8BGS3 | C383  | reversible | 1.12 | 3.24 | 4.15 | 6.99 | 6.99 | 6.99 |
| Q8BKV0 | C90   | so2h       | 1.03 | 3.18 | 4.11 | 6.99 | 6.99 | 6.99 |
| Q8BMF3 | C275  | reversible | 0.91 | 0.62 | 0.49 | 0.1  | 0.1  | 0.1  |
| Q8BPM0 | C160  | so2h       | 1    | 0.67 | 0.54 | 0.1  | 0.1  | 0.1  |
| Q8BQZ5 | C116  | so2h       | 1.26 | 3.33 | 4.22 | 6.99 | 6.99 | 6.99 |
| Q8BU30 | C27   | so3h       | 0.82 | 0.56 | 0.45 | 0.1  | 0.1  | 0.1  |
| Q8BX09 | C212  | so2h       | 0.85 | 0.58 | 0.47 | 0.1  | 0.1  | 0.1  |
| Q8BX46 | C210  | so2h       | 0.4  | 0.29 | 0.25 | 0.1  | 0.1  | 0.1  |
| Q8BX70 | C1096 | so2h       | 3.4  | 4.7  | 5.26 | 6.99 | 6.99 | 6.99 |
| Q8C0S4 | C461  | reversible | 1    | 0.68 | 0.54 | 0.1  | 0.1  | 0.1  |
| Q8C5V5 | C488  | so2h       | 1.4  | 3.42 | 4.29 | 6.99 | 6.99 | 6.99 |
| Q8C7R4 | C721  | reversible | 1    | 3.16 | 4.1  | 6.99 | 6.99 | 6.99 |
| Q8CH72 | C65   | reversible | 0.8  | 0.55 | 0.44 | 0.1  | 0.1  | 0.1  |
| Q8CHY6 | C425  | reversible | 1.4  | 3.42 | 4.29 | 6.99 | 6.99 | 6.99 |
| Q8CI94 | C143  | reversible | 0.71 | 0.49 | 0.4  | 0.1  | 0.1  | 0.1  |
| Q8CJ27 | C882  | so3h       | 1.22 | 3.3  | 4.2  | 6.99 | 6.99 | 6.99 |
| Q8CJ69 | C105  | reversible | 1.01 | 3.17 | 4.1  | 6.99 | 6.99 | 6.99 |
| Q8JZZ6 | C153  | reversible | 0.32 | 0.24 | 0.21 | 0.1  | 0.1  | 0.1  |
| Q8K0E8 | C213  | so2h       | 1.29 | 3.35 | 4.24 | 6.99 | 6.99 | 6.99 |
| Q8K1R3 | C4    | so2h       | 1.19 | 3.28 | 4.19 | 6.99 | 6.99 | 6.99 |
| Q8QZZ7 | C167  | reversible | 1.11 | 3.23 | 4.15 | 6.99 | 6.99 | 6.99 |
| Q8R1G2 | C198  | so3h       | 7.86 | 7.54 | 7.41 | 6.99 | 6.99 | 6.99 |
| Q8R2Q4 | C329  | reversible | 1.36 | 3.39 | 4.27 | 6.99 | 6.99 | 6.99 |
| Q8VCM7 | C164  | reversible | 1.87 | 3.72 | 4.51 | 6.99 | 6.99 | 6.99 |
| Q8VDI7 | C43   | so3h       | 1.01 | 3.17 | 4.1  | 6.99 | 6.99 | 6.99 |
| Q8VE19 | C775  | so2h       | 0.73 | 0.5  | 0.41 | 0.1  | 0.1  | 0.1  |
| Q8VEE1 | C31   | so2h       | 0.96 | 0.65 | 0.52 | 0.1  | 0.1  | 0.1  |
| Q8VHR5 | C410  | so2h       | 1    | 0.68 | 0.54 | 0.1  | 0.1  | 0.1  |
| Q91VD9 | C176  | so2h       | 1.47 | 3.46 | 4.32 | 6.99 | 6.99 | 6.99 |
| Q91VD9 | C182  | so3h       | 1.47 | 3.46 | 4.32 | 6.99 | 6.99 | 6.99 |
| Q91WG7 | C396  | reversible | 0.6  | 0.42 | 0.34 | 0.1  | 0.1  | 0.1  |
| Q91YP0 | C273  | reversible | 0.94 | 0.64 | 0.51 | 0.1  | 0.1  | 0.1  |
| Q91ZX7 | C3342 | so3h       | 0.6  | 0.42 | 0.35 | 0.1  | 0.1  | 0.1  |
| Q924D0 | C130  | so3h       | 0.84 | 0.57 | 0.46 | 0.1  | 0.1  | 0.1  |

|        |       |            |      |      |      |      |      |      |
|--------|-------|------------|------|------|------|------|------|------|
| Q99J39 | C447  | reversible | 1.13 | 3.25 | 4.16 | 6.99 | 6.99 | 6.99 |
| Q99KE8 | C336  | reversible | 1    | 0.68 | 0.54 | 0.1  | 0.1  | 0.1  |
| Q99KI0 | C410  | reversible | 0.52 | 0.37 | 0.3  | 0.1  | 0.1  | 0.1  |
| Q99LD4 | C51   | so2h       | 1.08 | 3.22 | 4.14 | 6.99 | 6.99 | 6.99 |
| Q99N48 | C103  | reversible | 0.66 | 0.46 | 0.37 | 0.1  | 0.1  | 0.1  |
| Q99NB9 | C965  | so3h       | 1.35 | 3.39 | 4.27 | 6.99 | 6.99 | 6.99 |
| Q99P47 | C964  | so3h       | 1.47 | 3.47 | 4.32 | 6.99 | 6.99 | 6.99 |
| Q99PQ2 | C114  | reversible | 1.48 | 3.47 | 4.33 | 6.99 | 6.99 | 6.99 |
| Q9CPY7 | C445  | reversible | 0.82 | 0.56 | 0.45 | 0.1  | 0.1  | 0.1  |
| Q9CQ29 | C56   | reversible | 1.12 | 3.24 | 4.16 | 6.99 | 6.99 | 6.99 |
| Q9CQ29 | C57   | reversible | 1.12 | 3.24 | 4.16 | 6.99 | 6.99 | 6.99 |
| Q9CQ65 | C163  | so3h       | 0.7  | 0.49 | 0.39 | 0.1  | 0.1  | 0.1  |
| Q9CU65 | C683  | so2h       | 0.92 | 0.63 | 0.5  | 0.1  | 0.1  | 0.1  |
| Q9CUU3 | C674  | reversible | 1.04 | 3.19 | 4.11 | 6.99 | 6.99 | 6.99 |
| Q9CXE0 | C432  | reversible | 0.84 | 0.57 | 0.46 | 0.1  | 0.1  | 0.1  |
| Q9CYQ7 | C6    | reversible | 1.13 | 3.25 | 4.16 | 6.99 | 6.99 | 6.99 |
| Q9CZU6 | C359  | so2h       | 1.17 | 3.27 | 4.18 | 6.99 | 6.99 | 6.99 |
| Q9D0K2 | C235  | so3h       | 0.93 | 0.63 | 0.5  | 0.1  | 0.1  | 0.1  |
| Q9D2G2 | C105  | reversible | 1.28 | 3.35 | 4.23 | 6.99 | 6.99 | 6.99 |
| Q9D2H6 | C504  | reversible | 0.83 | 0.57 | 0.45 | 0.1  | 0.1  | 0.1  |
| Q9D6E4 | C219  | reversible | 1.32 | 3.36 | 4.25 | 6.99 | 6.99 | 6.99 |
| Q9D6F9 | C239  | reversible | 1    | 0.67 | 0.54 | 0.1  | 0.1  | 0.1  |
| Q9D8W7 | C134  | so2h       | 1.22 | 3.3  | 4.2  | 6.99 | 6.99 | 6.99 |
| Q9DB26 | C49   | reversible | 1.26 | 3.33 | 4.22 | 6.99 | 6.99 | 6.99 |
| Q9DBJ1 | C153  | reversible | 1.07 | 3.21 | 4.13 | 6.99 | 6.99 | 6.99 |
| Q9EQJ0 | C207  | so2h       | 1.04 | 3.19 | 4.12 | 6.99 | 6.99 | 6.99 |
| Q9ESD7 | C1255 | so3h       | 0.96 | 0.65 | 0.52 | 0.1  | 0.1  | 0.1  |
| Q9JIP3 | C87   | reversible | 0.92 | 0.63 | 0.5  | 0.1  | 0.1  | 0.1  |
| Q9JJB1 | C208  | so3h       | 1.01 | 3.17 | 4.1  | 6.99 | 6.99 | 6.99 |
| Q9QUH0 | C23   | so2h       | 1.09 | 3.22 | 4.14 | 6.99 | 6.99 | 6.99 |
| Q9QUH0 | C26   | so2h       | 1.09 | 3.22 | 4.14 | 6.99 | 6.99 | 6.99 |
| Q9QXC1 | C15   | so2h       | 0.98 | 0.67 | 0.53 | 0.1  | 0.1  | 0.1  |
| Q9QXK2 | C207  | so3h       | 0.63 | 0.44 | 0.36 | 0.1  | 0.1  | 0.1  |
| Q9QZ59 | C103  | so3h       | 0.47 | 0.34 | 0.28 | 0.1  | 0.1  | 0.1  |
| Q9QZB9 | C126  | so2h       | 0.89 | 0.61 | 0.48 | 0.1  | 0.1  | 0.1  |
| Q9QZF2 | C12   | so3h       | 0.61 | 0.43 | 0.35 | 0.1  | 0.1  | 0.1  |
| Q9QZF2 | C20   | so2h       | 0.61 | 0.43 | 0.35 | 0.1  | 0.1  | 0.1  |
| Q9R016 | C1170 | reversible | 0.77 | 0.53 | 0.43 | 0.1  | 0.1  | 0.1  |
| Q9R087 | C270  | so3h       | 0.63 | 0.44 | 0.36 | 0.1  | 0.1  | 0.1  |

|        |       |            |      |      |      |      |      |      |
|--------|-------|------------|------|------|------|------|------|------|
| Q9R1A3 | C374  | so2h       | 1.1  | 3.23 | 4.15 | 6.99 | 6.99 | 6.99 |
| Q9R1A3 | C376  | so3h       | 1.1  | 3.23 | 4.15 | 6.99 | 6.99 | 6.99 |
| Q9R1B9 | C1478 | so2h       | 0.88 | 0.6  | 0.48 | 0.1  | 0.1  | 0.1  |
| Q9WUB0 | C471  | so2h       | 0.96 | 0.65 | 0.52 | 0.1  | 0.1  | 0.1  |
| Q9WUU9 | C1260 | reversible | 0.72 | 0.5  | 0.4  | 0.1  | 0.1  | 0.1  |
| Q9WVQ5 | C31   | reversible | 0.94 | 0.64 | 0.51 | 0.1  | 0.1  | 0.1  |
| Q9Z0E2 | C111  | reversible | 0.57 | 0.4  | 0.33 | 0.1  | 0.1  | 0.1  |
| Q9Z0F8 | C635  | reversible | 1.23 | 3.31 | 4.21 | 6.99 | 6.99 | 6.99 |
| Q9Z2E2 | C368  | reversible | 1.07 | 3.21 | 4.13 | 6.99 | 6.99 | 6.99 |
| Q9Z2E2 | C374  | reversible | 0.91 | 0.62 | 0.49 | 0.1  | 0.1  | 0.1  |
| A2ARA8 | C21   | so3h       | 0.1  | 0.21 | 0.31 | 0.41 | 0.56 | 0.76 |
| A2ARA8 | C22   | so3h       | 0.1  | 0.21 | 0.31 | 0.41 | 0.56 | 0.76 |
| A2ASS6 | C6705 | so2h       | 0.1  | 0.22 | 0.34 | 0.46 | 0.63 | 0.87 |
| B1AY10 | C720  | reversible | 6.99 | 6.11 | 5.23 | 4.34 | 3.02 | 1.26 |
| D3Z423 | C30   | reversible | 0.1  | 0.22 | 0.33 | 0.45 | 0.62 | 0.84 |
| O08529 | C39   | reversible | 6.99 | 6.1  | 5.2  | 4.31 | 2.96 | 1.17 |
| O08709 | C47   | so2h       | 0.1  | 0.11 | 0.11 | 0.12 | 0.12 | 0.13 |
| O35118 | C236  | so2h       | 6.99 | 6.22 | 5.45 | 4.68 | 3.52 | 1.98 |
| O88516 | C424  | reversible | 6.99 | 6.09 | 5.19 | 4.29 | 2.93 | 1.13 |
| P06151 | C163  | so3h       | 6.99 | 6.19 | 5.39 | 4.59 | 3.38 | 1.78 |
| P07724 | C385  | so3h       | 6.99 | 6.33 | 5.67 | 5.01 | 4.02 | 2.7  |
| P08249 | C93   | so3h       | 6.99 | 6.14 | 5.29 | 4.44 | 3.16 | 1.46 |
| P10493 | C712  | reversible | 6.99 | 6.09 | 5.19 | 4.3  | 2.95 | 1.15 |
| P14152 | C137  | so3h       | 6.99 | 6.11 | 5.23 | 4.35 | 3.04 | 1.28 |
| P26262 | C383  | reversible | 6.99 | 6.08 | 5.18 | 4.27 | 2.91 | 1.1  |
| P33434 | C21   | so3h       | 6.99 | 6.13 | 5.28 | 4.42 | 3.14 | 1.42 |
| P33434 | C22   | so3h       | 6.99 | 6.13 | 5.28 | 4.42 | 3.14 | 1.42 |
| P34960 | C3    | reversible | 6.99 | 6.18 | 5.38 | 4.57 | 3.36 | 1.75 |
| P35235 | C104  | reversible | 6.99 | 6.08 | 5.17 | 4.27 | 2.9  | 1.09 |
| P42227 | C251  | so2h       | 0.1  | 0.24 | 0.37 | 0.51 | 0.71 | 0.98 |
| P46660 | C182  | reversible | 6.99 | 6.21 | 5.43 | 4.65 | 3.48 | 1.92 |
| P47226 | C414  | so3h       | 6.99 | 6.18 | 5.37 | 4.56 | 3.34 | 1.72 |
| P53702 | C182  | reversible | 6.99 | 6.13 | 5.26 | 4.39 | 3.1  | 1.37 |
| P54071 | C336  | reversible | 0.1  | 0.22 | 0.33 | 0.44 | 0.61 | 0.83 |
| P56400 | C26   | reversible | 0.1  | 0.22 | 0.34 | 0.46 | 0.64 | 0.88 |
| P60867 | C36   | reversible | 6.99 | 6.12 | 5.26 | 4.39 | 3.09 | 1.36 |
| P62259 | C97   | so2h       | 6.99 | 6.12 | 5.24 | 4.37 | 3.05 | 1.3  |
| Q05920 | C372  | reversible | 0.1  | 0.1  | 0.09 | 0.09 | 0.08 | 0.07 |
| Q07417 | C109  | reversible | 0.1  | 0.2  | 0.29 | 0.38 | 0.51 | 0.69 |

|        |       |            |      |      |      |      |      |      |
|--------|-------|------------|------|------|------|------|------|------|
| Q0KK56 | C573  | so2h       | 6.99 | 6.08 | 5.16 | 4.25 | 2.88 | 1.05 |
| Q2LKU9 | C334  | so3h       | 6.99 | 6.08 | 5.18 | 4.27 | 2.91 | 1.09 |
| Q2VLH6 | C139  | so2h       | 6.99 | 6.08 | 5.16 | 4.25 | 2.88 | 1.05 |
| Q3TWL2 | C140  | so3h       | 6.99 | 6.23 | 5.46 | 4.7  | 3.55 | 2.02 |
| Q3TXX3 | C381  | reversible | 0.1  | 0.22 | 0.34 | 0.46 | 0.64 | 0.88 |
| Q3TXX3 | C382  | reversible | 0.1  | 0.22 | 0.34 | 0.46 | 0.64 | 0.88 |
| Q3UV16 | C300  | reversible | 6.99 | 6.13 | 5.27 | 4.41 | 3.12 | 1.4  |
| Q3UXZ9 | C1166 | so3h       | 0.1  | 0.23 | 0.35 | 0.47 | 0.65 | 0.9  |
| Q3UXZ9 | C1177 | so3h       | 6.99 | 6.1  | 5.21 | 4.32 | 2.98 | 1.2  |
| Q3V0C1 | C294  | so2h       | 6.99 | 6.17 | 5.35 | 4.53 | 3.3  | 1.66 |
| Q3V384 | C100  | reversible | 6.99 | 6.07 | 5.16 | 4.24 | 2.86 | 1.03 |
| Q3V3R4 | C548  | so2h       | 0.1  | 0.19 | 0.27 | 0.36 | 0.48 | 0.65 |
| Q4VC17 | C1158 | so2h       | 6.99 | 6.08 | 5.18 | 4.27 | 2.91 | 1.1  |
| Q5NC05 | C902  | so2h       | 0.1  | 0.23 | 0.36 | 0.49 | 0.69 | 0.94 |
| Q5U405 | C290  | so2h       | 6.99 | 6.43 | 5.87 | 5.31 | 4.47 | 3.35 |
| Q61554 | C1081 | reversible | 6.99 | 6.09 | 5.19 | 4.3  | 2.95 | 1.15 |
| Q62178 | C497  | so2h       | 0.1  | 0.21 | 0.31 | 0.41 | 0.56 | 0.76 |
| Q62312 | C79   | reversible | 6.99 | 6.13 | 5.27 | 4.42 | 3.13 | 1.41 |
| Q64518 | C349  | reversible | 0.1  | 0.24 | 0.38 | 0.51 | 0.71 | 0.98 |
| Q64518 | C447  | reversible | 6.99 | 6.12 | 5.25 | 4.38 | 3.08 | 1.34 |
| Q64518 | C636  | reversible | 6.99 | 6.08 | 5.18 | 4.27 | 2.91 | 1.1  |
| Q64527 | C336  | so3h       | 6.99 | 6.1  | 5.2  | 4.31 | 2.96 | 1.17 |
| Q69Z69 | C760  | reversible | 6.99 | 6.09 | 5.18 | 4.28 | 2.92 | 1.12 |
| Q69ZK6 | C1679 | so2h       | 0.1  | 0.14 | 0.18 | 0.22 | 0.28 | 0.35 |
| Q6NS59 | C1429 | reversible | 0.1  | 0.23 | 0.35 | 0.48 | 0.66 | 0.91 |
| Q6P1B1 | C316  | so3h       | 6.99 | 6.07 | 5.15 | 4.23 | 2.85 | 1.01 |
| Q6P1G2 | C1070 | so2h       | 6.99 | 6.08 | 5.18 | 4.27 | 2.91 | 1.1  |
| Q6P1G2 | C589  | so3h       | 6.99 | 6.14 | 5.29 | 4.45 | 3.17 | 1.48 |
| Q6R6I7 | C40   | so2h       | 6.99 | 6.46 | 5.93 | 5.4  | 4.6  | 3.54 |
| Q6R6I7 | C47   | so2h       | 6.99 | 6.46 | 5.93 | 5.4  | 4.6  | 3.54 |
| Q6ZWW3 | C80   | so2h       | 6.99 | 6.08 | 5.18 | 4.27 | 2.91 | 1.09 |
| Q7TNG5 | C301  | reversible | 0.1  | 0.24 | 0.37 | 0.5  | 0.69 | 0.96 |
| Q7TNM2 | C249  | so3h       | 6.99 | 6.23 | 5.46 | 4.69 | 3.55 | 2.02 |
| Q7TPQ9 | C183  | so3h       | 6.99 | 6.25 | 5.52 | 4.78 | 3.67 | 2.19 |
| Q80SU3 | C341  | reversible | 6.99 | 6.11 | 5.23 | 4.35 | 3.03 | 1.27 |
| Q80UG2 | C137  | reversible | 6.99 | 6.09 | 5.18 | 4.28 | 2.93 | 1.12 |
| Q80UG2 | C813  | reversible | 0.1  | 0.23 | 0.36 | 0.48 | 0.67 | 0.93 |
| Q80UJ1 | C435  | so2h       | 0.1  | 0.24 | 0.38 | 0.51 | 0.72 | 0.99 |
| Q80UL9 | C45   | so2h       | 0.1  | 0.24 | 0.37 | 0.5  | 0.7  | 0.96 |

|        |       |            |      |      |      |      |      |      |
|--------|-------|------------|------|------|------|------|------|------|
| Q80UW0 | C258  | reversible | 0.1  | 0.23 | 0.35 | 0.47 | 0.66 | 0.9  |
| Q8BIV3 | C690  | so2h       | 0.1  | 0.24 | 0.38 | 0.52 | 0.72 | 1    |
| Q8BKX6 | C1021 | reversible | 0.1  | 0.13 | 0.16 | 0.18 | 0.22 | 0.27 |
| Q8BMF3 | C82   | reversible | 0.1  | 0.19 | 0.28 | 0.36 | 0.49 | 0.67 |
| Q8BWQ6 | C303  | so3h       | 6.99 | 6.08 | 5.16 | 4.25 | 2.88 | 1.06 |
| Q8BWQ6 | C315  | so3h       | 6.99 | 6.08 | 5.16 | 4.25 | 2.88 | 1.06 |
| Q8BWR2 | C42   | reversible | 6.99 | 6.09 | 5.19 | 4.29 | 2.94 | 1.15 |
| Q8BYL4 | C408  | reversible | 6.99 | 6.08 | 5.16 | 4.24 | 2.87 | 1.04 |
| Q8CBA2 | C353  | reversible | 6.99 | 6.14 | 5.28 | 4.43 | 3.15 | 1.44 |
| Q8CD54 | C1703 | reversible | 6.99 | 6.15 | 5.3  | 4.45 | 3.18 | 1.49 |
| Q8CFG4 | C110  | so3h       | 6.99 | 6.16 | 5.32 | 4.48 | 3.23 | 1.56 |
| Q8CGY6 | C784  | reversible | 6.99 | 6.08 | 5.16 | 4.25 | 2.87 | 1.04 |
| Q8K0C4 | C345  | so2h       | 6.99 | 6.1  | 5.2  | 4.31 | 2.96 | 1.17 |
| Q8K1J6 | C21   | so3h       | 0.1  | 0.23 | 0.35 | 0.47 | 0.65 | 0.89 |
| Q8K224 | C486  | reversible | 0.1  | 0.22 | 0.34 | 0.45 | 0.63 | 0.86 |
| Q8R0W0 | C2412 | reversible | 0.1  | 0.22 | 0.34 | 0.46 | 0.64 | 0.88 |
| Q91VW5 | C1203 | so2h       | 6.99 | 6.15 | 5.31 | 4.46 | 3.2  | 1.51 |
| Q91Z83 | C947  | reversible | 0.1  | 0.18 | 0.26 | 0.34 | 0.46 | 0.62 |
| Q91ZJ5 | C276  | so3h       | 6.99 | 6.09 | 5.18 | 4.28 | 2.93 | 1.12 |
| Q91ZT9 | C237  | reversible | 0.1  | 0.23 | 0.35 | 0.47 | 0.66 | 0.9  |
| Q91ZX7 | C4340 | so2h       | 6.99 | 6.08 | 5.16 | 4.24 | 2.87 | 1.04 |
| Q921F4 | C284  | reversible | 0.1  | 0.23 | 0.36 | 0.48 | 0.67 | 0.93 |
| Q923J1 | C36   | so3h       | 6.99 | 6.16 | 5.34 | 4.51 | 3.27 | 1.61 |
| Q924C1 | C44   | so2h       | 6.99 | 6.15 | 5.31 | 4.47 | 3.2  | 1.52 |
| Q99J62 | C194  | so3h       | 6.99 | 6.08 | 5.16 | 4.25 | 2.87 | 1.04 |
| Q99KE1 | C190  | so3h       | 6.99 | 6.09 | 5.19 | 4.29 | 2.94 | 1.14 |
| Q99KI0 | C126  | so3h       | 6.99 | 6.09 | 5.19 | 4.29 | 2.94 | 1.14 |
| Q99KI0 | C385  | so3h       | 6.99 | 6.12 | 5.25 | 4.38 | 3.08 | 1.34 |
| Q99N64 | C183  | so3h       | 0.1  | 0.19 | 0.28 | 0.37 | 0.5  | 0.68 |
| Q9CR25 | C47   | so3h       | 6.99 | 6.11 | 5.23 | 4.35 | 3.03 | 1.27 |
| Q9CU24 | C148  | so2h       | 0.1  | 0.21 | 0.31 | 0.41 | 0.56 | 0.76 |
| Q9CU65 | C726  | so3h       | 0.1  | 0.19 | 0.28 | 0.37 | 0.51 | 0.69 |
| Q9CZ13 | C410  | so3h       | 6.99 | 6.11 | 5.22 | 4.34 | 3.01 | 1.24 |
| Q9D0E1 | C708  | so3h       | 6.99 | 6.09 | 5.19 | 4.28 | 2.93 | 1.12 |
| Q9D0M3 | C139  | reversible | 6.99 | 6.21 | 5.42 | 4.63 | 3.46 | 1.88 |
| Q9D2H5 | C8    | reversible | 6.99 | 6.08 | 5.17 | 4.26 | 2.89 | 1.07 |
| Q9D8M7 | C432  | reversible | 0.1  | 0.24 | 0.38 | 0.51 | 0.71 | 0.98 |
| Q9DA16 | C151  | so3h       | 0.1  | 0.18 | 0.25 | 0.33 | 0.44 | 0.59 |
| Q9DB77 | C192  | so3h       | 6.99 | 6.09 | 5.19 | 4.29 | 2.94 | 1.14 |

|        |       |            |      |      |      |      |      |      |
|--------|-------|------------|------|------|------|------|------|------|
| Q9EQW7 | C1430 | so3h       | 0.1  | 0.14 | 0.18 | 0.21 | 0.27 | 0.34 |
| Q9ER04 | C206  | so2h       | 6.99 | 6.3  | 5.61 | 4.92 | 3.89 | 2.51 |
| Q9ER04 | C209  | so2h       | 6.99 | 6.3  | 5.61 | 4.92 | 3.89 | 2.51 |
| Q9ERU9 | C1366 | reversible | 0.1  | 0.23 | 0.36 | 0.49 | 0.68 | 0.94 |
| Q9JLV5 | C462  | so3h       | 0.1  | 0.2  | 0.29 | 0.39 | 0.53 | 0.72 |
| Q9QWK5 | C1164 | so3h       | 0.1  | 0.2  | 0.3  | 0.4  | 0.54 | 0.74 |
| Q9QZC7 | C62   | reversible | 0.1  | 0.2  | 0.3  | 0.4  | 0.55 | 0.75 |
| Q9WTL4 | C280  | reversible | 6.99 | 6.1  | 5.21 | 4.33 | 2.99 | 1.22 |
| Q9WUA3 | C717  | so3h       | 6.99 | 6.12 | 5.25 | 4.38 | 3.07 | 1.33 |
| Q9WUB0 | C211  | reversible | 0.1  | 0.22 | 0.34 | 0.46 | 0.64 | 0.88 |
| Q9Z2U2 | C1931 | so3h       | 6.99 | 6.11 | 5.23 | 4.35 | 3.03 | 1.26 |
| A2AGL3 | C2226 | reversible | 6.99 | 6.99 | 6.99 | 4.89 | 3.4  | 1.06 |
| A2AVA0 | C1595 | reversible | 0.1  | 0.1  | 0.1  | 0.3  | 0.44 | 0.66 |
| A2RSQ0 | C193  | so2h       | 0.1  | 0.1  | 0.1  | 0.38 | 0.58 | 0.89 |
| O08709 | C47   | so3h       | 0.1  | 0.1  | 0.1  | 0.4  | 0.6  | 0.93 |
| O35118 | C245  | so2h       | 6.99 | 6.99 | 6.99 | 5.22 | 3.96 | 1.98 |
| O35453 | C400  | so3h       | 0.1  | 0.1  | 0.1  | 0.39 | 0.59 | 0.91 |
| O54775 | C153  | reversible | 0.1  | 0.1  | 0.1  | 0.39 | 0.59 | 0.91 |
| O88799 | C3120 | so2h       | 0.1  | 0.1  | 0.1  | 0.31 | 0.45 | 0.67 |
| O88799 | C3221 | so3h       | 0.1  | 0.1  | 0.1  | 0.19 | 0.26 | 0.36 |
| P00342 | C163  | so3h       | 6.99 | 6.99 | 6.99 | 4.97 | 3.54 | 1.28 |
| P00520 | C5    | so3h       | 6.99 | 6.99 | 6.99 | 5.01 | 3.61 | 1.4  |
| P05125 | C145  | reversible | 0.1  | 0.1  | 0.1  | 0.37 | 0.56 | 0.86 |
| P08249 | C89   | so2h       | 6.99 | 6.99 | 6.99 | 5.03 | 3.64 | 1.46 |
| P0CW02 | C78   | so3h       | 0.1  | 0.1  | 0.1  | 0.3  | 0.45 | 0.67 |
| P15265 | C40   | reversible | 6.99 | 6.99 | 6.99 | 5.35 | 4.19 | 2.36 |
| P19221 | C215  | reversible | 6.99 | 6.99 | 6.99 | 4.97 | 3.53 | 1.28 |
| P21278 | C330  | reversible | 0.1  | 0.1  | 0.1  | 0.38 | 0.58 | 0.89 |
| P26039 | C1661 | so2h       | 6.99 | 6.99 | 6.99 | 5.03 | 3.65 | 1.47 |
| P26039 | C1671 | so3h       | 6.99 | 6.99 | 6.99 | 5.03 | 3.65 | 1.47 |
| P26043 | C117  | reversible | 6.99 | 6.99 | 6.99 | 4.9  | 3.43 | 1.1  |
| P29268 | C241  | so2h       | 0.1  | 0.1  | 0.1  | 0.37 | 0.55 | 0.84 |
| P30416 | C103  | so2h       | 6.99 | 6.99 | 6.99 | 4.88 | 3.38 | 1.03 |
| P35385 | C125  | so2h       | 0.1  | 0.1  | 0.1  | 0.32 | 0.47 | 0.71 |
| P45376 | C299  | so3h       | 6.99 | 6.99 | 6.99 | 4.94 | 3.5  | 1.22 |
| P47226 | C418  | so3h       | 6.99 | 6.99 | 6.99 | 5.12 | 3.8  | 1.72 |
| P48754 | C44   | reversible | 6.99 | 6.99 | 6.99 | 5.57 | 4.57 | 2.99 |
| P50543 | C8    | so3h       | 0.1  | 0.1  | 0.1  | 0.35 | 0.53 | 0.8  |
| P52503 | C79   | so3h       | 6.99 | 6.99 | 6.99 | 4.93 | 3.48 | 1.18 |

|        |       |            |      |      |      |      |      |      |
|--------|-------|------------|------|------|------|------|------|------|
| P55098 | C138  | so2h       | 0.1  | 0.1  | 0.1  | 0.36 | 0.53 | 0.81 |
| P59222 | C278  | reversible | 6.99 | 6.99 | 6.99 | 4.91 | 3.43 | 1.11 |
| P62259 | C98   | so2h       | 6.99 | 6.99 | 6.99 | 4.98 | 3.55 | 1.3  |
| Q01065 | C409  | reversible | 0.1  | 0.1  | 0.1  | 0.3  | 0.44 | 0.66 |
| Q04592 | C1599 | reversible | 6.99 | 6.99 | 6.99 | 4.97 | 3.54 | 1.29 |
| Q08376 | C366  | reversible | 6.99 | 6.99 | 6.99 | 5.03 | 3.65 | 1.47 |
| Q11131 | C365  | reversible | 6.99 | 6.99 | 6.99 | 4.87 | 3.37 | 1.01 |
| Q3U128 | C52   | so3h       | 0.1  | 0.1  | 0.1  | 0.35 | 0.53 | 0.81 |
| Q45VK7 | C3224 | so3h       | 6.99 | 6.99 | 6.99 | 4.87 | 3.38 | 1.02 |
| Q4U2R1 | C3981 | so3h       | 0.1  | 0.1  | 0.1  | 0.38 | 0.57 | 0.88 |
| Q52KR2 | C48   | reversible | 0.1  | 0.1  | 0.1  | 0.36 | 0.55 | 0.83 |
| Q5HZK1 | C115  | reversible | 0.1  | 0.1  | 0.1  | 0.41 | 0.63 | 0.98 |
| Q5SSH7 | C2826 | so2h       | 6.99 | 6.99 | 6.99 | 4.97 | 3.55 | 1.3  |
| Q5U405 | C293  | so3h       | 6.99 | 6.99 | 6.99 | 5.7  | 4.79 | 3.35 |
| Q61598 | C317  | reversible | 6.99 | 6.99 | 6.99 | 5.13 | 3.82 | 1.75 |
| Q62028 | C1376 | so2h       | 6.99 | 6.99 | 6.99 | 4.91 | 3.43 | 1.11 |
| Q63836 | C31   | reversible | 0.1  | 0.1  | 0.1  | 0.41 | 0.63 | 0.97 |
| Q63836 | C371  | reversible | 6.99 | 6.99 | 6.99 | 4.96 | 3.53 | 1.27 |
| Q68FD5 | C736  | reversible | 6.99 | 6.99 | 6.99 | 4.91 | 3.44 | 1.12 |
| Q69ZB0 | C85   | reversible | 0.1  | 0.1  | 0.1  | 0.37 | 0.56 | 0.86 |
| Q69ZK6 | C1682 | so3h       | 0.1  | 0.1  | 0.1  | 0.19 | 0.26 | 0.35 |
| Q69ZX8 | C105  | reversible | 6.99 | 6.99 | 6.99 | 4.99 | 3.58 | 1.35 |
| Q6P8X6 | C193  | reversible | 6.99 | 6.99 | 6.99 | 5.09 | 3.74 | 1.63 |
| Q6P8X6 | C196  | reversible | 6.99 | 6.99 | 6.99 | 5.09 | 3.74 | 1.63 |
| Q6R6I7 | C380  | so2h       | 0.1  | 0.1  | 0.1  | 0.38 | 0.58 | 0.89 |
| Q6WKZ8 | C513  | reversible | 0.1  | 0.1  | 0.1  | 0.42 | 0.64 | 0.99 |
| Q6ZQM0 | C286  | reversible | 0.1  | 0.1  | 0.1  | 0.37 | 0.56 | 0.86 |
| Q71FD7 | C268  | so2h       | 0.1  | 0.1  | 0.1  | 0.33 | 0.48 | 0.73 |
| Q7TNM2 | C246  | so3h       | 6.99 | 6.99 | 6.99 | 5.23 | 3.98 | 2.02 |
| Q7TPQ9 | C182  | so3h       | 6.99 | 6.99 | 6.99 | 5.29 | 4.09 | 2.19 |
| Q7TS63 | C827  | reversible | 0.1  | 0.1  | 0.1  | 0.41 | 0.62 | 0.96 |
| Q80SU3 | C102  | reversible | 6.99 | 6.99 | 6.99 | 5.05 | 3.68 | 1.51 |
| Q80TA9 | C430  | reversible | 0.1  | 0.1  | 0.1  | 0.39 | 0.59 | 0.91 |
| Q80UG2 | C803  | reversible | 0.1  | 0.1  | 0.1  | 0.4  | 0.6  | 0.93 |
| Q80UW0 | C256  | reversible | 6.99 | 6.99 | 6.99 | 4.94 | 3.49 | 1.21 |
| Q80Y84 | C708  | reversible | 6.99 | 6.99 | 6.99 | 5.11 | 3.79 | 1.69 |
| Q80Z71 | C1486 | reversible | 6.99 | 6.99 | 6.99 | 4.91 | 3.44 | 1.12 |
| Q810J8 | C103  | reversible | 6.99 | 6.99 | 6.99 | 4.9  | 3.42 | 1.1  |
| Q811B3 | C1396 | reversible | 0.1  | 0.1  | 0.1  | 0.42 | 0.64 | 1    |

|        |       |            |      |      |      |      |      |      |
|--------|-------|------------|------|------|------|------|------|------|
| Q811C2 | C388  | reversible | 0.1  | 0.1  | 0.1  | 0.4  | 0.61 | 0.94 |
| Q811T9 | C668  | reversible | 0.1  | 0.1  | 0.1  | 0.31 | 0.46 | 0.69 |
| Q8BGC4 | C55   | reversible | 0.1  | 0.1  | 0.1  | 0.4  | 0.61 | 0.93 |
| Q8BIK4 | C1488 | reversible | 6.99 | 6.99 | 6.99 | 4.87 | 3.37 | 1.01 |
| Q8BKC5 | C682  | so3h       | 6.99 | 6.99 | 6.99 | 5.32 | 4.14 | 2.28 |
| Q8BKX6 | C3184 | reversible | 0.1  | 0.1  | 0.1  | 0.34 | 0.5  | 0.76 |
| Q8BMQ3 | C863  | reversible | 0.1  | 0.1  | 0.1  | 0.25 | 0.35 | 0.51 |
| Q8BRH4 | C484  | reversible | 0.1  | 0.1  | 0.1  | 0.3  | 0.45 | 0.67 |
| Q8BWT1 | C382  | reversible | 0.1  | 0.1  | 0.1  | 0.35 | 0.52 | 0.78 |
| Q8C0R9 | C524  | so3h       | 6.99 | 6.99 | 6.99 | 4.87 | 3.37 | 1.01 |
| Q8C267 | C359  | reversible | 6.99 | 6.99 | 6.99 | 4.89 | 3.4  | 1.05 |
| Q8C6B2 | C62   | reversible | 0.1  | 0.1  | 0.1  | 0.32 | 0.47 | 0.71 |
| Q8CBX0 | C300  | reversible | 0.1  | 0.1  | 0.1  | 0.25 | 0.35 | 0.5  |
| Q8CFG4 | C112  | so3h       | 6.99 | 6.99 | 6.99 | 5.07 | 3.7  | 1.56 |
| Q8CG65 | C3182 | so2h       | 6.99 | 6.99 | 6.99 | 5.02 | 3.63 | 1.43 |
| Q8K354 | C226  | so2h       | 6.99 | 6.99 | 6.99 | 4.89 | 3.4  | 1.05 |
| Q8K354 | C227  | so2h       | 6.99 | 6.99 | 6.99 | 4.89 | 3.4  | 1.05 |
| Q8R4U0 | C207  | so2h       | 0.1  | 0.1  | 0.1  | 0.32 | 0.47 | 0.71 |
| Q8R4U0 | C212  | so2h       | 0.1  | 0.1  | 0.1  | 0.32 | 0.47 | 0.71 |
| Q91V24 | C772  | reversible | 6.99 | 6.99 | 6.99 | 5.06 | 3.7  | 1.54 |
| Q91VR2 | C103  | so3h       | 0.1  | 0.1  | 0.1  | 0.34 | 0.5  | 0.76 |
| Q91VY5 | C840  | so2h       | 0.1  | 0.1  | 0.1  | 0.39 | 0.6  | 0.92 |
| Q91WS0 | C83   | so3h       | 6.99 | 6.99 | 6.99 | 4.92 | 3.46 | 1.16 |
| Q91WT8 | C145  | so2h       | 0.1  | 0.1  | 0.1  | 0.4  | 0.6  | 0.93 |
| Q91WT8 | C151  | so3h       | 0.1  | 0.1  | 0.1  | 0.4  | 0.6  | 0.93 |
| Q91XD7 | C98   | reversible | 6.99 | 6.99 | 6.99 | 4.88 | 3.39 | 1.04 |
| Q91YT0 | C206  | so3h       | 6.99 | 6.99 | 6.99 | 5.24 | 4.01 | 2.06 |
| Q91YT0 | C255  | so3h       | 0.1  | 0.1  | 0.1  | 0.36 | 0.55 | 0.83 |
| Q91ZX7 | C4157 | so2h       | 0.1  | 0.1  | 0.1  | 0.35 | 0.52 | 0.8  |
| Q921G7 | C560  | so3h       | 0.1  | 0.1  | 0.1  | 0.42 | 0.64 | 0.98 |
| Q924C1 | C50   | so2h       | 6.99 | 6.99 | 6.99 | 5.05 | 3.68 | 1.52 |
| Q99J62 | C180  | so2h       | 6.99 | 6.99 | 6.99 | 4.94 | 3.49 | 1.21 |
| Q99N87 | C318  | so3h       | 0.1  | 0.1  | 0.1  | 0.24 | 0.33 | 0.48 |
| Q9CU24 | C404  | so3h       | 6.99 | 6.99 | 6.99 | 4.88 | 3.38 | 1.02 |
| Q9CU65 | C729  | so3h       | 0.1  | 0.1  | 0.1  | 0.31 | 0.46 | 0.69 |
| Q9CWD0 | C125  | so2h       | 0.1  | 0.1  | 0.1  | 0.31 | 0.46 | 0.69 |
| Q9CWD0 | C48   | so3h       | 6.99 | 6.99 | 6.99 | 5.09 | 3.75 | 1.64 |
| Q9CZ13 | C453  | so3h       | 6.99 | 6.99 | 6.99 | 4.92 | 3.45 | 1.13 |
| Q9CZ96 | C110  | so2h       | 6.99 | 6.99 | 6.99 | 5.25 | 4.02 | 2.09 |



|        |      |            |      |      |      |      |      |      |
|--------|------|------------|------|------|------|------|------|------|
| Q9D0B5 | C36  | so3h       | 0.1  | 0.1  | 0.1  | 0.31 | 0.45 | 0.68 |
| Q9D0M0 | C208 | so3h       | 0.1  | 0.1  | 0.1  | 0.38 | 0.58 | 0.89 |
| Q9DAG9 | C276 | reversible | 0.1  | 0.1  | 0.1  | 0.22 | 0.3  | 0.43 |
| Q9DB20 | C141 | so2h       | 0.1  | 0.1  | 0.1  | 0.42 | 0.64 | 1    |
| Q9DBR3 | C3   | reversible | 6.99 | 6.99 | 6.99 | 4.93 | 3.47 | 1.17 |
| Q9ERR8 | C105 | so2h       | 0.1  | 0.1  | 0.1  | 0.11 | 0.11 | 0.11 |
| Q9ERR8 | C108 | so2h       | 0.1  | 0.1  | 0.1  | 0.11 | 0.11 | 0.11 |
| Q9JLV6 | C444 | so2h       | 6.99 | 6.99 | 6.99 | 4.9  | 3.43 | 1.1  |
| Q9R160 | C620 | so2h       | 0.1  | 0.1  | 0.1  | 0.33 | 0.49 | 0.74 |
| Q9WV74 | C75  | reversible | 6.99 | 6.99 | 6.99 | 6.3  | 5.82 | 5.06 |
| Q9Z0J1 | C682 | so2h       | 6.99 | 6.99 | 6.99 | 4.87 | 3.37 | 1    |
| Q9Z0J1 | C688 | so3h       | 6.99 | 6.99 | 6.99 | 4.87 | 3.37 | 1    |
| Q9Z1K6 | C160 | so2h       | 6.99 | 6.99 | 6.99 | 4.93 | 3.48 | 1.18 |

**Supplemental Table S2.** Essential 10 biological functions associated with signature cysteine O-PTMs in each temporal cluster.

| <b>Biological Function #</b> | <b>Biological Function</b> | <b>Cluster</b> | <b>UniProt ID</b> | <b>Modified Amino Acid</b> | <b>Cysteine PTM type</b> |
|------------------------------|----------------------------|----------------|-------------------|----------------------------|--------------------------|
| BF1                          | Neutrophil degranulation   | 1              | Q61598            | C302                       | reversible               |
| BF1                          | Neutrophil degranulation   | 2              | Q01853            | C209                       | reversible               |
| BF1                          | Neutrophil degranulation   | 2              | Q01853            | C691                       | reversible               |
| BF1                          | Neutrophil degranulation   | 3              | Q8BY89            | C401                       | reversible               |
| BF1                          | Neutrophil degranulation   | 4              | Q61598            | C414                       | reversible               |
| BF1                          | Neutrophil degranulation   | 5              | P10605            | C319                       | reversible               |
| BF1                          | Neutrophil degranulation   | 1              | P09528            | C131                       | reversible               |
| BF1                          | Neutrophil degranulation   | 2              | Q61598            | C282                       | reversible               |
| BF1                          | Neutrophil degranulation   | 2              | Q61598            | C317                       | reversible               |
| BF1                          | Neutrophil degranulation   | 3              | Q08481            | C470                       | reversible               |
| BF1                          | Neutrophil degranulation   | 4              | Q60854            | C102                       | reversible               |
| BF1                          | Neutrophil degranulation   | 5              | Q60854            | C352                       | reversible               |
| BF1                          | Neutrophil degranulation   | 1              | Q9D1Q6            | C189                       | reversible               |
| BF1                          | Neutrophil degranulation   | 1              | Q9D1Q6            | C301                       | reversible               |
| BF1                          | Neutrophil degranulation   | 1              | Q9D1Q6            | C318                       | reversible               |
| BF1                          | Neutrophil degranulation   | 2              | P80314            | C395                       | reversible               |
| BF1                          | Neutrophil degranulation   | 3              | P58252            | C567                       | reversible               |
| BF1                          | Neutrophil degranulation   | 4              | Q8CI94            | C373                       | reversible               |
| BF1                          | Neutrophil degranulation   | 4              | Q8CI94            | C581                       | reversible               |
| BF1                          | Neutrophil degranulation   | 5              | O08807            | C54                        | reversible               |
| BF1                          | Neutrophil degranulation   | 1              | P06745            | C404                       | reversible               |
| BF1                          | Neutrophil degranulation   | 2              | P58252            | C290                       | reversible               |
| BF1                          | Neutrophil degranulation   | 2              | P58252            | C591                       | reversible               |
| BF1                          | Neutrophil degranulation   | 2              | P58252            | C693                       | reversible               |
| BF1                          | Neutrophil degranulation   | 3              | P24270            | C232                       | reversible               |
| BF1                          | Neutrophil degranulation   | 3              | P24270            | C425                       | reversible               |
| BF1                          | Neutrophil degranulation   | 4              | P18242            | C288                       | reversible               |
| BF1                          | Neutrophil degranulation   | 5              | P10126            | C234                       | reversible               |
| BF1                          | Neutrophil degranulation   | 1              | O08709            | C47                        | reversible               |
| BF1                          | Neutrophil degranulation   | 1              | O08709            | C47                        | so2h                     |
| BF1                          | Neutrophil degranulation   | 1              | O08709            | C47                        | so3h                     |
| BF1                          | Neutrophil degranulation   | 2              | Q921H8            | C381                       | reversible               |
| BF1                          | Neutrophil degranulation   | 3              | Q8CI94            | C437                       | reversible               |
| BF1                          | Neutrophil degranulation   | 3              | Q8CI94            | C143                       | reversible               |

|     |                          |   |        |       |            |
|-----|--------------------------|---|--------|-------|------------|
| BF1 | Neutrophil degranulation | 4 | Q8R5C5 | C34   | reversible |
| BF1 | Neutrophil degranulation | 5 | Q07113 | C724  | reversible |
| BF1 | Neutrophil degranulation | 5 | Q07113 | C807  | reversible |
| BF1 | Neutrophil degranulation | 5 | Q07113 | C886  | reversible |
| BF1 | Neutrophil degranulation | 5 | Q07113 | C2241 | reversible |
| BF1 | Neutrophil degranulation | 1 | Q3TXS7 | C571  | reversible |
| BF1 | Neutrophil degranulation | 2 | P52480 | C317  | so3h       |
| BF1 | Neutrophil degranulation | 3 | Q08857 | C313  | reversible |
| BF1 | Neutrophil degranulation | 4 | Q01853 | C105  | reversible |
| BF1 | Neutrophil degranulation | 5 | Q01853 | C572  | reversible |
| BF1 | Neutrophil degranulation | 1 | Q8CI94 | C326  | reversible |
| BF1 | Neutrophil degranulation | 2 | P01027 | C727  | reversible |
| BF1 | Neutrophil degranulation | 3 | Q8VDM4 | C448  | reversible |
| BF1 | Neutrophil degranulation | 4 | P63001 | C178  | reversible |
| BF1 | Neutrophil degranulation | 5 | P40124 | C92   | reversible |
| BF1 | Neutrophil degranulation | 1 | P18242 | C117  | reversible |
| BF1 | Neutrophil degranulation | 2 | Q9DBR3 | C288  | so3h       |
| BF1 | Neutrophil degranulation | 2 | Q9DBR3 | C3    | reversible |
| BF1 | Neutrophil degranulation | 3 | O89103 | C297  | reversible |
| BF1 | Neutrophil degranulation | 4 | P12382 | C351  | reversible |
| BF1 | Neutrophil degranulation | 5 | P63001 | C157  | reversible |
| BF1 | Neutrophil degranulation | 1 | P50543 | C8    | so3h       |
| BF1 | Neutrophil degranulation | 2 | Q8BWQ6 | C303  | so3h       |
| BF1 | Neutrophil degranulation | 2 | Q8BWQ6 | C315  | so3h       |
| BF1 | Neutrophil degranulation | 3 | P55849 | C673  | so2h       |
| BF1 | Neutrophil degranulation | 4 | Q01768 | C109  | reversible |
| BF1 | Neutrophil degranulation | 5 | P13020 | C670  | reversible |
| BF1 | Neutrophil degranulation | 1 | Q07113 | C513  | reversible |
| BF1 | Neutrophil degranulation | 2 | P17742 | C62   | reversible |
| BF1 | Neutrophil degranulation | 3 | Q07113 | C1509 | reversible |
| BF1 | Neutrophil degranulation | 4 | P58252 | C41   | reversible |
| BF1 | Neutrophil degranulation | 4 | P58252 | C466  | reversible |
| BF1 | Neutrophil degranulation | 5 | P58252 | C728  | reversible |
| BF1 | Neutrophil degranulation | 1 | Q01853 | C522  | reversible |
| BF1 | Neutrophil degranulation | 2 | Q9JHW2 | C170  | reversible |
| BF1 | Neutrophil degranulation | 3 | P17742 | C161  | reversible |
| BF1 | Neutrophil degranulation | 4 | Q08857 | C272  | reversible |
| BF1 | Neutrophil degranulation | 5 | Q91W90 | C366  | reversible |
| BF1 | Neutrophil degranulation | 1 | P12382 | C708  | reversible |

|     |                                                          |   |        |       |            |
|-----|----------------------------------------------------------|---|--------|-------|------------|
| BF1 | Neutrophil degranulation                                 | 4 | P52480 | C358  | reversible |
| BF1 | Neutrophil degranulation                                 | 4 | P52480 | C49   | reversible |
| BF1 | Neutrophil degranulation                                 | 5 | P63011 | C184  | reversible |
| BF1 | Neutrophil degranulation                                 | 1 | Q7TMB8 | C1087 | so2h       |
| BF1 | Neutrophil degranulation                                 | 4 | P05064 | C178  | reversible |
| BF1 | Neutrophil degranulation                                 | 5 | P01027 | C1101 | reversible |
| BF1 | Neutrophil degranulation                                 | 5 | P01027 | C1389 | reversible |
| BF1 | Neutrophil degranulation                                 | 5 | P01027 | C1458 | reversible |
| BF1 | Neutrophil degranulation                                 | 5 | P01027 | C1489 | reversible |
| BF1 | Neutrophil degranulation                                 | 5 | P01027 | C1537 | reversible |
| BF1 | Neutrophil degranulation                                 | 5 | P01027 | C559  | reversible |
| BF1 | Neutrophil degranulation                                 | 5 | P01027 | C626  | reversible |
| BF1 | Neutrophil degranulation                                 | 5 | P01027 | C720  | reversible |
| BF1 | Neutrophil degranulation                                 | 5 | P01027 | C728  | reversible |
| BF1 | Neutrophil degranulation                                 | 5 | P01027 | C816  | reversible |
| BF1 | Neutrophil degranulation                                 | 5 | P01027 | C873  | reversible |
| BF1 | Neutrophil degranulation                                 | 1 | O35598 | C436  | reversible |
| BF1 | Neutrophil degranulation                                 | 4 | Q9D0F9 | C160  | reversible |
| BF1 | Neutrophil degranulation                                 | 5 | Q9JHW2 | C44   | reversible |
| BF1 | Neutrophil degranulation                                 | 1 | Q08857 | C311  | so3h       |
| BF1 | Neutrophil degranulation                                 | 1 | Q08857 | C313  | so2h       |
| BF1 | Neutrophil degranulation                                 | 4 | P63017 | C603  | reversible |
| BF1 | Neutrophil degranulation                                 | 1 | Q9DBJ1 | C153  | reversible |
| BF1 | Neutrophil degranulation                                 | 1 | O54734 | C130  | reversible |
| BF1 | Neutrophil degranulation                                 | 1 | P52480 | C326  | reversible |
| BF1 | Neutrophil degranulation                                 | 1 | P05064 | C202  | reversible |
| BF1 | Neutrophil degranulation                                 | 1 | P05064 | C339  | reversible |
| BF1 | Neutrophil degranulation                                 | 1 | P05064 | C73   | reversible |
| BF1 | Neutrophil degranulation                                 | 1 | P01027 | C1511 | reversible |
| BF1 | Neutrophil degranulation                                 | 1 | Q3UDW8 | C533  | so2h       |
| BF1 | Neutrophil degranulation                                 | 1 | Q3UDW8 | C532  | so2h       |
| BF1 | Neutrophil degranulation                                 | 1 | Q9D0F9 | C101  | reversible |
| BF1 | Neutrophil degranulation                                 | 1 | P63017 | C17   | reversible |
| BF1 | Neutrophil degranulation                                 | 1 | Q9JHW2 | C97   | reversible |
| BF2 | Response to elevated platelet cytosolic Ca <sup>2+</sup> | 1 | Q9JI91 | C48   | reversible |
| BF2 | Response to elevated platelet cytosolic Ca <sup>2+</sup> | 2 | P07724 | C385  | so3h       |
| BF2 | Response to elevated platelet cytosolic Ca <sup>2+</sup> | 3 | P07724 | C289  | so3h       |

|     |                                                          |   |        |      |            |
|-----|----------------------------------------------------------|---|--------|------|------------|
| BF2 | Response to elevated platelet cytosolic Ca <sub>2+</sub> | 4 | P07724 | C114 | reversible |
| BF2 | Response to elevated platelet cytosolic Ca <sub>2+</sub> | 4 | P07724 | C115 | reversible |
| BF2 | Response to elevated platelet cytosolic Ca <sub>2+</sub> | 4 | P07724 | C148 | reversible |
| BF2 | Response to elevated platelet cytosolic Ca <sub>2+</sub> | 4 | P07724 | C201 | reversible |
| BF2 | Response to elevated platelet cytosolic Ca <sub>2+</sub> | 4 | P07724 | C289 | reversible |
| BF2 | Response to elevated platelet cytosolic Ca <sub>2+</sub> | 4 | P07724 | C303 | reversible |
| BF2 | Response to elevated platelet cytosolic Ca <sub>2+</sub> | 4 | P07724 | C313 | reversible |
| BF2 | Response to elevated platelet cytosolic Ca <sub>2+</sub> | 4 | P07724 | C340 | reversible |
| BF2 | Response to elevated platelet cytosolic Ca <sub>2+</sub> | 4 | P07724 | C77  | reversible |
| BF2 | Response to elevated platelet cytosolic Ca <sub>2+</sub> | 5 | Q9JI91 | C187 | reversible |
| BF2 | Response to elevated platelet cytosolic Ca <sub>2+</sub> | 1 | P07724 | C393 | reversible |
| BF2 | Response to elevated platelet cytosolic Ca <sub>2+</sub> | 1 | P07724 | C461 | reversible |
| BF2 | Response to elevated platelet cytosolic Ca <sub>2+</sub> | 1 | P07724 | C462 | reversible |
| BF2 | Response to elevated platelet cytosolic Ca <sub>2+</sub> | 1 | P07724 | C472 | reversible |
| BF2 | Response to elevated platelet cytosolic Ca <sub>2+</sub> | 1 | P07724 | C472 | so3h       |
| BF2 | Response to elevated platelet cytosolic Ca <sub>2+</sub> | 1 | P07724 | C501 | reversible |
| BF2 | Response to elevated platelet cytosolic Ca <sub>2+</sub> | 1 | P07724 | C538 | reversible |
| BF2 | Response to elevated platelet cytosolic Ca <sub>2+</sub> | 1 | P07724 | C582 | reversible |
| BF2 | Response to elevated platelet cytosolic Ca <sub>2+</sub> | 1 | P07724 | C583 | reversible |
| BF2 | Response to elevated platelet cytosolic Ca <sub>2+</sub> | 1 | P07724 | C591 | reversible |
| BF2 | Response to elevated platelet cytosolic Ca <sub>2+</sub> | 1 | P07724 | C86  | reversible |
| BF2 | Response to elevated platelet cytosolic Ca <sub>2+</sub> | 1 | P07724 | C384 | reversible |
| BF2 | Response to elevated platelet cytosolic Ca <sub>2+</sub> | 1 | P07724 | C385 | reversible |
| BF2 | Response to elevated platelet cytosolic Ca <sub>2+</sub> | 2 | Q9CZ30 | C187 | reversible |
| BF2 | Response to elevated platelet cytosolic Ca <sub>2+</sub> | 3 | Q08481 | C470 | reversible |
| BF2 | Response to elevated platelet cytosolic Ca <sub>2+</sub> | 4 | Q08857 | C272 | reversible |
| BF2 | Response to elevated platelet cytosolic Ca <sub>2+</sub> | 5 | P07724 | C302 | reversible |

|     |                                                          |   |        |       |            |
|-----|----------------------------------------------------------|---|--------|-------|------------|
| BF2 | Response to elevated platelet cytosolic Ca <sub>2+</sub> | 5 | P07724 | C485  | reversible |
| BF2 | Response to elevated platelet cytosolic Ca <sub>2+</sub> | 5 | P07724 | C500  | reversible |
| BF2 | Response to elevated platelet cytosolic Ca <sub>2+</sub> | 5 | P07724 | C511  | reversible |
| BF2 | Response to elevated platelet cytosolic Ca <sub>2+</sub> | 5 | P07724 | C99   | reversible |
| BF2 | Response to elevated platelet cytosolic Ca <sub>2+</sub> | 1 | P20918 | C73   | reversible |
| BF2 | Response to elevated platelet cytosolic Ca <sub>2+</sub> | 1 | P20918 | C257  | reversible |
| BF2 | Response to elevated platelet cytosolic Ca <sub>2+</sub> | 1 | P20918 | C335  | reversible |
| BF2 | Response to elevated platelet cytosolic Ca <sub>2+</sub> | 2 | P20918 | C586  | reversible |
| BF2 | Response to elevated platelet cytosolic Ca <sub>2+</sub> | 3 | Q08857 | C313  | reversible |
| BF2 | Response to elevated platelet cytosolic Ca <sub>2+</sub> | 4 | P20918 | C103  | reversible |
| BF2 | Response to elevated platelet cytosolic Ca <sub>2+</sub> | 5 | Q9CZ30 | C75   | reversible |
| BF2 | Response to elevated platelet cytosolic Ca <sub>2+</sub> | 1 | P63260 | C217  | reversible |
| BF2 | Response to elevated platelet cytosolic Ca <sub>2+</sub> | 2 | E9PV24 | C438  | reversible |
| BF2 | Response to elevated platelet cytosolic Ca <sub>2+</sub> | 4 | P05064 | C178  | reversible |
| BF2 | Response to elevated platelet cytosolic Ca <sub>2+</sub> | 5 | Q9ESB3 | C103  | reversible |
| BF2 | Response to elevated platelet cytosolic Ca <sub>2+</sub> | 5 | Q9ESB3 | C216  | reversible |
| BF2 | Response to elevated platelet cytosolic Ca <sub>2+</sub> | 1 | Q8VCM7 | C48   | reversible |
| BF2 | Response to elevated platelet cytosolic Ca <sub>2+</sub> | 1 | Q8VCM7 | C164  | reversible |
| BF2 | Response to elevated platelet cytosolic Ca <sub>2+</sub> | 2 | P63260 | C217  | so3h       |
| BF2 | Response to elevated platelet cytosolic Ca <sub>2+</sub> | 4 | Q92111 | C373  | reversible |
| BF2 | Response to elevated platelet cytosolic Ca <sub>2+</sub> | 5 | Q8VCM7 | C34   | reversible |
| BF2 | Response to elevated platelet cytosolic Ca <sub>2+</sub> | 1 | A2ASS6 | C6705 | so2h       |
| BF2 | Response to elevated platelet cytosolic Ca <sub>2+</sub> | 2 | Q92111 | C526  | so2h       |
| BF2 | Response to elevated platelet cytosolic Ca <sub>2+</sub> | 4 | O88342 | C325  | reversible |
| BF2 | Response to elevated platelet cytosolic Ca <sub>2+</sub> | 5 | Q92111 | C156  | reversible |
| BF2 | Response to elevated platelet cytosolic Ca <sub>2+</sub> | 5 | Q92111 | C177  | reversible |
| BF2 | Response to elevated platelet cytosolic Ca <sub>2+</sub> | 5 | Q92111 | C180  | reversible |

|     |                                                          |   |        |       |            |
|-----|----------------------------------------------------------|---|--------|-------|------------|
| BF2 | Response to elevated platelet cytosolic Ca <sub>2+</sub> | 5 | Q92111 | C246  | reversible |
| BF2 | Response to elevated platelet cytosolic Ca <sub>2+</sub> | 5 | Q92111 | C260  | reversible |
| BF2 | Response to elevated platelet cytosolic Ca <sub>2+</sub> | 5 | Q92111 | C28   | reversible |
| BF2 | Response to elevated platelet cytosolic Ca <sub>2+</sub> | 5 | Q92111 | C350  | reversible |
| BF2 | Response to elevated platelet cytosolic Ca <sub>2+</sub> | 5 | Q92111 | C363  | reversible |
| BF2 | Response to elevated platelet cytosolic Ca <sub>2+</sub> | 5 | Q92111 | C386  | reversible |
| BF2 | Response to elevated platelet cytosolic Ca <sub>2+</sub> | 5 | Q92111 | C506  | reversible |
| BF2 | Response to elevated platelet cytosolic Ca <sub>2+</sub> | 5 | Q92111 | C597  | reversible |
| BF2 | Response to elevated platelet cytosolic Ca <sub>2+</sub> | 5 | Q92111 | C633  | reversible |
| BF2 | Response to elevated platelet cytosolic Ca <sub>2+</sub> | 5 | Q92111 | C638  | reversible |
| BF2 | Response to elevated platelet cytosolic Ca <sub>2+</sub> | 5 | Q92111 | C692  | reversible |
| BF2 | Response to elevated platelet cytosolic Ca <sub>2+</sub> | 1 | P11276 | C136  | reversible |
| BF2 | Response to elevated platelet cytosolic Ca <sub>2+</sub> | 2 | P11276 | C374  | reversible |
| BF2 | Response to elevated platelet cytosolic Ca <sub>2+</sub> | 1 | Q8K0E8 | C213  | so2h       |
| BF2 | Response to elevated platelet cytosolic Ca <sub>2+</sub> | 2 | P26039 | C1661 | so2h       |
| BF2 | Response to elevated platelet cytosolic Ca <sub>2+</sub> | 2 | P26039 | C1671 | so3h       |
| BF2 | Response to elevated platelet cytosolic Ca <sub>2+</sub> | 1 | Q8C522 | C34   | reversible |
| BF2 | Response to elevated platelet cytosolic Ca <sub>2+</sub> | 1 | Q08857 | C311  | so3h       |
| BF2 | Response to elevated platelet cytosolic Ca <sub>2+</sub> | 1 | Q08857 | C313  | so2h       |
| BF2 | Response to elevated platelet cytosolic Ca <sub>2+</sub> | 1 | P05064 | C202  | reversible |
| BF2 | Response to elevated platelet cytosolic Ca <sub>2+</sub> | 1 | P05064 | C339  | reversible |
| BF2 | Response to elevated platelet cytosolic Ca <sub>2+</sub> | 1 | P05064 | C73   | reversible |
| BF2 | Response to elevated platelet cytosolic Ca <sub>2+</sub> | 1 | E9PV24 | C56   | reversible |
| BF2 | Response to elevated platelet cytosolic Ca <sub>2+</sub> | 1 | Q9ESB3 | C89   | reversible |
| BF2 | Response to elevated platelet cytosolic Ca <sub>2+</sub> | 1 | P20444 | C143  | so2h       |
| BF2 | Response to elevated platelet cytosolic Ca <sub>2+</sub> | 1 | Q92111 | C67   | reversible |
| BF2 | Response to elevated platelet cytosolic Ca <sub>2+</sub> | 1 | O88342 | C225  | so2h       |

|     |                                   |   |        |       |            |
|-----|-----------------------------------|---|--------|-------|------------|
| BF3 | Extracellular matrix organization | 1 | Q61554 | C1182 | reversible |
| BF3 | Extracellular matrix organization | 1 | Q61554 | C494  | reversible |
| BF3 | Extracellular matrix organization | 1 | Q61554 | C1008 | reversible |
| BF3 | Extracellular matrix organization | 1 | Q61554 | C1032 | so3h       |
| BF3 | Extracellular matrix organization | 1 | Q61554 | C1039 | so3h       |
| BF3 | Extracellular matrix organization | 2 | Q61554 | C2251 | reversible |
| BF3 | Extracellular matrix organization | 2 | Q61554 | C845  | reversible |
| BF3 | Extracellular matrix organization | 2 | Q61554 | C1081 | reversible |
| BF3 | Extracellular matrix organization | 3 | Q61554 | C2061 | reversible |
| BF3 | Extracellular matrix organization | 4 | Q61554 | C1847 | reversible |
| BF3 | Extracellular matrix organization | 5 | P02463 | C1616 | reversible |
| BF3 | Extracellular matrix organization | 5 | P02463 | C1493 | reversible |
| BF3 | Extracellular matrix organization | 1 | Q61555 | C512  | so3h       |
| BF3 | Extracellular matrix organization | 2 | Q60675 | C1141 | reversible |
| BF3 | Extracellular matrix organization | 2 | Q60675 | C1502 | reversible |
| BF3 | Extracellular matrix organization | 2 | Q60675 | C349  | reversible |
| BF3 | Extracellular matrix organization | 2 | Q60675 | C3115 | reversible |
| BF3 | Extracellular matrix organization | 2 | Q60675 | C831  | reversible |
| BF3 | Extracellular matrix organization | 3 | P97927 | C1222 | reversible |
| BF3 | Extracellular matrix organization | 4 | P10493 | C616  | reversible |
| BF3 | Extracellular matrix organization | 5 | P10605 | C319  | reversible |
| BF3 | Extracellular matrix organization | 1 | Q8BKV0 | C90   | so2h       |
| BF3 | Extracellular matrix organization | 2 | P26262 | C419  | reversible |
| BF3 | Extracellular matrix organization | 2 | P26262 | C383  | reversible |
| BF3 | Extracellular matrix organization | 3 | Q61555 | C2335 | so3h       |
| BF3 | Extracellular matrix organization | 4 | P09055 | C618  | reversible |
| BF3 | Extracellular matrix organization | 5 | Q61554 | C2413 | reversible |
| BF3 | Extracellular matrix organization | 5 | Q61554 | C460  | reversible |
| BF3 | Extracellular matrix organization | 5 | Q61554 | C2489 | reversible |
| BF3 | Extracellular matrix organization | 1 | P55066 | C1160 | so3h       |
| BF3 | Extracellular matrix organization | 2 | P55066 | C252  | so2h       |
| BF3 | Extracellular matrix organization | 3 | Q60675 | C1447 | reversible |
| BF3 | Extracellular matrix organization | 4 | Q61292 | C906  | reversible |
| BF3 | Extracellular matrix organization | 5 | Q60675 | C493  | reversible |
| BF3 | Extracellular matrix organization | 1 | P20918 | C73   | reversible |
| BF3 | Extracellular matrix organization | 1 | P20918 | C257  | reversible |
| BF3 | Extracellular matrix organization | 1 | P20918 | C335  | reversible |
| BF3 | Extracellular matrix organization | 2 | O08529 | C39   | reversible |
| BF3 | Extracellular matrix organization | 3 | O35566 | C185  | reversible |



|     |                                   |   |        |       |            |
|-----|-----------------------------------|---|--------|-------|------------|
| BF3 | Extracellular matrix organization | 4 | P20918 | C103  | reversible |
| BF3 | Extracellular matrix organization | 5 | A2ASQ1 | C441  | reversible |
| BF3 | Extracellular matrix organization | 1 | P18242 | C117  | reversible |
| BF3 | Extracellular matrix organization | 2 | P34960 | C3    | reversible |
| BF3 | Extracellular matrix organization | 3 | Q08481 | C470  | reversible |
| BF3 | Extracellular matrix organization | 4 | Q61739 | C881  | reversible |
| BF3 | Extracellular matrix organization | 5 | Q8K4G1 | C599  | reversible |
| BF3 | Extracellular matrix organization | 1 | A2ASQ1 | C1921 | reversible |
| BF3 | Extracellular matrix organization | 2 | P20918 | C586  | reversible |
| BF3 | Extracellular matrix organization | 3 | O88322 | C1317 | reversible |
| BF3 | Extracellular matrix organization | 4 | P18242 | C288  | reversible |
| BF3 | Extracellular matrix organization | 5 | Q8VCM7 | C34   | reversible |
| BF3 | Extracellular matrix organization | 1 | Q8VCM7 | C48   | reversible |
| BF3 | Extracellular matrix organization | 1 | Q8VCM7 | C164  | reversible |
| BF3 | Extracellular matrix organization | 2 | P11276 | C374  | reversible |
| BF3 | Extracellular matrix organization | 4 | Q05793 | C2313 | reversible |
| BF3 | Extracellular matrix organization | 5 | Q05793 | C1156 | reversible |
| BF3 | Extracellular matrix organization | 5 | Q05793 | C3137 | reversible |
| BF3 | Extracellular matrix organization | 5 | Q05793 | C811  | reversible |
| BF3 | Extracellular matrix organization | 5 | Q05793 | C892  | reversible |
| BF3 | Extracellular matrix organization | 1 | Q05793 | C2456 | reversible |
| BF3 | Extracellular matrix organization | 1 | Q05793 | C2456 | so3h       |
| BF3 | Extracellular matrix organization | 2 | Q3V3R4 | C130  | reversible |
| BF3 | Extracellular matrix organization | 5 | Q3V1T4 | C571  | reversible |
| BF3 | Extracellular matrix organization | 1 | O88839 | C668  | so2h       |
| BF3 | Extracellular matrix organization | 2 | Q05793 | C731  | reversible |
| BF3 | Extracellular matrix organization | 2 | Q05793 | C1140 | reversible |
| BF3 | Extracellular matrix organization | 5 | P10493 | C423  | reversible |
| BF3 | Extracellular matrix organization | 1 | A2ARA8 | C933  | so2h       |
| BF3 | Extracellular matrix organization | 1 | A2ARA8 | C923  | so2h       |
| BF3 | Extracellular matrix organization | 1 | A2ARA8 | C21   | so3h       |
| BF3 | Extracellular matrix organization | 1 | A2ARA8 | C22   | so3h       |
| BF3 | Extracellular matrix organization | 2 | P33434 | C21   | so3h       |
| BF3 | Extracellular matrix organization | 2 | P33434 | C22   | so3h       |
| BF3 | Extracellular matrix organization | 5 | Q61292 | C505  | reversible |
| BF3 | Extracellular matrix organization | 1 | Q61738 | C103  | reversible |
| BF3 | Extracellular matrix organization | 2 | Q80Z71 | C1486 | reversible |
| BF3 | Extracellular matrix organization | 5 | Q61739 | C154  | reversible |
| BF3 | Extracellular matrix organization | 1 | Q9QZR9 | C1675 | reversible |

|     |                                   |   |        |       |            |
|-----|-----------------------------------|---|--------|-------|------------|
| BF3 | Extracellular matrix organization | 2 | P10493 | C409  | reversible |
| BF3 | Extracellular matrix organization | 2 | P10493 | C712  | reversible |
| BF3 | Extracellular matrix organization | 5 | P02469 | C170  | reversible |
| BF3 | Extracellular matrix organization | 5 | P02469 | C1785 | reversible |
| BF3 | Extracellular matrix organization | 5 | P02469 | C190  | reversible |
| BF3 | Extracellular matrix organization | 1 | P02468 | C349  | reversible |
| BF3 | Extracellular matrix organization | 1 | P02468 | C472  | reversible |
| BF3 | Extracellular matrix organization | 1 | P02468 | C1013 | reversible |
| BF3 | Extracellular matrix organization | 1 | P02468 | C859  | so2h       |
| BF3 | Extracellular matrix organization | 1 | P02468 | C954  | reversible |
| BF3 | Extracellular matrix organization | 2 | Q61738 | C546  | reversible |
| BF3 | Extracellular matrix organization | 5 | O88792 | C49   | reversible |
| BF3 | Extracellular matrix organization | 1 | P08122 | C1653 | reversible |
| BF3 | Extracellular matrix organization | 2 | A6H584 | C1974 | so2h       |
| BF3 | Extracellular matrix organization | 1 | E9PV24 | C56   | reversible |
| BF3 | Extracellular matrix organization | 2 | P08122 | C1660 | reversible |
| BF3 | Extracellular matrix organization | 1 | P29788 | C179  | so2h       |
| BF3 | Extracellular matrix organization | 2 | E9PV24 | C438  | reversible |
| BF3 | Extracellular matrix organization | 1 | Q60675 | C1544 | reversible |
| BF3 | Extracellular matrix organization | 1 | Q60675 | C784  | reversible |
| BF3 | Extracellular matrix organization | 2 | Q9WVH9 | C53   | reversible |
| BF3 | Extracellular matrix organization | 1 | P37889 | C754  | reversible |
| BF3 | Extracellular matrix organization | 1 | P11276 | C136  | reversible |
| BF3 | Extracellular matrix organization | 1 | Q3V3R4 | C548  | so2h       |
| BF3 | Extracellular matrix organization | 1 | Q8K0E8 | C213  | so2h       |
| BF3 | Extracellular matrix organization | 1 | P10493 | C1230 | so3h       |
| BF3 | Extracellular matrix organization | 1 | P10493 | C1232 | so3h       |
| BF3 | Extracellular matrix organization | 1 | O35598 | C436  | reversible |
| BF3 | Extracellular matrix organization | 1 | Q61292 | C50   | reversible |
| BF3 | Extracellular matrix organization | 1 | P20444 | C143  | so2h       |
| BF4 | Protein Translation               | 1 | P51410 | C134  | reversible |
| BF4 | Protein Translation               | 2 | P62908 | C97   | reversible |
| BF4 | Protein Translation               | 3 | P35979 | C141  | reversible |
| BF4 | Protein Translation               | 4 | P58252 | C41   | reversible |
| BF4 | Protein Translation               | 4 | P58252 | C466  | reversible |
| BF4 | Protein Translation               | 5 | P97351 | C96   | reversible |
| BF4 | Protein Translation               | 1 | P29341 | C132  | reversible |
| BF4 | Protein Translation               | 2 | Q9CXW4 | C72   | reversible |
| BF4 | Protein Translation               | 3 | P58252 | C567  | reversible |

|     |                                            |   |        |       |            |
|-----|--------------------------------------------|---|--------|-------|------------|
| BF4 | Protein Translation                        | 5 | P62908 | C119  | reversible |
| BF4 | Protein Translation                        | 5 | P62908 | C134  | reversible |
| BF4 | Protein Translation                        | 1 | Q8R2Q4 | C329  | reversible |
| BF4 | Protein Translation                        | 2 | P58252 | C290  | reversible |
| BF4 | Protein Translation                        | 2 | P58252 | C591  | reversible |
| BF4 | Protein Translation                        | 2 | P58252 | C693  | reversible |
| BF4 | Protein Translation                        | 3 | P47962 | C62   | so2h       |
| BF4 | Protein Translation                        | 5 | P58252 | C728  | reversible |
| BF4 | Protein Translation                        | 1 | Q99N87 | C326  | reversible |
| BF4 | Protein Translation                        | 1 | Q99N87 | C318  | so3h       |
| BF4 | Protein Translation                        | 2 | Q6ZWW3 | C80   | so2h       |
| BF4 | Protein Translation                        | 3 | Q91VM9 | C156  | reversible |
| BF4 | Protein Translation                        | 5 | Q6ZWW3 | C105  | reversible |
| BF4 | Protein Translation                        | 2 | Q9D0G0 | C196  | reversible |
| BF4 | Protein Translation                        | 3 | Q9D7N3 | C227  | reversible |
| BF4 | Protein Translation                        | 5 | P62717 | C109  | reversible |
| BF4 | Protein Translation                        | 2 | P62702 | C181  | reversible |
| BF4 | Protein Translation                        | 5 | P62702 | C41   | reversible |
| BF4 | Protein Translation                        | 2 | Q9CQF0 | C50   | so3h       |
| BF4 | Protein Translation                        | 5 | P10126 | C234  | reversible |
| BF4 | Protein Translation                        | 2 | P60867 | C36   | reversible |
| BF4 | Protein Translation                        | 5 | P62281 | C60   | reversible |
| BF4 | Protein Translation                        | 2 | P62754 | C12   | reversible |
| BF4 | Protein Translation                        | 5 | P25444 | C229  | reversible |
| BF4 | Protein Translation                        | 2 | Q8BJU9 | C267  | reversible |
| BF5 | Post-translational protein phosphorylation | 1 | Q61554 | C1182 | reversible |
| BF5 | Post-translational protein phosphorylation | 1 | Q61554 | C494  | reversible |
| BF5 | Post-translational protein phosphorylation | 1 | Q61554 | C1008 | reversible |
| BF5 | Post-translational protein phosphorylation | 1 | Q61554 | C1032 | so3h       |
| BF5 | Post-translational protein phosphorylation | 1 | Q61554 | C1039 | so3h       |
| BF5 | Post-translational protein phosphorylation | 2 | Q61147 | C275  | reversible |
| BF5 | Post-translational protein phosphorylation | 3 | P21956 | C303  | reversible |
| BF5 | Post-translational protein phosphorylation | 4 | P21956 | C290  | reversible |
| BF5 | Post-translational protein phosphorylation | 5 | Q61554 | C2413 | reversible |
| BF5 | Post-translational protein phosphorylation | 5 | Q61554 | C460  | reversible |
| BF5 | Post-translational protein phosphorylation | 5 | Q61554 | C2489 | reversible |
| BF5 | Post-translational protein phosphorylation | 1 | Q61147 | C173  | reversible |
| BF5 | Post-translational protein phosphorylation | 2 | Q61554 | C2251 | reversible |
| BF5 | Post-translational protein phosphorylation | 2 | Q61554 | C845  | reversible |

|     |                                            |   |        |       |            |
|-----|--------------------------------------------|---|--------|-------|------------|
| BF5 | Post-translational protein phosphorylation | 2 | Q61554 | C1081 | reversible |
| BF5 | Post-translational protein phosphorylation | 3 | Q61554 | C2061 | reversible |
| BF5 | Post-translational protein phosphorylation | 4 | Q61554 | C1847 | reversible |
| BF5 | Post-translational protein phosphorylation | 5 | Q61147 | C199  | reversible |
| BF5 | Post-translational protein phosphorylation | 5 | Q61147 | C713  | reversible |
| BF5 | Post-translational protein phosphorylation | 1 | P07724 | C393  | reversible |
| BF5 | Post-translational protein phosphorylation | 1 | P07724 | C461  | reversible |
| BF5 | Post-translational protein phosphorylation | 1 | P07724 | C462  | reversible |
| BF5 | Post-translational protein phosphorylation | 1 | P07724 | C472  | reversible |
| BF5 | Post-translational protein phosphorylation | 1 | P07724 | C472  | so3h       |
| BF5 | Post-translational protein phosphorylation | 1 | P07724 | C501  | reversible |
| BF5 | Post-translational protein phosphorylation | 1 | P07724 | C538  | reversible |
| BF5 | Post-translational protein phosphorylation | 1 | P07724 | C582  | reversible |
| BF5 | Post-translational protein phosphorylation | 1 | P07724 | C583  | reversible |
| BF5 | Post-translational protein phosphorylation | 1 | P07724 | C591  | reversible |
| BF5 | Post-translational protein phosphorylation | 1 | P07724 | C86   | reversible |
| BF5 | Post-translational protein phosphorylation | 1 | P07724 | C384  | reversible |
| BF5 | Post-translational protein phosphorylation | 1 | P07724 | C385  | reversible |
| BF5 | Post-translational protein phosphorylation | 2 | P07724 | C385  | so3h       |
| BF5 | Post-translational protein phosphorylation | 3 | P07724 | C289  | so3h       |
| BF5 | Post-translational protein phosphorylation | 4 | P07724 | C114  | reversible |
| BF5 | Post-translational protein phosphorylation | 4 | P07724 | C115  | reversible |
| BF5 | Post-translational protein phosphorylation | 4 | P07724 | C148  | reversible |
| BF5 | Post-translational protein phosphorylation | 4 | P07724 | C201  | reversible |
| BF5 | Post-translational protein phosphorylation | 4 | P07724 | C289  | reversible |
| BF5 | Post-translational protein phosphorylation | 4 | P07724 | C303  | reversible |
| BF5 | Post-translational protein phosphorylation | 4 | P07724 | C313  | reversible |
| BF5 | Post-translational protein phosphorylation | 4 | P07724 | C340  | reversible |
| BF5 | Post-translational protein phosphorylation | 4 | P07724 | C77   | reversible |
| BF5 | Post-translational protein phosphorylation | 5 | P07724 | C302  | reversible |
| BF5 | Post-translational protein phosphorylation | 5 | P07724 | C485  | reversible |
| BF5 | Post-translational protein phosphorylation | 5 | P07724 | C500  | reversible |
| BF5 | Post-translational protein phosphorylation | 5 | P07724 | C511  | reversible |
| BF5 | Post-translational protein phosphorylation | 5 | P07724 | C99   | reversible |
| BF5 | Post-translational protein phosphorylation | 1 | Q8VCM7 | C48   | reversible |
| BF5 | Post-translational protein phosphorylation | 1 | Q8VCM7 | C164  | reversible |
| BF5 | Post-translational protein phosphorylation | 2 | P32261 | C54   | reversible |
| BF5 | Post-translational protein phosphorylation | 3 | P32261 | C463  | reversible |
| BF5 | Post-translational protein phosphorylation | 4 | P16045 | C61   | reversible |

|     |                                            |   |        |       |            |
|-----|--------------------------------------------|---|--------|-------|------------|
| BF5 | Post-translational protein phosphorylation | 5 | Q61292 | C505  | reversible |
| BF5 | Post-translational protein phosphorylation | 1 | P11276 | C136  | reversible |
| BF5 | Post-translational protein phosphorylation | 2 | P01029 | C1721 | reversible |
| BF5 | Post-translational protein phosphorylation | 4 | Q61292 | C906  | reversible |
| BF5 | Post-translational protein phosphorylation | 5 | P02469 | C170  | reversible |
| BF5 | Post-translational protein phosphorylation | 5 | P02469 | C1785 | reversible |
| BF5 | Post-translational protein phosphorylation | 5 | P02469 | C190  | reversible |
| BF5 | Post-translational protein phosphorylation | 1 | O35887 | C13   | so3h       |
| BF5 | Post-translational protein phosphorylation | 2 | E9PV24 | C438  | reversible |
| BF5 | Post-translational protein phosphorylation | 4 | Q92111 | C373  | reversible |
| BF5 | Post-translational protein phosphorylation | 5 | P01027 | C1101 | reversible |
| BF5 | Post-translational protein phosphorylation | 5 | P01027 | C1389 | reversible |
| BF5 | Post-translational protein phosphorylation | 5 | P01027 | C1458 | reversible |
| BF5 | Post-translational protein phosphorylation | 5 | P01027 | C1489 | reversible |
| BF5 | Post-translational protein phosphorylation | 5 | P01027 | C1537 | reversible |
| BF5 | Post-translational protein phosphorylation | 5 | P01027 | C559  | reversible |
| BF5 | Post-translational protein phosphorylation | 5 | P01027 | C626  | reversible |
| BF5 | Post-translational protein phosphorylation | 5 | P01027 | C720  | reversible |
| BF5 | Post-translational protein phosphorylation | 5 | P01027 | C728  | reversible |
| BF5 | Post-translational protein phosphorylation | 5 | P01027 | C816  | reversible |
| BF5 | Post-translational protein phosphorylation | 5 | P01027 | C873  | reversible |
| BF5 | Post-translational protein phosphorylation | 1 | P21956 | C308  | reversible |
| BF5 | Post-translational protein phosphorylation | 2 | P01027 | C727  | reversible |
| BF5 | Post-translational protein phosphorylation | 5 | Q8VCM7 | C34   | reversible |
| BF5 | Post-translational protein phosphorylation | 1 | O35598 | C436  | reversible |
| BF5 | Post-translational protein phosphorylation | 2 | Q92111 | C526  | so2h       |
| BF5 | Post-translational protein phosphorylation | 5 | Q92111 | C156  | reversible |
| BF5 | Post-translational protein phosphorylation | 5 | Q92111 | C177  | reversible |
| BF5 | Post-translational protein phosphorylation | 5 | Q92111 | C180  | reversible |
| BF5 | Post-translational protein phosphorylation | 5 | Q92111 | C246  | reversible |
| BF5 | Post-translational protein phosphorylation | 5 | Q92111 | C260  | reversible |
| BF5 | Post-translational protein phosphorylation | 5 | Q92111 | C28   | reversible |
| BF5 | Post-translational protein phosphorylation | 5 | Q92111 | C350  | reversible |
| BF5 | Post-translational protein phosphorylation | 5 | Q92111 | C363  | reversible |
| BF5 | Post-translational protein phosphorylation | 5 | Q92111 | C386  | reversible |
| BF5 | Post-translational protein phosphorylation | 5 | Q92111 | C506  | reversible |
| BF5 | Post-translational protein phosphorylation | 5 | Q92111 | C597  | reversible |
| BF5 | Post-translational protein phosphorylation | 5 | Q92111 | C633  | reversible |
| BF5 | Post-translational protein phosphorylation | 5 | Q92111 | C638  | reversible |

|     |                                            |   |        |       |            |
|-----|--------------------------------------------|---|--------|-------|------------|
| BF5 | Post-translational protein phosphorylation | 5 | Q92111 | C692  | reversible |
| BF5 | Post-translational protein phosphorylation | 1 | Q61292 | C50   | reversible |
| BF5 | Post-translational protein phosphorylation | 2 | P11276 | C374  | reversible |
| BF5 | Post-translational protein phosphorylation | 1 | P02468 | C349  | reversible |
| BF5 | Post-translational protein phosphorylation | 1 | P02468 | C472  | reversible |
| BF5 | Post-translational protein phosphorylation | 1 | P02468 | C1013 | reversible |
| BF5 | Post-translational protein phosphorylation | 1 | P02468 | C859  | so2h       |
| BF5 | Post-translational protein phosphorylation | 1 | P02468 | C954  | reversible |
| BF5 | Post-translational protein phosphorylation | 1 | P01027 | C1511 | reversible |
| BF5 | Post-translational protein phosphorylation | 1 | E9PV24 | C56   | reversible |
| BF5 | Post-translational protein phosphorylation | 1 | Q92111 | C67   | reversible |
| BF6 | Glucose metabolism                         | 1 | P17710 | C214  | reversible |
| BF6 | Glucose metabolism                         | 2 | P17710 | C869  | reversible |
| BF6 | Glucose metabolism                         | 2 | P17710 | C890  | so3h       |
| BF6 | Glucose metabolism                         | 3 | P09411 | C99   | reversible |
| BF6 | Glucose metabolism                         | 4 | Q9CR62 | C184  | reversible |
| BF6 | Glucose metabolism                         | 5 | P17182 | C337  | reversible |
| BF6 | Glucose metabolism                         | 1 | P12382 | C708  | reversible |
| BF6 | Glucose metabolism                         | 2 | Q05920 | C372  | reversible |
| BF6 | Glucose metabolism                         | 3 | O08528 | C368  | reversible |
| BF6 | Glucose metabolism                         | 3 | O08528 | C375  | reversible |
| BF6 | Glucose metabolism                         | 3 | O08528 | C909  | reversible |
| BF6 | Glucose metabolism                         | 4 | P16858 | C154  | reversible |
| BF6 | Glucose metabolism                         | 4 | P16858 | C22   | reversible |
| BF6 | Glucose metabolism                         | 5 | Q9QXX4 | C504  | reversible |
| BF6 | Glucose metabolism                         | 1 | P06745 | C404  | reversible |
| BF6 | Glucose metabolism                         | 2 | P14152 | C137  | so3h       |
| BF6 | Glucose metabolism                         | 3 | Q8BH59 | C505  | reversible |
| BF6 | Glucose metabolism                         | 4 | O70250 | C153  | reversible |
| BF6 | Glucose metabolism                         | 5 | Q8BH59 | C435  | reversible |
| BF6 | Glucose metabolism                         | 1 | Q9ERU9 | C1366 | reversible |
| BF6 | Glucose metabolism                         | 2 | P16858 | C150  | so2h       |
| BF6 | Glucose metabolism                         | 2 | P16858 | C154  | so3h       |
| BF6 | Glucose metabolism                         | 4 | P17751 | C268  | reversible |
| BF6 | Glucose metabolism                         | 1 | Q9DBJ1 | C153  | reversible |
| BF6 | Glucose metabolism                         | 2 | P52480 | C317  | so3h       |
| BF6 | Glucose metabolism                         | 4 | P17710 | C684  | reversible |
| BF6 | Glucose metabolism                         | 1 | P16858 | C150  | reversible |
| BF6 | Glucose metabolism                         | 1 | P16858 | C245  | reversible |

|     |                                                 |   |        |      |            |
|-----|-------------------------------------------------|---|--------|------|------------|
| BF6 | Glucose metabolism                              | 2 | P17182 | C339 | reversible |
| BF6 | Glucose metabolism                              | 4 | P12382 | C351 | reversible |
| BF6 | Glucose metabolism                              | 1 | P52480 | C326 | reversible |
| BF6 | Glucose metabolism                              | 2 | Q9WUA3 | C717 | so3h       |
| BF6 | Glucose metabolism                              | 4 | P14152 | C137 | reversible |
| BF6 | Glucose metabolism                              | 4 | P14152 | C154 | reversible |
| BF6 | Glucose metabolism                              | 1 | P05064 | C202 | reversible |
| BF6 | Glucose metabolism                              | 1 | P05064 | C339 | reversible |
| BF6 | Glucose metabolism                              | 1 | P05064 | C73  | reversible |
| BF6 | Glucose metabolism                              | 2 | P08249 | C93  | so3h       |
| BF6 | Glucose metabolism                              | 2 | P08249 | C89  | so2h       |
| BF6 | Glucose metabolism                              | 4 | P52480 | C358 | reversible |
| BF6 | Glucose metabolism                              | 4 | P52480 | C49  | reversible |
| BF6 | Glucose metabolism                              | 1 | P21550 | C337 | reversible |
| BF6 | Glucose metabolism                              | 4 | P09411 | C50  | reversible |
| BF6 | Glucose metabolism                              | 1 | Q9WUA3 | C122 | reversible |
| BF6 | Glucose metabolism                              | 4 | P05064 | C178 | reversible |
| BF6 | Glucose metabolism                              | 1 | P05201 | C391 | reversible |
| BF6 | Glucose metabolism                              | 4 | P21550 | C339 | reversible |
| BF6 | Glucose metabolism                              | 1 | P05202 | C295 | reversible |
| BF6 | Glucose metabolism                              | 1 | P05202 | C382 | reversible |
| BF6 | Glucose metabolism                              | 4 | P08249 | C212 | reversible |
| BF6 | Glucose metabolism                              | 4 | P08249 | C275 | reversible |
| BF6 | Glucose metabolism                              | 4 | P08249 | C285 | reversible |
| BF6 | Glucose metabolism                              | 4 | P08249 | C89  | reversible |
| BF6 | Glucose metabolism                              | 4 | P08249 | C93  | reversible |
| BF6 | Glucose metabolism                              | 4 | P47857 | C114 | reversible |
| BF6 | Glucose metabolism                              | 4 | P47857 | C709 | reversible |
| BF6 | Glucose metabolism                              | 4 | P05202 | C106 | reversible |
| BF6 | Glucose metabolism                              | 4 | P05202 | C187 | reversible |
| BF7 | Pyruvate metabolism and Citric Acid (TCA) cycle | 1 | Q8BMF3 | C450 | reversible |
| BF7 | Pyruvate metabolism and Citric Acid (TCA) cycle | 1 | Q8BMF3 | C82  | reversible |
| BF7 | Pyruvate metabolism and Citric Acid (TCA) cycle | 2 | P16125 | C164 | reversible |
| BF7 | Pyruvate metabolism and Citric Acid (TCA) cycle | 3 | Q60597 | C395 | reversible |
| BF7 | Pyruvate metabolism and Citric Acid (TCA) cycle | 4 | Q60597 | C566 | reversible |
| BF7 | Pyruvate metabolism and Citric Acid (TCA) cycle | 4 | Q60597 | C904 | reversible |

|     |                                                 |   |        |      |            |
|-----|-------------------------------------------------|---|--------|------|------------|
| BF7 | Pyruvate metabolism and Citric Acid (TCA) cycle | 5 | P06801 | C47  | reversible |
| BF7 | Pyruvate metabolism and Citric Acid (TCA) cycle | 1 | Q8R0F8 | C115 | reversible |
| BF7 | Pyruvate metabolism and Citric Acid (TCA) cycle | 2 | Q99KE1 | C190 | so3h       |
| BF7 | Pyruvate metabolism and Citric Acid (TCA) cycle | 3 | Q9D6R2 | C359 | reversible |
| BF7 | Pyruvate metabolism and Citric Acid (TCA) cycle | 4 | Q9D6R2 | C222 | reversible |
| BF7 | Pyruvate metabolism and Citric Acid (TCA) cycle | 4 | Q9D6R2 | C331 | reversible |
| BF7 | Pyruvate metabolism and Citric Acid (TCA) cycle | 4 | Q9D6R2 | C351 | reversible |
| BF7 | Pyruvate metabolism and Citric Acid (TCA) cycle | 5 | O08749 | C477 | reversible |
| BF7 | Pyruvate metabolism and Citric Acid (TCA) cycle | 1 | P06151 | C163 | reversible |
| BF7 | Pyruvate metabolism and Citric Acid (TCA) cycle | 2 | Q9CZB0 | C70  | reversible |
| BF7 | Pyruvate metabolism and Citric Acid (TCA) cycle | 3 | P06801 | C468 | reversible |
| BF7 | Pyruvate metabolism and Citric Acid (TCA) cycle | 4 | Q60932 | C140 | reversible |
| BF7 | Pyruvate metabolism and Citric Acid (TCA) cycle | 4 | Q60932 | C245 | reversible |
| BF7 | Pyruvate metabolism and Citric Acid (TCA) cycle | 5 | Q9WUM5 | C181 | reversible |
| BF7 | Pyruvate metabolism and Citric Acid (TCA) cycle | 5 | Q9WUM5 | C60  | reversible |
| BF7 | Pyruvate metabolism and Citric Acid (TCA) cycle | 1 | Q9D2G2 | C105 | reversible |
| BF7 | Pyruvate metabolism and Citric Acid (TCA) cycle | 2 | P06151 | C163 | so3h       |
| BF7 | Pyruvate metabolism and Citric Acid (TCA) cycle | 3 | Q91YP0 | C273 | reversible |
| BF7 | Pyruvate metabolism and Citric Acid (TCA) cycle | 4 | O08749 | C80  | reversible |
| BF7 | Pyruvate metabolism and Citric Acid (TCA) cycle | 4 | O08749 | C85  | reversible |
| BF7 | Pyruvate metabolism and Citric Acid (TCA) cycle | 5 | Q9CPU0 | C139 | reversible |
| BF7 | Pyruvate metabolism and Citric Acid (TCA) cycle | 1 | Q9CZU6 | C359 | so2h       |
| BF7 | Pyruvate metabolism and Citric Acid (TCA) cycle | 2 | Q99KI0 | C126 | so3h       |
| BF7 | Pyruvate metabolism and Citric Acid (TCA) cycle | 2 | Q99KI0 | C385 | so3h       |
| BF7 | Pyruvate metabolism and Citric Acid (TCA) cycle | 3 | Q8BMF3 | C275 | reversible |
| BF7 | Pyruvate metabolism and Citric Acid (TCA) cycle | 4 | Q9D051 | C263 | reversible |
| BF7 | Pyruvate metabolism and Citric Acid (TCA) cycle | 5 | P70404 | C333 | reversible |



|     |                                                 |   |        |      |            |
|-----|-------------------------------------------------|---|--------|------|------------|
| BF7 | Pyruvate metabolism and Citric Acid (TCA) cycle | 1 | Q9D051 | C169 | reversible |
| BF7 | Pyruvate metabolism and Citric Acid (TCA) cycle | 1 | Q9D051 | C161 | reversible |
| BF7 | Pyruvate metabolism and Citric Acid (TCA) cycle | 2 | Q8BFP9 | C238 | reversible |
| BF7 | Pyruvate metabolism and Citric Acid (TCA) cycle | 3 | Q9Z2I9 | C270 | reversible |
| BF7 | Pyruvate metabolism and Citric Acid (TCA) cycle | 4 | P35486 | C181 | reversible |
| BF7 | Pyruvate metabolism and Citric Acid (TCA) cycle | 4 | P35486 | C261 | reversible |
| BF7 | Pyruvate metabolism and Citric Acid (TCA) cycle | 4 | P35486 | C273 | reversible |
| BF7 | Pyruvate metabolism and Citric Acid (TCA) cycle | 5 | Q8K2B3 | C357 | reversible |
| BF7 | Pyruvate metabolism and Citric Acid (TCA) cycle | 1 | Q8BMF4 | C581 | reversible |
| BF7 | Pyruvate metabolism and Citric Acid (TCA) cycle | 2 | P08249 | C93  | so3h       |
| BF7 | Pyruvate metabolism and Citric Acid (TCA) cycle | 2 | P08249 | C89  | so2h       |
| BF7 | Pyruvate metabolism and Citric Acid (TCA) cycle | 3 | Q99KI0 | C410 | reversible |
| BF7 | Pyruvate metabolism and Citric Acid (TCA) cycle | 4 | Q8BMF4 | C290 | reversible |
| BF7 | Pyruvate metabolism and Citric Acid (TCA) cycle | 4 | Q8BMF4 | C483 | reversible |
| BF7 | Pyruvate metabolism and Citric Acid (TCA) cycle | 1 | P54071 | C336 | reversible |
| BF7 | Pyruvate metabolism and Citric Acid (TCA) cycle | 2 | P54071 | C113 | reversible |
| BF7 | Pyruvate metabolism and Citric Acid (TCA) cycle | 2 | P54071 | C154 | reversible |
| BF7 | Pyruvate metabolism and Citric Acid (TCA) cycle | 3 | Q7TSQ8 | C84  | reversible |
| BF7 | Pyruvate metabolism and Citric Acid (TCA) cycle | 4 | Q8K2B3 | C238 | reversible |
| BF7 | Pyruvate metabolism and Citric Acid (TCA) cycle | 4 | Q8K2B3 | C266 | reversible |
| BF7 | Pyruvate metabolism and Citric Acid (TCA) cycle | 4 | Q8K2B3 | C475 | reversible |
| BF7 | Pyruvate metabolism and Citric Acid (TCA) cycle | 4 | Q8K2B3 | C536 | reversible |
| BF7 | Pyruvate metabolism and Citric Acid (TCA) cycle | 4 | Q8K2B3 | C654 | reversible |
| BF7 | Pyruvate metabolism and Citric Acid (TCA) cycle | 1 | P70404 | C148 | reversible |
| BF7 | Pyruvate metabolism and Citric Acid (TCA) cycle | 1 | P70404 | C235 | reversible |
| BF7 | Pyruvate metabolism and Citric Acid (TCA) cycle | 1 | P70404 | C236 | reversible |
| BF7 | Pyruvate metabolism and Citric Acid (TCA) cycle | 2 | P00342 | C163 | so3h       |

|     |                                                 |   |        |      |            |
|-----|-------------------------------------------------|---|--------|------|------------|
| BF7 | Pyruvate metabolism and Citric Acid (TCA) cycle | 3 | P54071 | C418 | reversible |
| BF7 | Pyruvate metabolism and Citric Acid (TCA) cycle | 4 | Q9Z2I9 | C152 | reversible |
| BF7 | Pyruvate metabolism and Citric Acid (TCA) cycle | 4 | Q9Z2I9 | C158 | reversible |
| BF7 | Pyruvate metabolism and Citric Acid (TCA) cycle | 4 | Q9Z2I9 | C430 | reversible |
| BF7 | Pyruvate metabolism and Citric Acid (TCA) cycle | 1 | Q8K2B3 | C189 | reversible |
| BF7 | Pyruvate metabolism and Citric Acid (TCA) cycle | 1 | Q8K2B3 | C467 | reversible |
| BF7 | Pyruvate metabolism and Citric Acid (TCA) cycle | 2 | Q8K2B3 | C191 | reversible |
| BF7 | Pyruvate metabolism and Citric Acid (TCA) cycle | 4 | Q9CZB0 | C107 | reversible |
| BF7 | Pyruvate metabolism and Citric Acid (TCA) cycle | 4 | Q99KI0 | C385 | reversible |
| BF7 | Pyruvate metabolism and Citric Acid (TCA) cycle | 4 | Q9CZU6 | C101 | reversible |
| BF7 | Pyruvate metabolism and Citric Acid (TCA) cycle | 4 | P08249 | C212 | reversible |
| BF7 | Pyruvate metabolism and Citric Acid (TCA) cycle | 4 | P08249 | C275 | reversible |
| BF7 | Pyruvate metabolism and Citric Acid (TCA) cycle | 4 | P08249 | C285 | reversible |
| BF7 | Pyruvate metabolism and Citric Acid (TCA) cycle | 4 | P08249 | C89  | reversible |
| BF7 | Pyruvate metabolism and Citric Acid (TCA) cycle | 4 | P08249 | C93  | reversible |
| BF7 | Pyruvate metabolism and Citric Acid (TCA) cycle | 4 | P54071 | C308 | reversible |
| BF7 | Pyruvate metabolism and Citric Acid (TCA) cycle | 4 | P54071 | C402 | reversible |
| BF8 | Respiratory electron transport                  | 1 | Q91VD9 | C554 | reversible |
| BF8 | Respiratory electron transport                  | 1 | Q91VD9 | C179 | so3h       |
| BF8 | Respiratory electron transport                  | 1 | Q91VD9 | C176 | so2h       |
| BF8 | Respiratory electron transport                  | 1 | Q91VD9 | C182 | so3h       |
| BF8 | Respiratory electron transport                  | 2 | Q921G7 | C588 | reversible |
| BF8 | Respiratory electron transport                  | 3 | Q91VD9 | C78  | reversible |
| BF8 | Respiratory electron transport                  | 4 | Q91VD9 | C367 | reversible |
| BF8 | Respiratory electron transport                  | 4 | Q91VD9 | C75  | reversible |
| BF8 | Respiratory electron transport                  | 4 | Q91VD9 | C92  | reversible |
| BF8 | Respiratory electron transport                  | 5 | Q921G7 | C386 | reversible |
| BF8 | Respiratory electron transport                  | 1 | Q921G7 | C560 | so3h       |
| BF8 | Respiratory electron transport                  | 2 | Q9DCJ5 | C78  | reversible |
| BF8 | Respiratory electron transport                  | 3 | Q8JZN5 | C275 | reversible |
| BF8 | Respiratory electron transport                  | 3 | Q8JZN5 | C617 | reversible |
| BF8 | Respiratory electron transport                  | 4 | Q921G7 | C117 | reversible |

|     |                                      |   |        |      |            |
|-----|--------------------------------------|---|--------|------|------------|
| BF8 | Respiratory electron transport       | 4 | Q921G7 | C265 | reversible |
| BF8 | Respiratory electron transport       | 5 | P52503 | C104 | reversible |
| BF8 | Respiratory electron transport       | 1 | Q7TMF3 | C92  | reversible |
| BF8 | Respiratory electron transport       | 2 | Q9CR61 | C59  | reversible |
| BF8 | Respiratory electron transport       | 4 | Q9D8B4 | C18  | reversible |
| BF8 | Respiratory electron transport       | 4 | Q9D8B4 | C95  | reversible |
| BF8 | Respiratory electron transport       | 5 | Q9CQJ8 | C42  | reversible |
| BF8 | Respiratory electron transport       | 1 | Q9DC70 | C194 | reversible |
| BF8 | Respiratory electron transport       | 2 | P52503 | C79  | so3h       |
| BF8 | Respiratory electron transport       | 4 | Q9DCS9 | C125 | reversible |
| BF8 | Respiratory electron transport       | 4 | Q9DCS9 | C77  | reversible |
| BF8 | Respiratory electron transport       | 5 | Q91YT0 | C255 | reversible |
| BF8 | Respiratory electron transport       | 1 | Q91YT0 | C238 | reversible |
| BF8 | Respiratory electron transport       | 1 | Q91YT0 | C255 | so3h       |
| BF8 | Respiratory electron transport       | 2 | Q8JZN5 | C331 | reversible |
| BF8 | Respiratory electron transport       | 4 | Q9DCJ5 | C110 | reversible |
| BF8 | Respiratory electron transport       | 4 | Q9DCJ5 | C36  | reversible |
| BF8 | Respiratory electron transport       | 4 | Q9DCJ5 | C66  | reversible |
| BF8 | Respiratory electron transport       | 2 | Q91YT0 | C206 | so3h       |
| BF8 | Respiratory electron transport       | 4 | Q9CR61 | C80  | reversible |
| BF8 | Respiratory electron transport       | 4 | Q99LC5 | C109 | reversible |
| BF8 | Respiratory electron transport       | 4 | Q99LC5 | C155 | reversible |
| BF8 | Respiratory electron transport       | 4 | Q99LC5 | C53  | reversible |
| BF8 | Respiratory electron transport       | 4 | Q99LC5 | C68  | reversible |
| BF8 | Respiratory electron transport       | 4 | Q99LY9 | C43  | reversible |
| BF8 | Respiratory electron transport       | 4 | Q99LY9 | C66  | reversible |
| BF8 | Respiratory electron transport       | 4 | Q99LC3 | C183 | reversible |
| BF8 | Respiratory electron transport       | 4 | Q99LC3 | C67  | reversible |
| BF8 | Respiratory electron transport       | 4 | P52503 | C79  | reversible |
| BF8 | Respiratory electron transport       | 4 | Q9DCW4 | C66  | reversible |
| BF8 | Respiratory electron transport       | 4 | Q9DCW4 | C71  | reversible |
| BF8 | Respiratory electron transport       | 4 | Q91YT0 | C125 | reversible |
| BF8 | Respiratory electron transport       | 4 | Q91YT0 | C142 | reversible |
| BF9 | Branched-chain amino acid catabolism | 1 | Q9DBL1 | C261 | reversible |
| BF9 | Branched-chain amino acid catabolism | 2 | O35855 | C346 | reversible |
| BF9 | Branched-chain amino acid catabolism | 3 | O35855 | C343 | reversible |
| BF9 | Branched-chain amino acid catabolism | 3 | O35855 | C93  | reversible |
| BF9 | Branched-chain amino acid catabolism | 4 | Q9DBL1 | C234 | reversible |
| BF9 | Branched-chain amino acid catabolism | 5 | O35855 | C136 | reversible |

|      |                                      |   |        |      |            |
|------|--------------------------------------|---|--------|------|------------|
| BF9  | Branched-chain amino acid catabolism | 1 | O35855 | C148 | reversible |
| BF9  | Branched-chain amino acid catabolism | 2 | Q99MR8 | C186 | reversible |
| BF9  | Branched-chain amino acid catabolism | 3 | Q8QZS1 | C44  | reversible |
| BF9  | Branched-chain amino acid catabolism | 4 | Q99MR8 | C450 | reversible |
| BF9  | Branched-chain amino acid catabolism | 4 | Q99MR8 | C591 | reversible |
| BF9  | Branched-chain amino acid catabolism | 5 | O08749 | C477 | reversible |
| BF9  | Branched-chain amino acid catabolism | 1 | Q9D7B6 | C281 | reversible |
| BF9  | Branched-chain amino acid catabolism | 2 | Q3ULD5 | C267 | reversible |
| BF9  | Branched-chain amino acid catabolism | 2 | Q3ULD5 | C392 | reversible |
| BF9  | Branched-chain amino acid catabolism | 4 | Q9D7B6 | C215 | reversible |
| BF9  | Branched-chain amino acid catabolism | 4 | Q9D7B6 | C249 | reversible |
| BF9  | Branched-chain amino acid catabolism | 1 | Q8BH95 | C225 | reversible |
| BF9  | Branched-chain amino acid catabolism | 2 | P53395 | C333 | reversible |
| BF9  | Branched-chain amino acid catabolism | 4 | Q3ULD5 | C167 | reversible |
| BF9  | Branched-chain amino acid catabolism | 4 | Q3ULD5 | C391 | reversible |
| BF9  | Branched-chain amino acid catabolism | 1 | Q6P3A8 | C226 | reversible |
| BF9  | Branched-chain amino acid catabolism | 2 | Q6P3A8 | C297 | reversible |
| BF9  | Branched-chain amino acid catabolism | 4 | O08749 | C80  | reversible |
| BF9  | Branched-chain amino acid catabolism | 4 | O08749 | C85  | reversible |
| BF9  | Branched-chain amino acid catabolism | 1 | Q8QZS1 | C335 | reversible |
| BF9  | Branched-chain amino acid catabolism | 2 | Q9JHI5 | C134 | reversible |
| BF9  | Branched-chain amino acid catabolism | 4 | Q9JHI5 | C252 | reversible |
| BF9  | Branched-chain amino acid catabolism | 4 | Q9JHI5 | C348 | reversible |
| BF9  | Branched-chain amino acid catabolism | 2 | P50136 | C194 | reversible |
| BF9  | Branched-chain amino acid catabolism | 4 | Q8QZS1 | C94  | reversible |
| BF9  | Branched-chain amino acid catabolism | 4 | Q8QZT1 | C116 | reversible |
| BF9  | Branched-chain amino acid catabolism | 4 | Q8QZT1 | C193 | reversible |
| BF9  | Branched-chain amino acid catabolism | 4 | Q9EQ20 | C86  | reversible |
| BF10 | Fatty acid metabolism                | 1 | Q9CQR4 | C74  | reversible |
| BF10 | Fatty acid metabolism                | 2 | P34914 | C120 | reversible |
| BF10 | Fatty acid metabolism                | 3 | P34914 | C521 | reversible |
| BF10 | Fatty acid metabolism                | 4 | P34914 | C230 | reversible |
| BF10 | Fatty acid metabolism                | 5 | O70325 | C102 | reversible |
| BF10 | Fatty acid metabolism                | 1 | Q07417 | C151 | reversible |
| BF10 | Fatty acid metabolism                | 1 | Q07417 | C109 | reversible |
| BF10 | Fatty acid metabolism                | 2 | Q9WUR2 | C279 | reversible |
| BF10 | Fatty acid metabolism                | 3 | Q99MN9 | C518 | reversible |
| BF10 | Fatty acid metabolism                | 3 | Q99MN9 | C367 | reversible |
| BF10 | Fatty acid metabolism                | 3 | Q99MN9 | C519 | reversible |

|      |                       |   |        |      |            |
|------|-----------------------|---|--------|------|------------|
| BF10 | Fatty acid metabolism | 4 | Q61425 | C201 | reversible |
| BF10 | Fatty acid metabolism | 5 | Q8BWT1 | C103 | reversible |
| BF10 | Fatty acid metabolism | 5 | Q8BWT1 | C287 | reversible |
| BF10 | Fatty acid metabolism | 1 | Q8BWT1 | C107 | reversible |
| BF10 | Fatty acid metabolism | 1 | Q8BWT1 | C382 | reversible |
| BF10 | Fatty acid metabolism | 2 | P16332 | C469 | reversible |
| BF10 | Fatty acid metabolism | 3 | O70325 | C16  | so2h       |
| BF10 | Fatty acid metabolism | 4 | Q924X2 | C448 | reversible |
| BF10 | Fatty acid metabolism | 4 | Q924X2 | C526 | reversible |
| BF10 | Fatty acid metabolism | 5 | Q9Z2Z6 | C58  | reversible |
| BF10 | Fatty acid metabolism | 1 | Q8BH95 | C225 | reversible |
| BF10 | Fatty acid metabolism | 2 | Q61425 | C99  | reversible |
| BF10 | Fatty acid metabolism | 3 | Q07417 | C289 | reversible |
| BF10 | Fatty acid metabolism | 4 | Q9Z2Z6 | C155 | reversible |
| BF10 | Fatty acid metabolism | 5 | Q9CQ62 | C86  | reversible |
| BF10 | Fatty acid metabolism | 1 | Q8C7H1 | C97  | reversible |
| BF10 | Fatty acid metabolism | 2 | O55137 | C412 | reversible |
| BF10 | Fatty acid metabolism | 3 | P51174 | C342 | reversible |
| BF10 | Fatty acid metabolism | 4 | Q8BMS1 | C747 | reversible |
| BF10 | Fatty acid metabolism | 5 | P41216 | C242 | reversible |
| BF10 | Fatty acid metabolism | 1 | Q99J39 | C31  | so3h       |
| BF10 | Fatty acid metabolism | 1 | Q99J39 | C447 | reversible |
| BF10 | Fatty acid metabolism | 2 | Q921H8 | C381 | reversible |
| BF10 | Fatty acid metabolism | 3 | Q924X2 | C155 | reversible |
| BF10 | Fatty acid metabolism | 4 | P41216 | C510 | reversible |
| BF10 | Fatty acid metabolism | 5 | P50544 | C423 | reversible |
| BF10 | Fatty acid metabolism | 1 | P41216 | C55  | reversible |
| BF10 | Fatty acid metabolism | 2 | Q8BWT1 | C92  | reversible |
| BF10 | Fatty acid metabolism | 3 | Q99J39 | C359 | reversible |
| BF10 | Fatty acid metabolism | 4 | Q80XL6 | C635 | so3h       |
| BF10 | Fatty acid metabolism | 2 | P52825 | C512 | reversible |
| BF10 | Fatty acid metabolism | 2 | P52825 | C84  | reversible |
| BF10 | Fatty acid metabolism | 3 | Q99P30 | C223 | reversible |
| BF10 | Fatty acid metabolism | 4 | P50544 | C478 | reversible |
| BF10 | Fatty acid metabolism | 2 | P41216 | C626 | reversible |
| BF10 | Fatty acid metabolism | 3 | Q8BMS1 | C470 | reversible |
| BF10 | Fatty acid metabolism | 2 | P47934 | C449 | reversible |
| BF10 | Fatty acid metabolism | 3 | P41216 | C133 | reversible |
| BF10 | Fatty acid metabolism | 2 | P50544 | C216 | reversible |

|      |                       |   |        |      |            |
|------|-----------------------|---|--------|------|------------|
| BF10 | Fatty acid metabolism | 2 | P50544 | C238 | reversible |
| BF10 | Fatty acid metabolism | 2 | P50544 | C604 | reversible |
| BF10 | Fatty acid metabolism | 3 | Q9R0H0 | C199 | reversible |
